# Supplementary material for: A mechanistic study reveals the roles of the ligand and substrate in the Pd-catalyzed C–H bond hydroxylation of a carboxylic acid with molecular oxygen
Source: Royal Society of Chemistry journal article supplement (doi:10.1039/d4qo01207k), 2024-01-01
Supplement: d4qo01207k1.pdf [file d4qo01207k1.pdf]

## Supporting Information

# Mechanistic Study Reveals the Roles of Ligand and Substrate on the Pd-catalyzed C-H Bond Hydroxylation of Carboxylic Acid with Molecular Oxygen

Hui-Mei Shan<sup>†,‡</sup>, Qian Wang,<sup>‡</sup> Ze-Hua Sun,<sup>‡</sup> Yuxiang Bu,<sup>†</sup> Li-Ping Xu<sup>\*†</sup>

<sup>†</sup>School of Chemistry and Chemical Engineering, Shandong University, Jinan 250100, P. R. China

<sup>‡</sup>School of Chemistry and Chemical Engineering, Shandong University of Technology, Zibo 255049, P. R. China

Email: xulp@sdu.edu.cn

### Contents

|                                                                                                                                                                                                                  |     |
|------------------------------------------------------------------------------------------------------------------------------------------------------------------------------------------------------------------|-----|
| 1. The formation of subK (energies are in kcal/mol).....                                                                                                                                                         | S2  |
| 2. The tautomerization of the ligand (energies are in kcal/mol).....                                                                                                                                             | S2  |
| 3. The reaction free energy for protonation-dimerization with different possible proton forms.....                                                                                                               | S2  |
| 4. The dissociative mechanism for the ligand exchange process of subK + <b>1'</b> → <b>2</b> + HOAc. ....                                                                                                        | S3  |
| 5. The Geometry Parameters, Spin Densities, and Energies for Different Pd-O <sub>2</sub> Complexes.....                                                                                                          | S3  |
| 6. The ligand exchange process between benzoquinone and pyridine of intermediate <b>12</b> .....                                                                                                                 | S4  |
| 7. The reaction pathway of <b>5</b> to <b>6<sup>s</sup>_Pyr</b> .....                                                                                                                                            | S4  |
| 8. The reaction pathway from <b>6<sup>s</sup>_Pyr</b> to <b>10</b> .....                                                                                                                                         | S5  |
| 9. The 3D geometries for the key intermediates <b>6<sup>t</sup></b> , <b>6<sup>s</sup></b> , <b>6<sup>t</sup>_AcOH</b> , <b>6<sup>s</sup>_AcOH</b> , <b>6<sup>t</sup>_Pyr</b> , and <b>6<sup>s</sup>_Pyr</b> ... | S6  |
| 10. The 3D geometry of the transition state <b>11-ts</b> .....                                                                                                                                                   | S7  |
| 11. Energetics for all calculated species .....                                                                                                                                                                  | S8  |
| 12. Cartesian coordinates for all calculated species.....                                                                                                                                                        | S10 |

1. The formation of subK (energies are in kcal/mol).

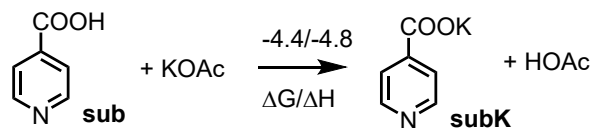

**Figure S1.** The formation of subK.

2. The tautomerization of the ligand (energies are in kcal/mol)

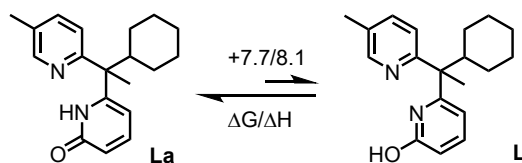

**Figure S2.** The tautomerization of the ligand.

3. The reaction free energy for protonation-dimerization with different possible proton forms.

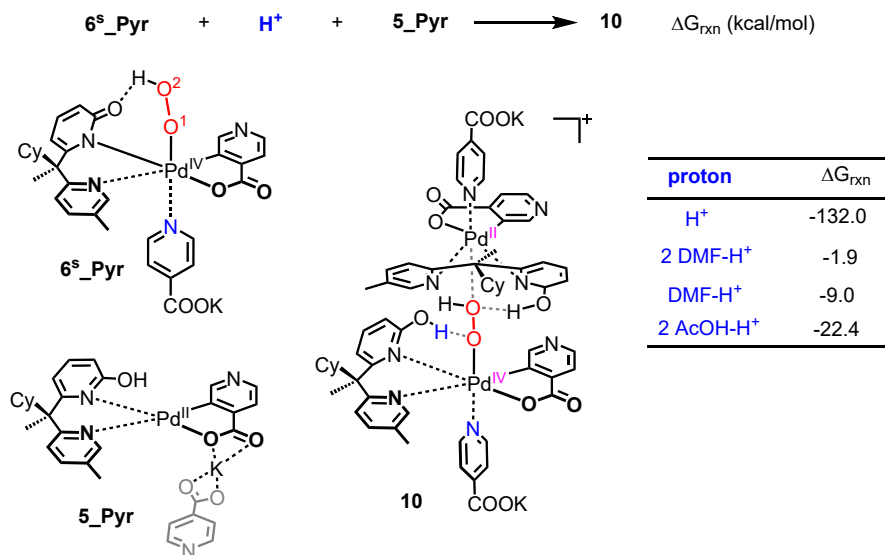

**Figure S3.** The reaction free energy for protonation-dimerization with different possible proton forms.

4. The dissociative mechanism for the ligand exchange process of subK + **1'** → **2** + HOAc.

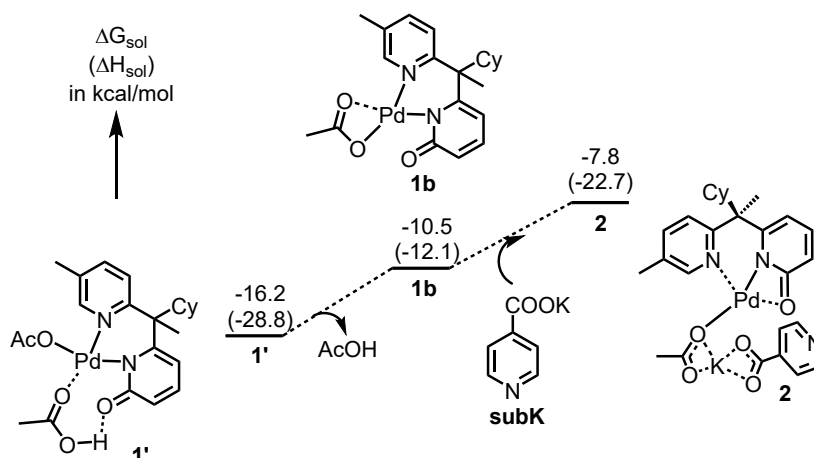

**Figure S4.** The dissociative mechanism for the process of subK + **1'** → **2** + HOAc.

5. The Geometry Parameters, Spin Densities, and Energies for Different Pd-O<sub>2</sub> Complexes.

**Table S1.** The Geometry Parameters, Spin Densities, and Energies for Different Pd-O<sub>2</sub> Complexes (Bond Distances Are Given in Å; Spin Densities Are in |e|; Energies Are in kcal/mol and Are Relative to Pd(OAc)<sub>2</sub>; The Superscript “t” and “s” Means “Triplet” and “Singlet”, respectively).

| Species                   | Pd-N <sup>1</sup> | Pd-N <sup>2</sup> | Pd-C <sup>1</sup> | Pd-O <sup>4</sup> | Pd-O <sup>1</sup> | O <sup>1</sup> -O <sup>2</sup> | O <sup>2</sup> -H <sup>1</sup><br>(O <sup>1</sup> -H <sup>1</sup> ) | O <sup>3</sup> -H <sup>1</sup> | Pd-O <sup>5</sup> | Pd-N <sup>3</sup> | spin<br>Pd | spin<br>O <sup>1</sup> | spin<br>O <sup>2</sup> | ΔG(ΔH)      |
|---------------------------|-------------------|-------------------|-------------------|-------------------|-------------------|--------------------------------|---------------------------------------------------------------------|--------------------------------|-------------------|-------------------|------------|------------------------|------------------------|-------------|
| <b>6<sup>t</sup></b>      | 2.11              | 2.07              | 2.01              | 2.04              | 3.84              | 1.21                           | 3.15                                                                | 0.98                           | -                 | -                 | 0          | 1.00                   | 1.00                   | -9.1(-16.5) |
| <b>6<sup>s</sup></b>      | 2.12              | 2.11              | 2.02              | 2.03              | 2.15              | 1.29                           | 1.57                                                                | 1.01                           | -                 | -                 | -          | -                      | -                      | 22.3(10.1)  |
| <b>6<sup>t</sup>_AcOH</b> | 2.11              | 2.07              | 2.01              | 2.06              | 3.75              | 1.21                           | 2.85                                                                | 0.98                           | 3.19              | -                 | 0          | 1.00                   | 1.00                   | 1.9(-16.9)  |
| <b>6<sup>s</sup>_AcOH</b> | 2.13              | 2.11              | 2.02              | 2.07              | 2.07              | 1.32                           | 1.39                                                                | 1.07                           | 2.41              | -                 | -          | -                      | -                      | 21.7(-3.6)  |
| <b>6<sup>t</sup>_Pyr</b>  | 2.21              | 2.51              | 2.01              | 2.25              | 2.11              | 1.30                           | 1.64                                                                | 1.00                           | -                 | 2.13              | 0.50       | 0.57                   | 0.60                   | 1.3(-22.5)  |
| <b>6<sup>s</sup>_Pyr</b>  | 2.15              | 2.09              | 2.03              | 2.05              | 2.01              | 1.40                           | 1.01                                                                | 1.57                           | -                 | 2.16              | -          | -                      | -                      | 6.5(-20.4)  |
| <b>6<sup>t</sup>_BQ</b>   | 2.12              | 2.07              | 2.01              | 2.05              | 3.52              | 1.21                           | 2.70                                                                | 0.98                           | 3.95              | -                 | 0          | 0.99                   | 1.00                   | -5.2(-24.8) |
| <b>6<sup>s</sup>_BQ</b>   | 2.14              | 2.12              | 2.02              | 2.05              | 2.08              | 1.32                           | 1.40                                                                | 1.06                           | 2.45              | -                 | -          | -                      | -                      | 25.2(0.8)   |

6. The ligand exchange process between benzoquinone and pyridine of intermediate **12**.

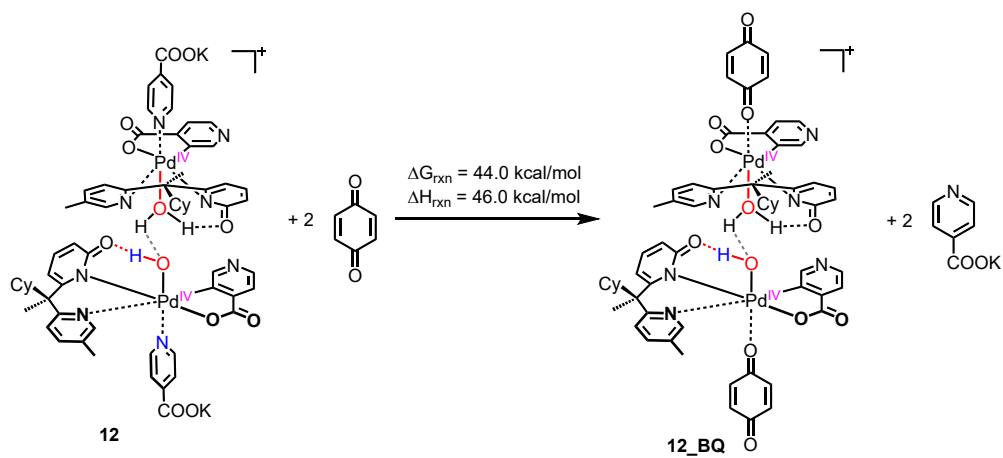

**Figure S5.** The ligand exchange process between benzoquinone and pyridine of intermediate **12**.

7. The reaction pathway of **5** to **6<sup>s</sup>\_Pyr**.

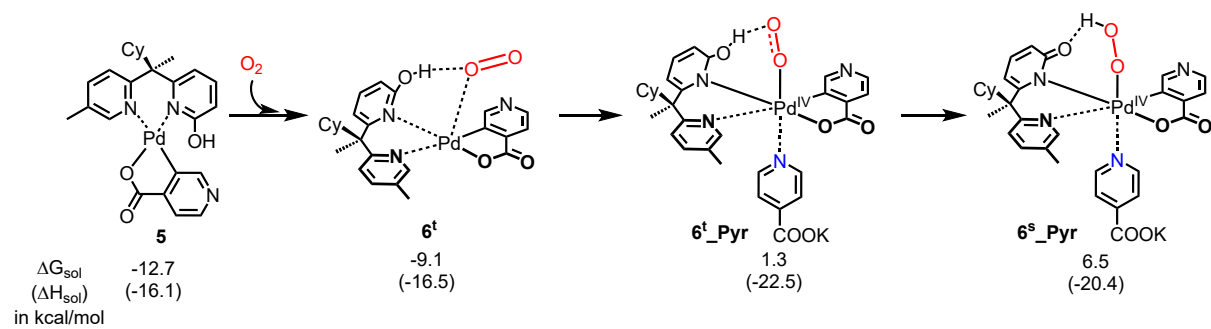

**Figure S6.** The reaction pathway of **5** to **6<sup>s</sup>\_Pyr**.

8. The reaction pathway from **6<sup>s</sup>\_Pyr** to **10**

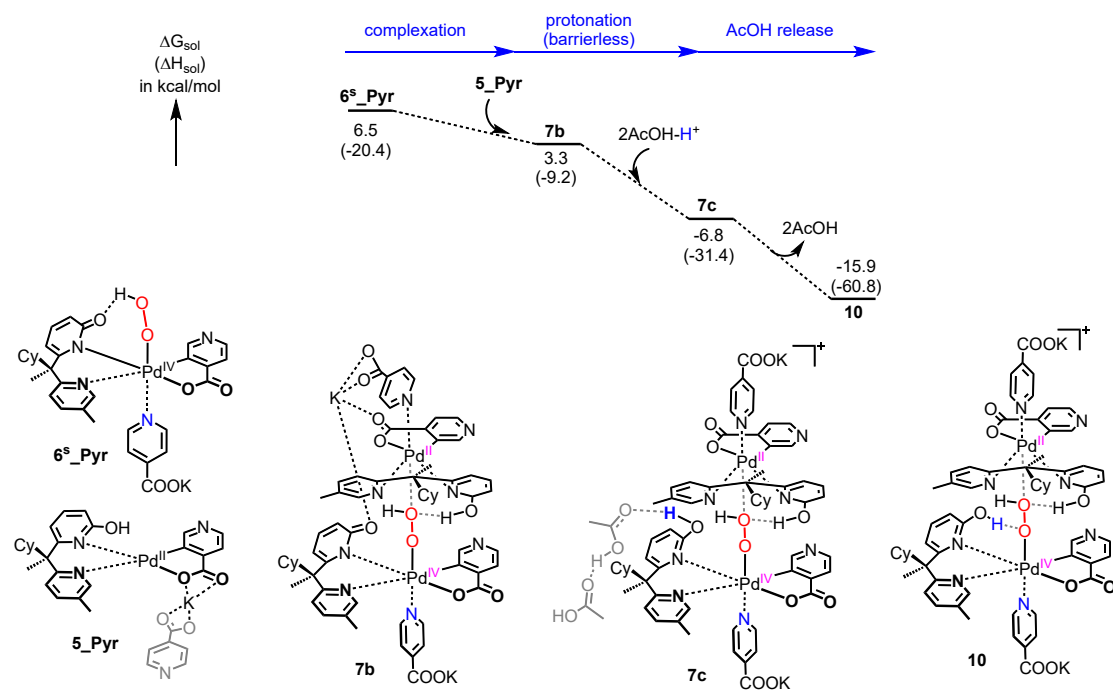

**Figure S7.** The reaction pathway from **6<sup>s</sup>\_Pyr** to **10**.

9. The 3D geometries for the key intermediates  $6^t$ ,  $6^s$ ,  $6^t\_AcOH$ ,  $6^s\_AcOH$ ,  $6^t\_Pyr$ , and  $6^s\_Pyr$ .

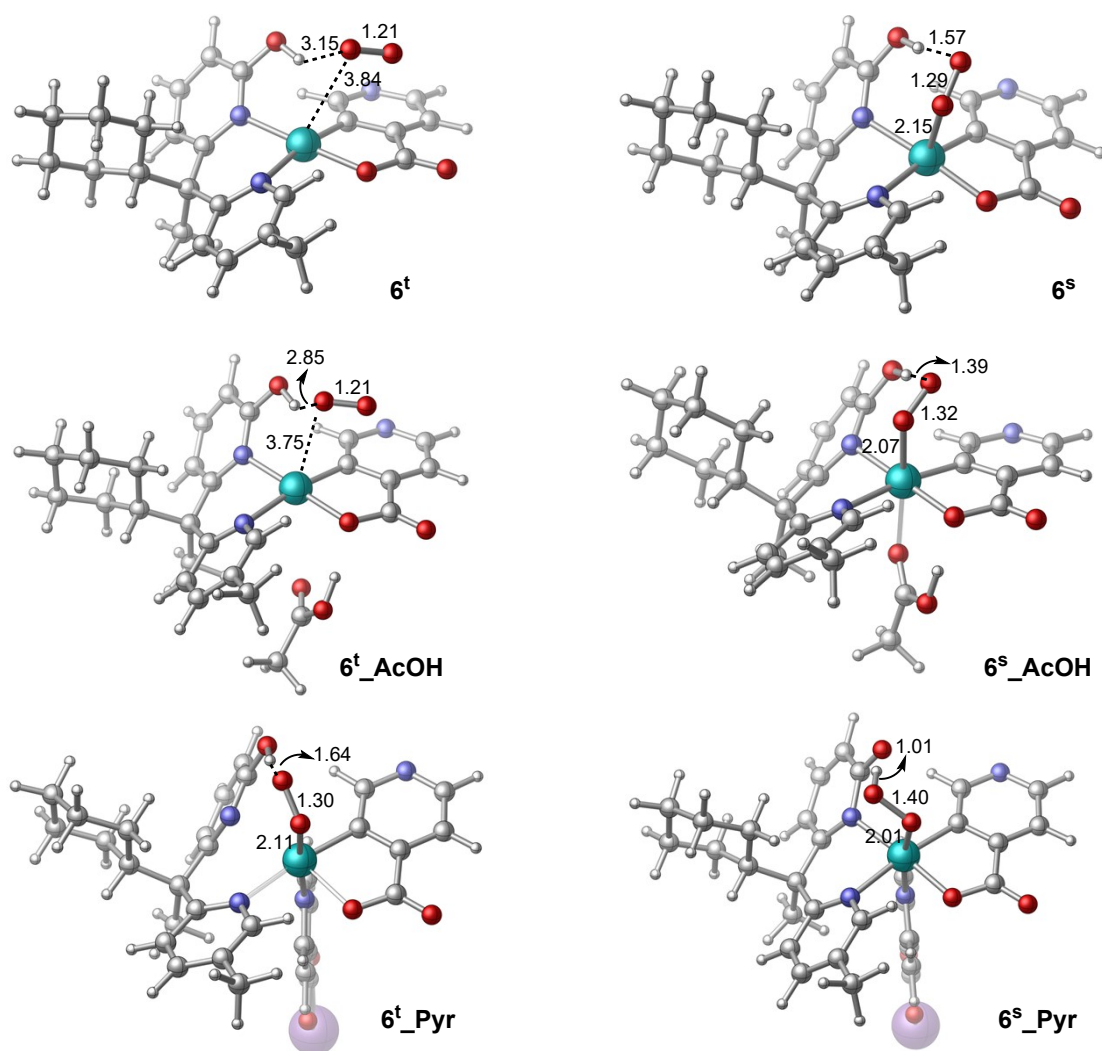

**Figure S8.** The 3D geometries for the key intermediates  $6^t$ ,  $6^s$ ,  $6^t\_AcOH$ ,  $6^s\_AcOH$ ,  $6^t\_Pyr$ , and  $6^s\_Pyr$  (bond distances are given in Å).

10. The 3D geometry of the transition state 11-ts.

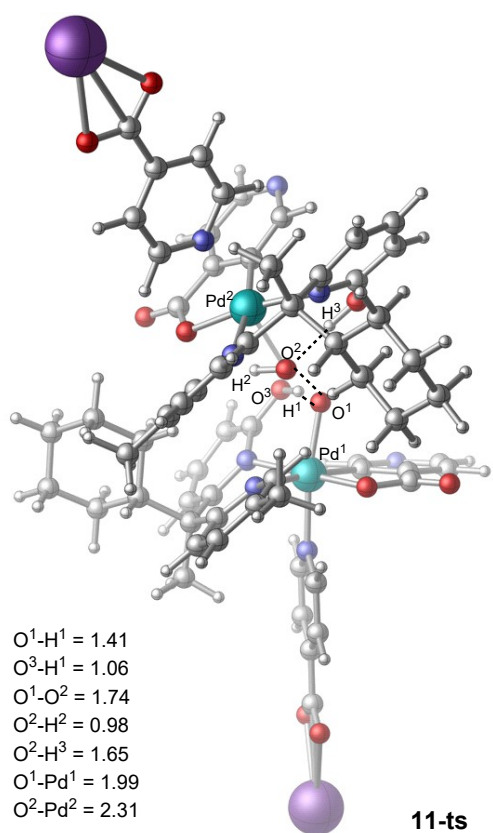

**Figure S9.** The 3D geometries for the transition state **11-ts** (bond distances are given in Å).

11. Energetics for all calculated species

| Species                       | Thermal correction to enthalpy | Thermal correction to free energy | High-level Single point energy in solvent | EE + Thermal Enthalpy Correction | EE + Thermal Free Energy Correction | Imaginary Frequency (cm <sup>-1</sup> *i) |
|-------------------------------|--------------------------------|-----------------------------------|-------------------------------------------|----------------------------------|-------------------------------------|-------------------------------------------|
| <b>H<sup>+</sup></b>          | 0.002360                       | -0.010000                         | -0.213677                                 | -0.211317                        | -0.223677                           |                                           |
| <b>2AcOH-H<sup>+</sup></b>    | 0.146809                       | 0.098579                          | -458.792132                               | -458.645323                      | -458.693553                         |                                           |
| <b>2DMF-H<sup>+</sup></b>     | 0.233289                       | 0.176585                          | -497.691675                               | -497.458386                      | -497.515090                         |                                           |
| <b>DMF-H<sup>+</sup></b>      | 0.123530                       | 0.087148                          | -249.048877                               | -248.925347                      | -248.961729                         |                                           |
| <b>sub</b>                    | 0.111935                       | 0.071715                          | -437.024086                               | -436.912151                      | -436.952371                         |                                           |
| <b>KOAc</b>                   | 0.057130                       | 0.017535                          | -828.595484                               | -828.538354                      | -828.577949                         |                                           |
| <b>subK</b>                   | 0.101984                       | 0.055642                          | -1036.445299                              | -1036.343315                     | -1036.389657                        |                                           |
| <b>HOAc</b>                   | 0.067248                       | 0.034521                          | -229.182133                               | -229.114885                      | -229.147612                         |                                           |
| <b>AcOOH</b>                  | 0.070462                       | 0.037025                          | -304.334974                               | -304.264512                      | -304.297949                         |                                           |
| <b>O<sub>2</sub> triplet</b>  | 0.007088                       | -0.016198                         | -150.381320                               | -150.374232                      | -150.397518                         |                                           |
| <b>La</b>                     | 0.418593                       | 0.348685                          | -923.585225                               | -923.166632                      | -923.236540                         |                                           |
| <b>L</b>                      | 0.419495                       | 0.350227                          | -923.599081                               | -923.179586                      | -923.248854                         |                                           |
| <b>PdOAc<sub>2</sub></b>      | 0.114565                       | 0.063633                          | -585.099595                               | -584.985030                      | -585.035962                         |                                           |
| <b>1</b>                      | 0.534406                       | 0.437185                          | -1508.744799                              | -1508.210393                     | -1508.307614                        |                                           |
| <b>1'</b>                     | 0.535588                       | 0.438521                          | -1508.746112                              | -1508.210524                     | -1508.307591                        |                                           |
| <b>2(subK<sub>2</sub>DMF)</b> | 0.570837                       | 0.462105                          | -2316.035193                              | -2315.464356                     | -2315.573088                        |                                           |
| <b>3</b>                      | 0.512084                       | 0.420089                          | -1487.391336                              | -1486.879252                     | -1486.971247                        |                                           |
| <b>4-ts</b>                   | 0.506233                       | 0.417811                          | -1487.358447                              | -1486.852214                     | -1486.940636                        | -1124.82                                  |
| <b>5</b>                      | 0.512274                       | 0.423347                          | -1487.392561                              | -1486.880287                     | -1486.969214                        |                                           |
| <b>2</b>                      | 0.570894                       | 0.463816                          | -2316.000103                              | -2315.429209                     | -2315.536287                        |                                           |
| <b>6<sup>s</sup></b>          | 0.519824                       | 0.424840                          | -1637.732725                              | -1637.212901                     | -1637.307885                        |                                           |
| <b>6<sup>t</sup></b>          | 0.520890                       | 0.418298                          | -1637.776129                              | -1637.255239                     | -1637.357831                        |                                           |
| <b>6<sup>s</sup>_AcOH</b>     | 0.587723                       | 0.480902                          | -1866.937258                              | -1866.349535                     | -1866.456356                        |                                           |
| <b>6<sup>t</sup>_AcOH</b>     | 0.590140                       | 0.472780                          | -1866.960818                              | -1866.370678                     | -1866.488038                        |                                           |
| <b>6<sup>t</sup>_Pyr</b>      | 0.624456                       | 0.501547                          | -2674.232549                              | -2673.608093                     | -2673.731002                        |                                           |
| <b>6<sup>s</sup>_Pyr</b>      | 0.624815                       | 0.506815                          | -2674.229577                              | -2673.604762                     | -2673.722762                        |                                           |
| <b>5_Pyr</b>                  | 0.616042                       | 0.502377                          | -2523.873067                              | -2523.257025                     | -2523.370690                        |                                           |
| <b>8-ts</b>                   | 1.239857                       | 1.031452                          | -5198.070641                              | -5196.830784                     | -5197.039189                        | -291.71                                   |
| <b>13-ts'</b>                 | 0.617952                       | 0.501569                          | -2599.025154                              | -2598.407202                     | -2598.523585                        | -381.74                                   |
| <b>10</b>                     | 1.256240                       | 1.048913                          | -5198.564513                              | -5197.308273                     | -5197.515600                        |                                           |
| <b>11-ts</b>                  | 1.253767                       | 1.047247                          | -5198.548220                              | -5197.294453                     | -5197.500973                        | -337.24                                   |
| <b>12</b>                     | 1.254097                       | 1.049456                          | -5198.628996                              | -5197.374899                     | -5197.579540                        |                                           |
| <b>7'</b>                     | 0.632791                       | 0.517768                          | -2599.527715                              | -2598.894924                     | -2599.009947                        |                                           |
| <b>7</b>                      | 0.620651                       | 0.505127                          | -2599.062485                              | -2598.441834                     | -2598.557358                        |                                           |
| <b>13-ts</b>                  | 0.513869                       | 0.424321                          | -1562.563235                              | -1562.049366                     | -1562.138914                        | -286.56                                   |



|                         |          |          |              |              |              |  |
|-------------------------|----------|----------|--------------|--------------|--------------|--|
| <b>14</b>               | 0.517682 | 0.424245 | -1562.640539 | -1562.122857 | -1562.216294 |  |
| <b>1b</b>               | 0.466977 | 0.382028 | -1279.536044 | -1279.069067 | -1279.154016 |  |
| <b>7b</b>               | 1.244264 | 1.035488 | -5198.120671 | -5196.876407 | -5197.085183 |  |
| <b>7c</b>               | 1.396296 | 1.161643 | -5656.953427 | -5655.557131 | -5655.791784 |  |
| <b>7d</b>               | 0.515606 | 0.424562 | -1562.575300 | -1562.059694 | -1562.150738 |  |
| <b>12_BQ</b>            | 1.233231 | 1.042577 | -3888.861996 | -3887.628765 | -3887.819419 |  |
| <b>6<sup>t</sup>_BQ</b> | 0.615531 | 0.49446  | -2019.390891 | -2018.775360 | -2018.896431 |  |
| <b>6<sup>s</sup>_BQ</b> | 0.613119 | 0.499661 | -2019.34763  | -2018.734511 | -2018.847969 |  |

12. Cartesian coordinates for all species

**H<sup>+</sup>**

H 0.00000000 0.00000000 0.00000000

**2AcOH-H<sup>+</sup>**

C 1.98814100 -0.02590400 -0.04817900  
 O 1.11867900 0.55148600 -0.75691300  
 O 3.18424700 0.48245000 0.00562700  
 H 3.23782900 1.29445500 -0.54262600  
 C 1.74446100 -1.25071500 0.75074200  
 H 1.25346400 -2.00395600 0.12880600  
 H 2.67784700 -1.64046500 1.15362600  
 H 1.06833900 -0.99915400 1.57606500  
 H 0.10086800 0.07988500 -0.74686100  
 C -1.97602200 0.01700100 -0.06025000  
 O -1.07185000 -0.48064100 -0.76103100  
 O -3.16149500 -0.54650100 -0.03175800  
 H -3.16025500 -1.33650600 -0.61084800  
 C -1.82620600 1.24308000 0.77147700  
 H -1.56332100 2.08237300 0.11952000  
 H -2.74602800 1.46925900 1.30855000  
 H -1.00763200 1.09899200 1.48363100

**2DMF-H<sup>+</sup>**

H -0.09706200 -0.94260100 0.02393200  
 C 1.81957200 -0.04295100 0.29168800  
 H 1.35793200 0.56302800 1.07842700  
 O 1.14532900 -0.89331000 -0.35706900  
 N 3.10369000 0.18445100 0.08645100  
 C 3.86249700 -0.54400900 -0.92600100  
 H 3.21138900 -1.26221400 -1.42034600  
 H 4.26096500 0.16209600 -1.66055200  
 H 4.69586700 -1.06708300 -0.44801400  
 C 3.82983000 1.18386300 0.86364800  
 H 3.15684400 1.65958500 1.57803900  
 H 4.65164900 0.70425700 1.40335500  
 H 4.24157100 1.94319800 0.19226400  
 C -1.81678100 -0.02363800 -0.27998700  
 H -1.31406100 0.61350400 -1.00971800  
 O -1.16664500 -0.93500900 0.34047800

N -3.09140000 0.19485400 -0.08286500  
 C -3.88077000 -0.59017300 0.86630500  
 H -3.25151400 -1.34207400 1.33721600  
 H -4.29314800 0.07968300 1.62556000  
 H -4.70197800 -1.07388700 0.33094500  
 C -3.79753600 1.25016800 -0.80930600  
 H -3.11029100 1.76235400 -1.48300400  
 H -4.61384200 0.80641000 -1.38510400  
 H -4.21069700 1.96561100 -0.09343800

**DMF-H<sup>+</sup>**

H -2.63172200 -0.61350000 0.00061900  
 C -0.74743300 -0.65760200 -0.00022400  
 H -0.75448500 -1.74444500 -0.00012400  
 O -1.87875900 0.00621600 0.00011600  
 N 0.38128600 -0.03038900 -0.00035000  
 C 0.48542800 1.43365200 0.00002800  
 H -0.50319400 1.88577700 -0.00435600  
 H 1.03364600 1.73765100 0.89443300  
 H 1.04128100 1.73732100 -0.88971100  
 C 1.64599800 -0.77533700 0.00016200  
 H 1.44785000 -1.84661200 0.00018000  
 H 2.21216700 -0.49879200 -0.89187600  
 H 2.21157500 -0.49868000 0.89256100

**sub**

C 1.86260000 -1.17080800 -0.00002300  
 C 0.46859900 -1.19337400 -0.00002300  
 C -0.21259100 0.02706600 -0.00000300  
 C 0.53026700 1.21015300 0.00002100  
 C 1.92003800 1.12165700 0.00002400  
 N 2.58691200 -0.04242200 0.00000100  
 H 2.42047500 -2.10445300 -0.00004100  
 H -0.06525100 -2.13576300 -0.00004100  
 H 0.03032600 2.17158300 0.00004400  
 H 2.52373600 2.02632100 0.00005100  
 C -1.70141900 0.11782700 -0.00000700  
 O -2.32205100 1.16357400 -0.00005300  
 O -2.29819300 -1.08890600 0.00005300  
 H -3.26069700 -0.93320200 0.00005300

**KOAc**

C 0.99491800 0.00987000 0.00011500  
 O 0.41334900 1.13528700 0.00013600

|              |             |             |             |                              |             |             |             |
|--------------|-------------|-------------|-------------|------------------------------|-------------|-------------|-------------|
| O            | 0.41954100  | -1.12000500 | 0.00003600  | <b>O<sub>2</sub>_triplet</b> |             |             |             |
| C            | 2.52890700  | -0.00282600 | 0.00001000  | O                            | 0.00000000  | 0.00000000  | 0.60697700  |
| H            | 2.89473400  | -0.54310300 | 0.88060000  | O                            | 0.00000000  | 0.00000000  | -0.60697700 |
| H            | 2.89462800  | -0.54329000 | -0.88050900 |                              |             |             |             |
| H            | 2.94251100  | 1.00841300  | -0.00011500 | <b>La</b>                    |             |             |             |
| K            | -1.92305000 | -0.00455500 | -0.00011100 | C                            | -1.35532300 | -0.39046800 | 0.46723700  |
|              |             |             |             | C                            | -1.89883900 | -1.60703200 | 0.03481500  |
| <b>subK</b>  |             |             |             | C                            | -3.24714900 | -1.67192100 | -0.30491800 |
| C            | -2.94057500 | -1.14468100 | -0.00003400 | C                            | -4.05043200 | -0.53127800 | -0.20454800 |
| C            | -1.54802200 | -1.19596000 | -0.00006800 | C                            | -3.42065900 | 0.62548100  | 0.26496900  |
| C            | -0.82562200 | 0.00000700  | 0.00000800  | N                            | -2.12637200 | 0.70237700  | 0.59448800  |
| C            | -1.54803000 | 1.19595800  | 0.00011400  | H                            | -3.67572800 | -2.61060200 | -0.64725100 |
| C            | -2.94059800 | 1.14465300  | 0.00013900  | H                            | -1.28639700 | -2.49753900 | -0.03285300 |
| N            | -3.64253100 | -0.00000900 | 0.00006700  | H                            | -4.00104400 | 1.54035100  | 0.38398600  |
| H            | -3.52170200 | -2.06534500 | -0.00009000 | C                            | 0.09171100  | -0.24388900 | 0.96522700  |
| H            | -1.02047300 | -2.14283400 | -0.00015100 | C                            | -0.01741000 | -0.42123500 | 2.49937500  |
| H            | -1.02051800 | 2.14285300  | 0.00017600  | H                            | -0.42549000 | -1.41183500 | 2.72190500  |
| H            | -3.52171900 | 2.06532300  | 0.00022100  | H                            | 0.94373000  | -0.33542700 | 3.00887700  |
| C            | 0.69763200  | 0.00001800  | -0.00001600 | H                            | -0.69566300 | 0.32688000  | 2.91909900  |
| O            | 1.26782800  | 1.12877700  | 0.00009100  | C                            | 1.04749800  | -1.34793400 | 0.38642200  |
| O            | 1.26783000  | -1.12873300 | -0.00012500 | C                            | 1.10686400  | -1.42987900 | -1.15153100 |
| K            | 3.62779700  | -0.00001400 | -0.00006400 | C                            | 2.48945000  | -1.24412500 | 0.92180900  |
|              |             |             |             | H                            | 0.64817200  | -2.30415500 | 0.75254900  |
| <b>HOAc</b>  |             |             |             | C                            | 1.92386000  | -2.64600300 | -1.60741500 |
| C            | -0.09038600 | 0.12150300  | -0.00001600 | H                            | 1.57108400  | -0.51787900 | -1.54053000 |
| O            | -0.64511200 | 1.20208900  | -0.00004900 | H                            | 0.10346100  | -1.46952500 | -1.58390300 |
| O            | -0.77732300 | -1.04301000 | 0.00004900  | C                            | 3.33809000  | -2.44259800 | 0.47436200  |
| H            | -1.72403700 | -0.81038300 | 0.00005300  | H                            | 2.94624800  | -0.31740700 | 0.55068800  |
| C            | 1.39442400  | -0.10951300 | 0.00000100  | H                            | 2.50143600  | -1.18436600 | 2.01373100  |
| H            | 1.68073100  | -0.69005800 | 0.88263300  | C                            | 3.35083800  | -2.59480900 | -1.05044300 |
| H            | 1.68073000  | -0.69032000 | -0.88245600 | H                            | 1.94431100  | -2.69252900 | -2.70309100 |
| H            | 1.91782600  | 0.84619300  | -0.00013300 | H                            | 1.43132700  | -3.56632800 | -1.26197600 |
|              |             |             |             | H                            | 4.36102500  | -2.33661400 | 0.85568400  |
| <b>AcOOH</b> |             |             |             | H                            | 2.92806900  | -3.35748600 | 0.92505900  |
| C            | -0.42033900 | 0.17035300  | 0.00015300  | H                            | 3.91154700  | -3.49183700 | -1.34042000 |
| O            | -0.10038600 | 1.34541600  | 0.00008200  | H                            | 3.87559000  | -1.73615400 | -1.49265400 |
| O            | 0.51952100  | -0.80977400 | 0.00023400  | C                            | 0.61907800  | 1.14477200  | 0.59229500  |
| C            | -1.80255000 | -0.40358000 | -0.00015000 | C                            | 1.28713800  | 1.96888800  | 1.50033100  |
| H            | -1.94941400 | -1.02915100 | -0.88552400 | N                            | 0.44191000  | 1.51192800  | -0.69226200 |
| H            | -1.94969600 | -1.02936000 | 0.88502400  | C                            | 1.77510200  | 3.20223900  | 1.05769100  |
| H            | -2.52474100 | 0.41275400  | -0.00017700 | H                            | 1.42817500  | 1.67080400  | 2.53033100  |
| O            | 1.84906300  | -0.24461000 | -0.00015600 | C                            | 0.91124700  | 2.68386800  | -1.09887400 |
| H            | 1.61559900  | 0.71685800  | -0.00062100 | C                            | 1.59100000  | 3.58406400  | -0.26303000 |
|              |             |             |             | H                            | 2.29508700  | 3.86203600  | 1.74602800  |

|          |             |             |             |                          |             |             |             |
|----------|-------------|-------------|-------------|--------------------------|-------------|-------------|-------------|
| H        | 1.95373700  | 4.53566600  | -0.63963300 | C                        | 0.93355700  | 1.04242600  | 0.71723500  |
| O        | 0.68094600  | 2.95529200  | -2.41008500 | C                        | 2.00772300  | 1.48328100  | 1.46019300  |
| H        | 1.05597500  | 3.82480100  | -2.61992500 | N                        | 0.63044800  | 1.72803900  | -0.42246300 |
| C        | -5.50834300 | -0.54244400 | -0.57555800 | C                        | 2.73998000  | 2.61242500  | 1.01000600  |
| H        | -5.98828800 | 0.40702800  | -0.32175500 | H                        | 2.30866200  | 0.98346400  | 2.36777300  |
| H        | -5.64118900 | -0.70915900 | -1.65113000 | C                        | 1.28056400  | 2.85797500  | -0.93047000 |
| H        | -6.04383200 | -1.34538500 | -0.05701400 | C                        | 2.40815000  | 3.28282600  | -0.13694300 |
|          |             |             |             | H                        | 3.58867100  | 2.94805400  | 1.60090800  |
| <b>L</b> |             |             |             | H                        | 2.96562800  | 4.14737200  | -0.47999600 |
| C        | -2.97139500 | 0.53405800  | -0.92402700 | O                        | 0.86609300  | 3.38851700  | -1.97143000 |
| C        | -1.37645500 | -0.11950700 | 0.64354300  | H                        | -0.22827800 | 1.42433700  | -0.90369300 |
| C        | -2.38844000 | -0.70754200 | 1.41876100  |                          |             |             |             |
| C        | -3.70850000 | -0.65973100 | 0.98398100  | <b>PdOAc<sub>2</sub></b> |             |             |             |
| C        | -4.03674800 | -0.02529800 | -0.21890200 | Pd                       | 0.00000500  | 0.00002500  | -0.00031400 |
| H        | -3.14862000 | 1.04775000  | -1.86690100 | C                        | -2.45078300 | -0.00002600 | -0.02596500 |
| H        | -2.16456000 | -1.20124000 | 2.35368600  | O                        | -1.77095900 | -1.08723200 | -0.03255200 |
| H        | -4.48918500 | -1.11682700 | 1.58646800  | O                        | -1.77076100 | 1.08709300  | -0.03242700 |
| N        | -1.69784700 | 0.48072800  | -0.51592200 | C                        | -3.93690100 | 0.00007400  | 0.02756300  |
| C        | 0.11660800  | -0.22182300 | 1.04171500  | H                        | -4.24703400 | -0.00358500 | 1.07909500  |
| C        | 0.72730600  | -1.46886400 | 0.26215000  | H                        | -4.33275400 | 0.89972700  | -0.44773000 |
| C        | 0.71774600  | -1.34096900 | -1.27137300 | H                        | -4.33314300 | -0.89622300 | -0.45376400 |
| C        | 2.14645400  | -1.84329600 | 0.72881900  | C                        | 2.45075700  | 0.00005000  | 0.02635100  |
| H        | 0.06042900  | -2.30123900 | 0.52911800  | O                        | 1.77097600  | 1.08726900  | 0.03250600  |
| C        | 1.20008500  | -2.63243600 | -1.94698100 | O                        | 1.77073400  | -1.08706200 | 0.03264900  |
| H        | 1.37832500  | -0.51760300 | -1.57067900 | C                        | 3.93689600  | -0.00016300 | -0.02643400 |
| H        | -0.28198800 | -1.08928400 | -1.63242100 | H                        | 4.33255300  | -0.89650700 | 0.45527900  |
| C        | 2.64444200  | -3.12900700 | 0.05290400  | H                        | 4.24754900  | -0.00413800 | -1.07781200 |
| H        | 2.83105400  | -1.01963900 | 0.49077300  | H                        | 4.33289000  | 0.89942800  | 0.44888400  |
| H        | 2.17758800  | -1.97878100 | 1.81285700  |                          |             |             |             |
| C        | 2.60299000  | -3.02241900 | -1.47378900 | <b>I</b>                 |             |             |             |
| H        | 1.18321500  | -2.50575400 | -3.03612300 | C                        | -1.19584500 | 1.42947100  | 0.61580800  |
| H        | 0.49941800  | -3.44648900 | -1.71337400 | C                        | -1.84630700 | 2.66192200  | 0.80527900  |
| H        | 3.66208700  | -3.35233800 | 0.39524200  | C                        | -1.32963300 | 3.83591700  | 0.28468300  |
| H        | 2.01312300  | -3.96975700 | 0.37315900  | C                        | -0.14149500 | 3.81474100  | -0.45654400 |
| H        | 2.91581500  | -3.96796300 | -1.93303500 | C                        | 0.49765800  | 2.58907300  | -0.55166900 |
| H        | 3.31998900  | -2.25689900 | -1.80257400 | N                        | -0.00421300 | 1.45453500  | -0.00972100 |
| C        | 0.19969200  | -0.50378600 | 2.55720200  | H                        | -1.85502600 | 4.77281100  | 0.44517100  |
| H        | 1.22478300  | -0.50599900 | 2.91882700  | H                        | -2.77235700 | 2.70022300  | 1.36247700  |
| H        | -0.35525300 | 0.24842100  | 3.12437600  | H                        | 1.44993400  | 2.49061600  | -1.05416600 |
| H        | -0.21083100 | -1.48897100 | 2.78749800  | C                        | -1.91748900 | 0.14504100  | 1.08830100  |
| C        | -5.45027000 | 0.05211700  | -0.72479300 | C                        | -2.11043900 | 0.27339100  | 2.61659600  |
| H        | -6.09763700 | 0.56569100  | -0.00516000 | H                        | -2.68592700 | 1.16719700  | 2.86609700  |
| H        | -5.50214900 | 0.59096000  | -1.67466600 | H                        | -2.63909800 | -0.58361700 | 3.03276800  |
| H        | -5.86816600 | -0.94934400 | -0.87731600 | H                        | -1.13510900 | 0.34321700  | 3.10796400  |

|    |             |             |             |    |             |             |             |
|----|-------------|-------------|-------------|----|-------------|-------------|-------------|
| C  | -3.31391200 | 0.19612400  | 0.31136100  | H  | 5.48297900  | -1.27747200 | 0.07587900  |
| C  | -3.12881000 | 0.01065700  | -1.20460500 | H  | 5.01108700  | -2.29209000 | 1.45179700  |
| C  | -4.44416500 | -0.71756000 | 0.81006500  | H  | 2.23737600  | -2.43276600 | -1.48328200 |
| H  | -3.68799400 | 1.21160900  | 0.46719500  |    |             |             |             |
| C  | -4.42769900 | 0.32323500  | -1.95909600 | I' |             |             |             |
| H  | -2.82826000 | -1.02469400 | -1.41005300 | C  | -1.06007500 | 1.49479200  | 0.59091500  |
| H  | -2.32043200 | 0.65088200  | -1.57557200 | C  | -1.62571500 | 2.77730900  | 0.70596500  |
| C  | -5.75288400 | -0.37290900 | 0.08108100  | C  | -0.99214400 | 3.89008400  | 0.17984700  |
| H  | -4.20596500 | -1.76593400 | 0.60916400  | C  | 0.22788100  | 3.75070300  | -0.49352200 |
| H  | -4.58117500 | -0.61447000 | 1.89140600  | C  | 0.77122400  | 2.47616700  | -0.52289700 |
| C  | -5.59777200 | -0.51904400 | -1.43739300 | N  | 0.15640700  | 1.40283000  | 0.02889100  |
| H  | -4.28524100 | 0.15529300  | -3.03320100 | H  | -1.44950900 | 4.86972900  | 0.28344700  |
| H  | -4.66419400 | 1.38917200  | -1.83433000 | H  | -2.57349800 | 2.90383400  | 1.21061500  |
| H  | -6.55844500 | -1.02146700 | 0.44528100  | H  | 1.73204700  | 2.27867600  | -0.98269700 |
| H  | -6.04427400 | 0.65911600  | 0.32131300  | C  | -1.88330000 | 0.28464400  | 1.08113800  |
| H  | -6.52735500 | -0.23641800 | -1.94583900 | C  | -2.10676100 | 0.49224800  | 2.59823200  |
| H  | -5.41418600 | -1.57582400 | -1.67702000 | H  | -2.60554300 | 1.44457400  | 2.78874300  |
| C  | -1.29223900 | -1.22346400 | 0.75226400  | H  | -2.72441900 | -0.29019600 | 3.03710100  |
| C  | -1.89008200 | -2.38028900 | 1.23189000  | H  | -1.14314200 | 0.49817500  | 3.11652100  |
| N  | -0.28465100 | -1.32926300 | -0.15505800 | C  | -3.25410000 | 0.39768100  | 0.26473900  |
| C  | -1.55080200 | -3.61911600 | 0.65788500  | C  | -3.04347500 | 0.15618000  | -1.24002600 |
| H  | -2.64872800 | -2.33756300 | 1.99824600  | C  | -4.45270200 | -0.42853200 | 0.75724600  |
| C  | 0.01801300  | -2.50312300 | -0.80569200 | H  | -3.56576800 | 1.43865400  | 0.38422600  |
| C  | -0.65797000 | -3.68392200 | -0.38703600 | C  | -4.29931000 | 0.53181200  | -2.03717000 |
| H  | -2.02832600 | -4.52323300 | 1.02514600  | H  | -2.81093700 | -0.90302800 | -1.40910600 |
| H  | -0.40937300 | -4.61649900 | -0.88088500 | H  | -2.18401600 | 0.72859600  | -1.60668100 |
| O  | 0.88890500  | -2.49673000 | -1.74257600 | C  | -5.71777500 | -0.02250300 | -0.01632800 |
| C  | 0.43350000  | 5.04781900  | -1.09284100 | H  | -4.27803700 | -1.49561100 | 0.59086500  |
| H  | 1.41396100  | 4.84740700  | -1.53198900 | H  | -4.61167700 | -0.28654900 | 1.83107200  |
| H  | -0.22668300 | 5.41830200  | -1.88504800 | C  | -5.53401800 | -0.21942800 | -1.52574100 |
| H  | 0.54098400  | 5.85089900  | -0.35629700 | H  | -4.14066000 | 0.32546000  | -3.10223200 |
| Pd | 1.28230200  | -0.06765400 | 0.16125600  | H  | -4.46898000 | 1.61371500  | -1.94657100 |
| C  | 3.78412200  | 1.31653200  | -0.02196400 | H  | -6.57169600 | -0.60905500 | 0.34255500  |
| O  | 3.90971800  | 0.72229500  | -1.09925700 | H  | -5.94891200 | 1.03185900  | 0.18936400  |
| O  | 2.73753700  | 1.25799400  | 0.74937200  | H  | -6.43040200 | 0.10809400  | -2.06577700 |
| C  | 4.89853400  | 2.18870100  | 0.53494300  | H  | -5.41301900 | -1.29186500 | -1.73351400 |
| H  | 4.49708200  | 3.11170400  | 0.96175100  | C  | -1.35957900 | -1.14281500 | 0.81506600  |
| H  | 5.40824300  | 1.64731600  | 1.34030800  | C  | -2.05954800 | -2.20826500 | 1.36742500  |
| H  | 5.62524600  | 2.42217400  | -0.24552900 | N  | -0.37528600 | -1.39572000 | -0.10072200 |
| C  | 3.54568100  | -2.06494000 | -0.09119100 | C  | -1.87707700 | -3.50126200 | 0.86061100  |
| O  | 2.69611900  | -1.55648800 | 0.68112900  | H  | -2.78804700 | -2.04397200 | 2.14538700  |
| O  | 3.28546900  | -2.49545500 | -1.27911000 | C  | -0.23238600 | -2.62992700 | -0.64298300 |
| C  | 4.96714300  | -2.19984500 | 0.36561900  | C  | -1.01489900 | -3.70953300 | -0.19364300 |
| H  | 5.46274500  | -3.04412500 | -0.11602900 | H  | -2.44105400 | -4.32854000 | 1.27985500  |

|                               |             |             |             |    |             |             |             |
|-------------------------------|-------------|-------------|-------------|----|-------------|-------------|-------------|
| H                             | -0.87041700 | -4.68082600 | -0.65054700 | H  | 2.63757600  | 1.25595600  | 1.52660100  |
| O                             | 0.62127600  | -2.85575100 | -1.62082500 | C  | 5.78353100  | -0.93612600 | 0.59164200  |
| C                             | 0.93503600  | 4.91299400  | -1.13079200 | H  | 3.98816100  | -2.10689800 | 0.48944300  |
| H                             | 1.91649300  | 4.61871800  | -1.51092000 | H  | 4.57965700  | -1.59328500 | -1.09025200 |
| H                             | 0.34943900  | 5.31222000  | -1.96648900 | C  | 5.60527100  | -0.48954200 | 2.04742200  |
| H                             | 1.07192000  | 5.72696600  | -0.41113100 | H  | 4.46522600  | 0.95778200  | 3.19979500  |
| Pd                            | 1.30761200  | -0.23551900 | 0.23187200  | H  | 5.08321900  | 1.57237100  | 1.66904400  |
| C                             | 3.75745600  | 1.31398600  | 0.12804200  | H  | 6.44047900  | -1.81258100 | 0.54041700  |
| O                             | 3.70444400  | 1.21218000  | -1.10238700 | H  | 6.27766700  | -0.13668500 | 0.02204200  |
| O                             | 2.84341300  | 0.90650100  | 0.96019100  | H  | 6.57403300  | -0.22588400 | 2.48859300  |
| C                             | 4.93635300  | 1.98197900  | 0.82100900  | H  | 5.20920700  | -1.33135100 | 2.63269700  |
| H                             | 4.59070800  | 2.85498300  | 1.38450800  | C  | 1.22976200  | -1.11032500 | -0.01540300 |
| H                             | 5.39229200  | 1.29131800  | 1.53732800  | C  | 1.59037900  | -2.44749300 | 0.04292700  |
| H                             | 5.68162800  | 2.29522900  | 0.08784800  | N  | 0.21765400  | -0.66183900 | 0.77154600  |
| C                             | 3.33577300  | -2.14499100 | -0.42829000 | C  | 1.01531200  | -3.26972600 | 1.03518300  |
| O                             | 2.59304400  | -1.82517000 | 0.57339200  | H  | 2.34742900  | -2.85125800 | -0.61085700 |
| O                             | 2.98197700  | -2.05342300 | -1.62723400 | C  | -0.31864100 | -1.39665100 | 1.82776500  |
| C                             | 4.71909300  | -2.64490200 | -0.08170300 | C  | 0.13139600  | -2.75441300 | 1.94902900  |
| H                             | 5.15211200  | -3.20371800 | -0.91293400 | H  | 1.30587400  | -4.31561800 | 1.08763100  |
| H                             | 5.35333800  | -1.77553800 | 0.12840900  | H  | -0.29917700 | -3.35882200 | 2.74036800  |
| H                             | 4.69452700  | -3.26203400 | 0.81964600  | O  | -1.17093900 | -0.87036700 | 2.58846700  |
| H                             | 1.49428500  | -2.31094400 | -1.63015000 | C  | 0.93834900  | 5.61675400  | -0.68813400 |
|                               |             |             |             | H  | -0.03294100 | 5.80522200  | -0.22364200 |
| <b>2(subK<sub>2</sub>DMF)</b> |             |             |             | H  | 1.70840400  | 6.10477600  | -0.08022700 |
| C                             | 1.68457500  | 1.36580200  | -0.88055400 | H  | 0.94987500  | 6.09513800  | -1.67311100 |
| C                             | 2.56486200  | 2.27169600  | -1.49938200 | Pd | -1.04581100 | 0.68870700  | -0.06240700 |
| C                             | 2.33251600  | 3.63644300  | -1.47077100 | C  | -3.19962200 | 2.57627600  | -0.15367400 |
| C                             | 1.20906800  | 4.14380200  | -0.80625800 | O  | -3.28928300 | 2.34421100  | 1.06705800  |
| C                             | 0.33495100  | 3.20541500  | -0.28079600 | O  | -2.29856400 | 2.08956900  | -0.94411300 |
| N                             | 0.55542300  | 1.87182500  | -0.34645600 | C  | -4.21362600 | 3.47780000  | -0.83693100 |
| H                             | 3.03171200  | 4.31264600  | -1.95401700 | H  | -3.76806800 | 4.01557600  | -1.67685100 |
| H                             | 3.44875800  | 1.90198200  | -2.00101800 | H  | -5.02667600 | 2.85470300  | -1.22870600 |
| H                             | -0.59038100 | 3.50621400  | 0.19074500  | H  | -4.63905100 | 4.18384900  | -0.12045700 |
| C                             | 2.11975000  | -0.11876000 | -0.79438900 | C  | -0.61467600 | -2.69678400 | -3.00728600 |
| C                             | 2.32835300  | -0.61880800 | -2.24218600 | C  | -1.39436600 | -1.93767300 | -2.13526500 |
| H                             | 3.11827100  | -0.05646900 | -2.74488500 | C  | -1.96497100 | -2.56207500 | -1.02303500 |
| H                             | 2.60751200  | -1.67171900 | -2.27067600 | C  | -1.72600900 | -3.92695200 | -0.84698500 |
| H                             | 1.40310300  | -0.49886200 | -2.81176300 | C  | -0.91541200 | -4.59365100 | -1.76239500 |
| C                             | 3.50395800  | -0.04255500 | 0.00357600  | N  | -0.36140800 | -4.00205900 | -2.83274900 |
| C                             | 3.29499500  | 0.38098800  | 1.46817600  | H  | -0.16805400 | -2.23025200 | -3.88258400 |
| C                             | 4.42948000  | -1.26809600 | -0.05549500 | H  | -1.55302400 | -0.88183800 | -2.32119300 |
| H                             | 4.06906400  | 0.75712400  | -0.48386400 | H  | -2.15571300 | -4.44790400 | 0.00031400  |
| C                             | 4.63399000  | 0.69183000  | 2.14948200  | H  | -0.70053800 | -5.65227000 | -1.63061800 |
| H                             | 2.78907200  | -0.42830100 | 2.00982800  | C  | -2.83734600 | -1.81735900 | -0.04018800 |

|          |             |             |             |             |             |             |             |
|----------|-------------|-------------|-------------|-------------|-------------|-------------|-------------|
| O        | -3.64015800 | -2.44982400 | 0.66167300  | H           | -1.21183000 | -4.85726800 | 0.11842900  |
| O        | -2.74595900 | -0.52575100 | -0.00205700 | O           | 0.28380600  | -2.87883900 | -1.18531100 |
| K        | -3.57846400 | 0.06100200  | 2.39509900  | C           | 2.39941600  | 4.25793700  | -0.05976200 |
| <b>3</b> |             |             |             | H           | 2.90965100  | 3.95322600  | -0.97701900 |
| C        | -0.64473200 | 1.34523100  | 0.94587600  | H           | 1.98930800  | 5.26219600  | -0.20532400 |
| C        | -0.57776300 | 2.57710600  | 1.61815600  | H           | 3.14661900  | 4.32238900  | 0.73960500  |
| C        | 0.38901300  | 3.52619600  | 1.32313100  | Pd          | 0.56454900  | -0.69207100 | -0.93018200 |
| C        | 1.31883600  | 3.28338100  | 0.31095000  | C           | 4.33184100  | 0.27783100  | 1.91222000  |
| C        | 1.20927500  | 2.06005900  | -0.33230500 | C           | 4.18951300  | 0.53704900  | 0.55057400  |
| N        | 0.28757300  | 1.12330600  | -0.01902600 | C           | 3.58166900  | -0.42592000 | -0.25988200 |
| H        | 0.41024000  | 4.46059000  | 1.87616200  | C           | 3.18610000  | -1.62979800 | 0.33549700  |
| H        | -1.29860400 | 2.80973300  | 2.38558400  | C           | 3.39780600  | -1.80137800 | 1.70270800  |
| H        | 1.87685400  | 1.80308800  | -1.14160600 | N           | 3.94620600  | -0.86771400 | 2.49545800  |
| C        | -1.87351800 | 0.43086700  | 1.25002800  | H           | 4.77599400  | 1.02695500  | 2.56487500  |
| C        | -2.31020900 | 0.68002200  | 2.71481000  | H           | 4.52530500  | 1.47946000  | 0.13141200  |
| H        | -2.74584000 | 1.67153100  | 2.83885500  | H           | 2.71991900  | -2.41960800 | -0.24433100 |
| H        | -3.07482900 | -0.02474400 | 3.02815200  | H           | 3.10338400  | -2.73226800 | 2.18354000  |
| H        | -1.46079300 | 0.57694700  | 3.39513000  | C           | 3.36590700  | -0.13268200 | -1.72954000 |
| C        | -3.02834000 | 0.94058200  | 0.27558400  | O           | 2.13879500  | -0.18666500 | -2.16628500 |
| C        | -2.70851900 | 0.78344500  | -1.22049700 | O           | 4.33056800  | 0.17396800  | -2.42781800 |
| C        | -4.40495900 | 0.31859700  | 0.57252800  | <b>4-ts</b> |             |             |             |
| H        | -3.10241500 | 2.01559900  | 0.48911300  | C           | -1.44296700 | 1.21371600  | 0.82648100  |
| C        | -3.79874900 | 1.41837400  | -2.09502800 | C           | -2.19348300 | 2.29071500  | 1.33533800  |
| H        | -2.62774900 | -0.28317800 | -1.46514900 | C           | -1.92833900 | 3.59705200  | 0.96498700  |
| H        | -1.74379300 | 1.23625700  | -1.46266300 | C           | -0.89917300 | 3.87151700  | 0.05702300  |
| C        | -5.49961900 | 0.95618000  | -0.29535200 | C           | -0.15425300 | 2.78373000  | -0.36854500 |
| H        | -4.36789100 | -0.75822600 | 0.36877800  | N           | -0.40731800 | 1.51005800  | 0.01763800  |
| H        | -4.66749900 | 0.43557800  | 1.62746600  | H           | -2.52917200 | 4.40512800  | 1.37195100  |
| C        | -5.18010500 | 0.83297200  | -1.78802400 | H           | -3.01261800 | 2.10106000  | 2.01429000  |
| H        | -3.54787900 | 1.27792800  | -3.15310000 | H           | 0.70691100  | 2.91413500  | -1.01038000 |
| H        | -3.81628700 | 2.50250700  | -1.91560200 | C           | -1.96672200 | -0.20984600 | 1.13677900  |
| H        | -6.46464200 | 0.48719800  | -0.06941300 | C           | -2.14200800 | -0.31427000 | 2.67236900  |
| H        | -5.59554500 | 2.01857800  | -0.03134600 | H           | -2.86917600 | 0.40744300  | 3.04590200  |
| H        | -5.95057300 | 1.33263300  | -2.38733400 | H           | -2.48970600 | -1.30049700 | 2.97457100  |
| H        | -5.19361600 | -0.22827500 | -2.07371300 | H           | -1.18404400 | -0.12767800 | 3.16678300  |
| C        | -1.69498000 | -1.07871400 | 1.05826100  | C           | -3.37629200 | -0.22595700 | 0.37498300  |
| C        | -2.43651600 | -2.06461300 | 1.71389900  | C           | -3.19801200 | -0.25847100 | -1.15253900 |
| N        | -0.85549400 | -1.50955100 | 0.11474500  | C           | -4.41510500 | -1.27668200 | 0.79851600  |
| C        | -2.25741900 | -3.41464000 | 1.36144200  | H           | -3.83430500 | 0.73588900  | 0.62449400  |
| H        | -3.16278800 | -1.81422900 | 2.47183600  | C           | -4.53143700 | 0.00537200  | -1.86507200 |
| C        | -0.63010000 | -2.80210900 | -0.26154600 | H           | -2.81307600 | -1.24179300 | -1.45222700 |
| C        | -1.36101000 | -3.81649900 | 0.38152500  | H           | -2.45467800 | 0.48012000  | -1.47209100 |
| H        | -2.84429700 | -4.16619200 | 1.88157400  | C           | -5.76008000 | -0.98002900 | 0.11586800  |

|          |             |             |             |    |             |             |             |
|----------|-------------|-------------|-------------|----|-------------|-------------|-------------|
| H        | -4.09638400 | -2.27873700 | 0.49813400  | N  | -0.39772400 | 1.60888200  | -0.11415700 |
| H        | -4.54051800 | -1.28444300 | 1.88617800  | H  | -2.63192200 | 4.50525700  | 1.04416800  |
| C        | -5.61776000 | -0.97669100 | -1.41091000 | H  | -3.07130800 | 2.22405100  | 1.79520700  |
| H        | -4.39240700 | -0.05415200 | -2.95099600 | H  | 0.71726400  | 2.99216800  | -1.16304400 |
| H        | -4.85513400 | 1.03180500  | -1.64323600 | C  | -1.88325100 | -0.10444400 | 1.08237400  |
| H        | -6.50190300 | -1.72497600 | 0.42709400  | C  | -1.94211300 | -0.14276300 | 2.62959500  |
| H        | -6.13320900 | -0.00228000 | 0.45100100  | H  | -2.66149300 | 0.58021900  | 3.01749100  |
| H        | -6.57593500 | -0.72965700 | -1.88347800 | H  | -2.23466700 | -1.12270500 | 3.00505600  |
| H        | -5.35081100 | -1.98862900 | -1.74661900 | H  | -0.95655900 | 0.09625600  | 3.04033800  |
| C        | -1.19252400 | -1.44988700 | 0.64628500  | C  | -3.33740000 | -0.23212400 | 0.42631500  |
| C        | -1.69129100 | -2.70820900 | 0.96953400  | C  | -3.26532100 | -0.30945200 | -1.10937500 |
| N        | -0.14812300 | -1.37143500 | -0.21439100 | C  | -4.28839600 | -1.31728700 | 0.95598300  |
| C        | -1.23155400 | -3.84130800 | 0.28395800  | H  | -3.82972700 | 0.71170000  | 0.67480300  |
| H        | -2.47160300 | -2.81959000 | 1.70446800  | C  | -4.65698900 | -0.13171200 | -1.73057900 |
| C        | 0.31035800  | -2.45586000 | -0.93892200 | H  | -2.85641800 | -1.28406800 | -1.40698500 |
| C        | -0.28083000 | -3.72141000 | -0.70398100 | H  | -2.58209900 | 0.45195400  | -1.50202500 |
| H        | -1.64968700 | -4.81458000 | 0.52372300  | C  | -5.69138800 | -1.10663800 | 0.36396800  |
| H        | 0.07726200  | -4.56809900 | -1.27725300 | H  | -3.94537900 | -2.31321800 | 0.66171300  |
| O        | 1.28905400  | -2.29321800 | -1.75858000 | H  | -4.33662100 | -1.29564800 | 2.04956500  |
| C        | -0.59218600 | 5.26326200  | -0.41745400 | C  | -5.65807700 | -1.14791700 | -1.16868200 |
| H        | 0.27460500  | 5.27336900  | -1.08294800 | H  | -4.59351300 | -0.22111100 | -2.82151400 |
| H        | -1.44615000 | 5.68439600  | -0.95945800 | H  | -5.01364400 | 0.88533200  | -1.51642500 |
| H        | -0.38578900 | 5.92617700  | 0.42959200  | H  | -6.37264200 | -1.87399000 | 0.75006700  |
| Pd       | 1.12501600  | 0.19584200  | -0.33432200 | H  | -6.08599600 | -0.13618500 | 0.69533400  |
| C        | 5.37445000  | -1.52623700 | 0.99095500  | H  | -6.65848400 | -0.96294600 | -1.57776100 |
| C        | 5.22946400  | -0.31442300 | 0.31932500  | H  | -5.36526900 | -2.15671400 | -1.49194400 |
| C        | 4.00368200  | -0.02497200 | -0.27468000 | C  | -1.08988000 | -1.33124100 | 0.58505600  |
| C        | 2.96687600  | -0.97902100 | -0.22851500 | C  | -1.51593700 | -2.60049300 | 0.97444500  |
| C        | 3.23006800  | -2.16029900 | 0.49041100  | N  | -0.10263700 | -1.24359600 | -0.34765400 |
| N        | 4.39172600  | -2.43596300 | 1.09458600  | C  | -1.08239500 | -3.73269600 | 0.27878100  |
| H        | 6.31265600  | -1.77139300 | 1.48423400  | H  | -2.22024100 | -2.71889600 | 1.78216100  |
| H        | 6.03453400  | 0.41177500  | 0.28826600  | C  | 0.26440300  | -2.32190700 | -1.06748400 |
| H        | 2.46800600  | -2.93316800 | 0.55499900  | C  | -0.23485900 | -3.59911500 | -0.80648500 |
| C        | 3.72767400  | 1.35639000  | -0.80346000 | H  | -1.44112800 | -4.71382600 | 0.57228200  |
| O        | 2.46697500  | 1.70277100  | -0.73035600 | H  | 0.08964300  | -4.43812000 | -1.40925600 |
| O        | 4.62326100  | 2.09390400  | -1.20345300 | O  | 1.16212200  | -2.16679200 | -2.04810600 |
| H        | 2.11777000  | -1.34839600 | -1.14336400 | C  | -0.66153000 | 5.33523100  | -0.71661800 |
|          |             |             |             | H  | 0.25134000  | 5.34927400  | -1.31765100 |
| <b>5</b> |             |             |             | H  | -1.48733900 | 5.69297800  | -1.34198100 |
| C        | -1.44595400 | 1.32813600  | 0.67852300  | H  | -0.54480300 | 6.04885300  | 0.10591100  |
| C        | -2.24497400 | 2.39960800  | 1.11987500  | Pd | 1.26644500  | 0.30464900  | -0.18843000 |
| C        | -2.00028100 | 3.69432200  | 0.69265400  | C  | 5.41859500  | -1.89476800 | 0.55794900  |
| C        | -0.94802400 | 3.95644100  | -0.19327400 | C  | 5.34447600  | -0.52125700 | 0.33760400  |
| C        | -0.16312800 | 2.86771500  | -0.54408000 | C  | 4.08817900  | 0.03517100  | 0.10631300  |



|          |             |             |             |           |             |             |             |
|----------|-------------|-------------|-------------|-----------|-------------|-------------|-------------|
| C        | 2.94417800  | -0.77803600 | 0.07223000  | C         | -2.64385100 | -2.45763100 | 0.56256000  |
| C        | 3.13697700  | -2.13952900 | 0.33856500  | N         | -1.03583300 | -1.28522700 | -0.71073300 |
| N        | 4.33986300  | -2.69354500 | 0.57529900  | C         | -2.45095900 | -3.58520100 | -0.26868200 |
| H        | 6.37789500  | -2.37453300 | 0.74341700  | H         | -3.36150000 | -2.50530800 | 1.36639400  |
| H        | 6.22818700  | 0.10905600  | 0.35836300  | C         | -0.82378800 | -2.34895300 | -1.59101800 |
| H        | 2.29801600  | -2.82968500 | 0.37825300  | C         | -1.61611100 | -3.52781700 | -1.35395500 |
| C        | 3.87295300  | 1.51167800  | -0.05421200 | H         | -2.99700800 | -4.49907700 | -0.04933300 |
| O        | 2.60516400  | 1.84973900  | -0.12627900 | H         | -1.46248800 | -4.37687600 | -2.01136200 |
| O        | 4.79689200  | 2.32120100  | -0.09008600 | O         | 0.06079800  | -2.25110800 | -2.47052500 |
| H        | 1.52131000  | -1.25624400 | -1.99304500 | C         | 0.09613200  | 5.07352400  | -0.65846700 |
| <b>2</b> |             |             |             | H         | 1.00037700  | 4.88586700  | -1.24333900 |
| C        | -1.64639000 | 1.32785000  | 0.61215500  | H         | -0.61268800 | 5.61975100  | -1.29093700 |
| C        | -2.12541200 | 2.54600000  | 1.12697300  | H         | 0.35432200  | 5.72556900  | 0.18208100  |
| C        | -1.56259900 | 3.75540300  | 0.75494600  | Pd        | 0.63805000  | -0.22899600 | -0.35557200 |
| C        | -0.51003200 | 3.78967100  | -0.16900800 | C         | 2.59092400  | 1.55662900  | 1.08785300  |
| C        | -0.02785800 | 2.56091800  | -0.59042300 | O         | 3.54332400  | 2.34710100  | 1.15134900  |
| N        | -0.56021300 | 1.38727900  | -0.17926500 | O         | 2.28852000  | 0.97235900  | -0.04164900 |
| H        | -1.94991400 | 4.67990500  | 1.17270200  | C         | 1.72394500  | 1.27011300  | 2.29664300  |
| H        | -2.95288100 | 2.54501200  | 1.82342900  | H         | 0.84899600  | 1.92954600  | 2.26504500  |
| H        | 0.83225000  | 2.48902300  | -1.24222400 | H         | 1.36547900  | 0.23861100  | 2.29896700  |
| C        | -2.42777000 | 0.03366800  | 0.94042000  | H         | 2.27887300  | 1.47661400  | 3.21354500  |
| C        | -2.41231000 | -0.13245200 | 2.47786000  | C         | 1.31719700  | -2.79532800 | 0.82277100  |
| H        | -2.89737600 | 0.71122600  | 2.97384000  | C         | 2.19250100  | -2.28030800 | -0.14870400 |
| H        | -2.93106900 | -1.03929700 | 2.78824100  | C         | 3.41278200  | -1.71987800 | 0.27866900  |
| H        | -1.37955800 | -0.19424800 | 2.83386700  | C         | 3.67874800  | -1.70500800 | 1.64385200  |
| C        | -3.89494500 | 0.34682300  | 0.39373900  | C         | 2.73247500  | -2.22851200 | 2.52835700  |
| C        | -3.92555600 | 0.42878700  | -1.14210800 | N         | 1.56474200  | -2.76393500 | 2.14422600  |
| C        | -5.05135700 | -0.53636700 | 0.88927000  | H         | 0.38996600  | -3.27491300 | 0.52548900  |
| H        | -4.12934700 | 1.34573000  | 0.77217100  | H         | 4.60479800  | -1.27192500 | 2.00225900  |
| C        | -5.26556700 | 0.99098100  | -1.63482700 | H         | 2.92242500  | -2.21131400 | 3.59976900  |
| H        | -3.77211900 | -0.57388100 | -1.56153500 | C         | 4.37313800  | -1.05874600 | -0.70890500 |
| H        | -3.10336200 | 1.05258800  | -1.51106900 | O         | 5.42770000  | -0.57225700 | -0.21416100 |
| C        | -6.39249200 | 0.05722700  | 0.43039900  | O         | 3.98621500  | -0.97318000 | -1.90462100 |
| H        | -4.96804600 | -1.54573700 | 0.47718500  | K         | 4.53094700  | 1.67899900  | -1.36813900 |
| H        | -5.03519000 | -0.62512800 | 1.98047400  | H         | 1.97384200  | -2.38299800 | -1.20744300 |
| C        | -6.45000500 | 0.17931400  | -1.09708100 | <b>6*</b> |             |             |             |
| H        | -5.28247800 | 1.01052900  | -2.73094900 | C         | 1.59428000  | 1.41139800  | -0.68227900 |
| H        | -5.35849900 | 2.03310800  | -1.29833000 | C         | 2.47086400  | 2.48396400  | -0.93445400 |
| H        | -7.21553500 | -0.57016100 | 0.79261800  | C         | 2.17356900  | 3.76271000  | -0.49341700 |
| H        | -6.52879700 | 1.04962800  | 0.88236500  | C         | 0.98933900  | 4.00924100  | 0.21324100  |
| H        | -7.39708300 | 0.63576200  | -1.40885200 | C         | 0.14573600  | 2.92172900  | 0.38414300  |
| H        | -6.42401100 | -0.82783400 | -1.53629200 | N         | 0.43929700  | 1.68200300  | -0.05912700 |
| C        | -1.97150200 | -1.28188700 | 0.27495300  | H         | 2.86488700  | 4.57559800  | -0.69649100 |

|    |             |             |             |    |             |             |             |
|----|-------------|-------------|-------------|----|-------------|-------------|-------------|
| H  | 3.39117200  | 2.32298400  | -1.47926200 | N  | -4.16298600 | -2.84149300 | -0.45796300 |
| H  | -0.81656100 | 3.02986500  | 0.87022000  | H  | -6.20203700 | -2.59626000 | -0.70341300 |
| C  | 2.00834800  | -0.00548600 | -1.14447200 | H  | -6.10361600 | -0.08044900 | -0.73131700 |
| C  | 2.10073600  | 0.06768800  | -2.68889200 | H  | -2.12133000 | -2.90964200 | -0.21570000 |
| H  | 2.81256100  | 0.83636300  | -2.99556200 | C  | -3.77435000 | 1.41017200  | -0.51668800 |
| H  | 2.42638000  | -0.87041400 | -3.13587700 | O  | -2.50686300 | 1.77660700  | -0.48461900 |
| H  | 1.12126400  | 0.32150900  | -3.10548200 | O  | -4.69510600 | 2.20870800  | -0.64262600 |
| C  | 3.44172000  | -0.23928900 | -0.47951400 | H  | -1.16670400 | -1.36965600 | 2.36299100  |
| C  | 3.35368100  | -0.34422600 | 1.05337100  | O  | -1.37610500 | 0.77734900  | 2.05994700  |
| C  | 4.30766400  | -1.38375700 | -1.02757000 | O  | -2.01212500 | -0.10317100 | 2.75465000  |
| H  | 4.00480100  | 0.66949900  | -0.70630800 |    |             |             |             |
| C  | 4.74989100  | -0.29133900 | 1.68650300  | 6' |             |             |             |
| H  | 2.86926800  | -1.29004700 | 1.32788100  | C  | 1.61082800  | 1.25929600  | -0.90492000 |
| H  | 2.72786800  | 0.45888400  | 1.45888500  | C  | 2.39393800  | 2.33136300  | -1.37273800 |
| C  | 5.71690700  | -1.31081600 | -0.41737400 | C  | 2.06327900  | 3.64141500  | -1.06820500 |
| H  | 3.87249500  | -2.35375800 | -0.76890000 | C  | 0.93800900  | 3.91850800  | -0.28233300 |
| H  | 4.37425500  | -1.33571700 | -2.11924900 | C  | 0.17782100  | 2.82292200  | 0.09962100  |
| C  | 5.66565500  | -1.37919900 | 1.11358400  | N  | 0.49731200  | 1.54742100  | -0.21079800 |
| H  | 4.67000200  | -0.39354300 | 2.77522700  | H  | 2.68452500  | 4.45286400  | -1.43669300 |
| H  | 5.19291800  | 0.69549800  | 1.49293400  | H  | 3.27764500  | 2.14361400  | -1.96746400 |
| H  | 6.33156900  | -2.12730400 | -0.81425300 | H  | -0.75003500 | 2.95183800  | 0.64330700  |
| H  | 6.19933100  | -0.37276500 | -0.72496600 | C  | 2.14701400  | -0.17483600 | -1.14797500 |
| H  | 6.67427200  | -1.28928500 | 1.53429800  | C  | 2.37272200  | -0.32551000 | -2.67220400 |
| H  | 5.28329900  | -2.36480200 | 1.41411800  | H  | 3.08291300  | 0.41441100  | -3.04329300 |
| C  | 1.16345300  | -1.23092900 | -0.72542600 | H  | 2.76582500  | -1.30660900 | -2.93564800 |
| C  | 1.47963000  | -2.46632800 | -1.27575000 | H  | 1.42397500  | -0.18725100 | -3.19943700 |
| N  | 0.27948900  | -1.18212700 | 0.32310400  | C  | 3.52874900  | -0.17349300 | -0.33593200 |
| C  | 1.05712800  | -3.64417800 | -0.64263600 | C  | 3.29390100  | -0.14140900 | 1.18432800  |
| H  | 2.11036800  | -2.53882200 | -2.14771300 | C  | 4.57684600  | -1.24509600 | -0.67479400 |
| C  | -0.06290200 | -2.30916000 | 0.98680400  | H  | 4.00140800  | 0.77452800  | -0.60687400 |
| C  | 0.34842200  | -3.57635300 | 0.53662600  | C  | 4.60053600  | 0.15052100  | 1.93395100  |
| H  | 1.32988600  | -4.60687700 | -1.06285500 | H  | 2.89702500  | -1.11120100 | 1.51201300  |
| H  | 0.04644400  | -4.45466000 | 1.09374600  | H  | 2.54033000  | 0.61049800  | 1.44329000  |
| O  | -0.82305800 | -2.27208200 | 2.06751300  | C  | 5.89730200  | -0.92394000 | 0.04456400  |
| C  | 0.63383500  | 5.37100900  | 0.73806600  | H  | 4.24387900  | -2.23260800 | -0.34203500 |
| H  | -0.35892600 | 5.37232100  | 1.19513000  | H  | 4.74280700  | -1.30107300 | -1.75561200 |
| H  | 1.35829500  | 5.69785500  | 1.49237900  | C  | 5.69844800  | -0.85332800 | 1.56334300  |
| H  | 0.64503600  | 6.11409400  | -0.06643300 | H  | 4.42121300  | 0.13845000  | 3.01554200  |
| Pd | -1.17724200 | 0.30709100  | -0.03134100 | H  | 4.93636900  | 1.16553100  | 1.68024100  |
| C  | -5.25517600 | -2.07332900 | -0.58517000 | H  | 6.64630400  | -1.68439500 | -0.20582800 |
| C  | -5.21040500 | -0.68114600 | -0.59159300 | H  | 6.28744700  | 0.03690400  | -0.31868300 |
| C  | -3.96768000 | -0.07218800 | -0.43145500 | H  | 6.63960100  | -0.58875800 | 2.05996500  |
| C  | -2.82095300 | -0.85264200 | -0.24610400 | H  | 5.41453400  | -1.84881400 | 1.93273200  |
| C  | -2.97083000 | -2.23998500 | -0.29344100 | C  | 1.36498600  | -1.40224800 | -0.63451200 |

|                           |             |             |             |    |             |             |             |
|---------------------------|-------------|-------------|-------------|----|-------------|-------------|-------------|
| C                         | 1.88036400  | -2.67125500 | -0.89572400 | H  | -1.41876600 | 0.72107100  | 2.94855100  |
| N                         | 0.30229400  | -1.30217200 | 0.21100100  | C  | -3.55972800 | -0.13752100 | 0.25895300  |
| C                         | 1.44478400  | -3.77538000 | -0.15793000 | C  | -3.37639900 | -0.48495700 | -1.22858400 |
| H                         | 2.65712300  | -2.80843700 | -1.63050000 | C  | -4.49554800 | -1.16532600 | 0.91335600  |
| C                         | -0.06947500 | -2.34821600 | 0.97547900  | H  | -4.09677500 | 0.81499100  | 0.30688700  |
| C                         | 0.50600900  | -3.61301300 | 0.84454400  | C  | -4.72531900 | -0.49693600 | -1.95893200 |
| H                         | 1.87237900  | -4.75372100 | -0.35153100 | H  | -2.91194700 | -1.47479800 | -1.31581500 |
| H                         | 0.17204700  | -4.42460700 | 1.47870600  | H  | -2.69518200 | 0.22348700  | -1.71211500 |
| O                         | -1.04548200 | -2.17481400 | 1.87536200  | C  | -5.85810600 | -1.16487000 | 0.20158000  |
| C                         | 0.55365900  | 5.31716300  | 0.10879200  | H  | -4.06591000 | -2.16954200 | 0.84082100  |
| H                         | -0.40438600 | 5.33203900  | 0.63485900  | H  | -4.63550900 | -0.94779600 | 1.97680100  |
| H                         | 1.31070100  | 5.75903000  | 0.76662100  | C  | -5.71020400 | -1.46564500 | -1.29433500 |
| H                         | 0.47387800  | 5.96179100  | -0.77294100 | H  | -4.57719200 | -0.76461000 | -3.01179300 |
| Pd                        | -1.11063600 | 0.17605700  | -0.13274500 | H  | -5.14820900 | 0.51736200  | -1.94635300 |
| C                         | -5.13663000 | -2.23606500 | -0.91646600 | H  | -6.51878800 | -1.90118700 | 0.67431100  |
| C                         | -5.12489200 | -0.84916600 | -0.78503000 | H  | -6.33535400 | -0.18347000 | 0.33064700  |
| C                         | -3.90224300 | -0.22774000 | -0.54034600 | H  | -6.68659700 | -1.41855300 | -1.79129300 |
| C                         | -2.73142600 | -0.98981100 | -0.40212700 | H  | -5.34094700 | -2.49339600 | -1.41825100 |
| C                         | -2.85945400 | -2.37218600 | -0.58777000 | C  | -1.36210000 | -1.16578700 | 0.87491600  |
| N                         | -4.02829400 | -2.98939100 | -0.83812100 | C  | -1.73943000 | -2.22690200 | 1.68374800  |
| H                         | -6.06801600 | -2.76560600 | -1.10863600 | N  | -0.47822400 | -1.39874300 | -0.14941500 |
| H                         | -6.03019200 | -0.25835400 | -0.88511700 | C  | -1.34942500 | -3.53614000 | 1.35818800  |
| H                         | -1.99257300 | -3.02713200 | -0.54672400 | H  | -2.39732300 | -2.07505200 | 2.52464700  |
| C                         | -3.74756200 | 1.26398800  | -0.48065400 | C  | -0.19962200 | -2.66681200 | -0.55427200 |
| O                         | -2.49602300 | 1.65496000  | -0.39809200 | C  | -0.64150600 | -3.77303900 | 0.20448900  |
| O                         | -4.70111000 | 2.03689900  | -0.53759600 | H  | -1.65546100 | -4.36082000 | 1.99421600  |
| H                         | -1.45625800 | -1.30049100 | 1.71086800  | H  | -0.36921900 | -4.76783800 | -0.12664500 |
| O                         | -2.23064500 | 1.26289500  | 3.37290200  | O  | 0.50133400  | -2.91564800 | -1.63082200 |
| O                         | -3.39742400 | 1.30418700  | 3.04127500  | C  | -0.56602100 | 4.99226700  | -1.89584200 |
|                           |             |             |             | H  | 0.38523500  | 4.83409600  | -2.41028600 |
| <b>6<sup>s</sup>_AcOH</b> |             |             |             | H  | -1.32577300 | 5.23650600  | -2.64653800 |
| C                         | -1.65647700 | 1.43756800  | 0.29682700  | H  | -0.46381100 | 5.86425700  | -1.24099800 |
| C                         | -2.45672900 | 2.59286500  | 0.37763400  | Pd | 1.02846200  | 0.06745200  | -0.29731900 |
| C                         | -2.11687300 | 3.74582500  | -0.30962000 | C  | 5.06780800  | -2.38371000 | 0.18795700  |
| C                         | -0.96709200 | 3.77771200  | -1.10856200 | C  | 5.07054700  | -1.04738300 | -0.20098900 |
| C                         | -0.20272600 | 2.62087400  | -1.11957600 | C  | 3.84053100  | -0.39664700 | -0.29506200 |
| N                         | -0.53322400 | 1.50744700  | -0.43140000 | C  | 2.65967700  | -1.09747800 | -0.03596300 |
| H                         | -2.75118800 | 4.62427000  | -0.23231300 | C  | 2.76770900  | -2.41800200 | 0.39986400  |
| H                         | -3.35982800 | 2.59014500  | 0.97193200  | N  | 3.94837300  | -3.05172100 | 0.50531800  |
| H                         | 0.72445000  | 2.56864500  | -1.67732900 | H  | 6.00070700  | -2.93683300 | 0.27168400  |
| C                         | -2.16273900 | 0.15224100  | 0.98801000  | H  | 5.99244100  | -0.51294800 | -0.40665100 |
| C                         | -2.38005600 | 0.50770600  | 2.47921900  | H  | 1.89865700  | -2.99678100 | 0.69154900  |
| H                         | -3.01988500 | 1.38460700  | 2.58252700  | C  | 3.73451700  | 1.06523000  | -0.57283300 |
| H                         | -2.85922800 | -0.29576700 | 3.03502000  | O  | 2.48548900  | 1.53045700  | -0.46180100 |

|                           |             |             |             |                          |             |             |             |
|---------------------------|-------------|-------------|-------------|--------------------------|-------------|-------------|-------------|
| O                         | 4.68085000  | 1.79175500  | -0.82473700 | H                        | -5.70868400 | -2.41940600 | -1.21134300 |
| H                         | 0.90997200  | -2.11342700 | -2.20031000 | C                        | -1.46614300 | -1.35513500 | 0.80693800  |
| O                         | 0.94827400  | -0.06560800 | -2.36496400 | C                        | -2.00131900 | -2.44865700 | 1.48562400  |
| O                         | 1.60407400  | -1.10252100 | -2.86113300 | N                        | -0.45858500 | -1.58438600 | -0.08125100 |
| C                         | 1.29282500  | 1.58905600  | 2.54873800  | C                        | -1.65641700 | -3.74962300 | 1.10689700  |
| O                         | 1.00479100  | 0.48256700  | 2.07483200  | H                        | -2.72562300 | -2.30441600 | 2.27142100  |
| O                         | 1.90478100  | 2.54121500  | 1.87199200  | C                        | -0.17435500 | -2.83275800 | -0.49768800 |
| H                         | 2.14070000  | 2.22066400  | 0.94902700  | C                        | -0.78800900 | -3.96015100 | 0.05047300  |
| C                         | 0.94628100  | 1.97332000  | 3.95591000  | H                        | -2.10183700 | -4.59465400 | 1.62157800  |
| H                         | 1.78836200  | 2.48355800  | 4.42978900  | H                        | -0.52995900 | -4.94636500 | -0.31443800 |
| H                         | 0.10322400  | 2.67292900  | 3.92814000  | O                        | 0.75477600  | -2.99444800 | -1.44838100 |
| H                         | 0.66190400  | 1.09174200  | 4.52945600  | C                        | -0.44952900 | 4.65987600  | -2.17617800 |
|                           |             |             |             | H                        | 0.38205600  | 4.39075900  | -2.83256700 |
|                           |             |             |             | H                        | -1.27671800 | 5.02073100  | -2.79661700 |
| <b>6<sup>t</sup>_AcOH</b> |             |             |             | H                        | -0.12817000 | 5.49520300  | -1.54374900 |
| C                         | -1.61030500 | 1.24714600  | 0.19303600  | H                        | -0.12817000 | 5.49520300  | -1.54374900 |
| C                         | -2.32468900 | 2.45426600  | 0.29742800  | Pd                       | 1.02831900  | -0.15578300 | -0.21314300 |
| C                         | -1.96278900 | 3.56273100  | -0.45155500 | C                        | 4.96063300  | -2.44268000 | 1.19544600  |
| C                         | -0.87792700 | 3.49293700  | -1.33332700 | C                        | 5.00497200  | -1.13608900 | 0.71670900  |
| C                         | -0.18228000 | 2.29299000  | -1.34714600 | C                        | 3.80647600  | -0.54706300 | 0.31647900  |
| N                         | -0.52608700 | 1.22276700  | -0.59976700 | C                        | 2.60192100  | -1.26705400 | 0.37335800  |
| H                         | -2.52886700 | 4.48485700  | -0.35502600 | C                        | 2.67542400  | -2.55824900 | 0.91248200  |
| H                         | -3.17583500 | 2.52850100  | 0.96028500  | N                        | 3.81979900  | -3.14021900 | 1.31214400  |
| H                         | 0.71299400  | 2.17731300  | -1.94678500 | H                        | 5.87067100  | -2.94616300 | 1.51579200  |
| C                         | -2.17539400 | 0.00993600  | 0.93358100  | H                        | 5.93395500  | -0.57668100 | 0.66928400  |
| C                         | -2.30065300 | 0.38782600  | 2.42976100  | H                        | 1.78266700  | -3.16211100 | 1.04910500  |
| H                         | -2.99310000 | 1.22093800  | 2.56462000  | C                        | 3.73040700  | 0.88783700  | -0.09968400 |
| H                         | -2.67537900 | -0.44048700 | 3.03043700  | O                        | 2.49385400  | 1.29088100  | -0.36133500 |
| H                         | -1.32108000 | 0.68345200  | 2.81408200  | O                        | 4.70110700  | 1.63182000  | -0.15594600 |
| C                         | -3.61073900 | -0.18789600 | 0.24962200  | H                        | 1.18791200  | -2.12802000 | -1.59336000 |
| C                         | -3.48870500 | -0.67029000 | -1.20589500 | O                        | 2.07069600  | -0.55406200 | -3.79363900 |
| C                         | -4.65894100 | -1.03413600 | 0.98888100  | O                        | 3.26291800  | -0.37574200 | -3.65207800 |
| H                         | -4.03634700 | 0.81897300  | 0.21934900  | C                        | 0.88998500  | 2.73702300  | 2.17075100  |
| C                         | -4.83920600 | -0.57801200 | -1.92882000 | O                        | 0.93341700  | 1.55311200  | 2.47623800  |
| H                         | -3.14124400 | -1.71171500 | -1.21508600 | O                        | 1.54266900  | 3.25624200  | 1.13068900  |
| H                         | -2.73718300 | -0.08325900 | -1.74527400 | H                        | 1.96899700  | 2.52192600  | 0.59878600  |
| C                         | -6.01992300 | -0.89905600 | 0.28727300  | C                        | 0.08429300  | 3.76944200  | 2.91506100  |
| H                         | -4.37963200 | -2.09160100 | 0.98102700  | H                        | 0.69729800  | 4.64822600  | 3.13430400  |
| H                         | -4.74399900 | -0.72386200 | 2.03534200  | H                        | -0.74760800 | 4.09668700  | 2.28305000  |
| C                         | -5.93463500 | -1.34431500 | -1.17779900 | H                        | -0.30802000 | 3.34579900  | 3.83963100  |
| H                         | -4.74161700 | -0.95680300 | -2.95308900 |                          |             |             |             |
| H                         | -5.12700500 | 0.47960300  | -2.00881800 | <b>6<sup>t</sup>_Pyr</b> |             |             |             |
| H                         | -6.77003900 | -1.49354600 | 0.82205600  | C                        | -1.70169900 | -1.16703300 | 1.49665500  |
| H                         | -6.35303600 | 0.14701900  | 0.33333400  | C                        | -2.22800100 | -1.80796500 | 2.63545500  |
| H                         | -6.90252900 | -1.20953000 | -1.67527800 | C                        | -2.51006800 | -1.10315900 | 3.79181500  |

|    |             |             |             |                          |             |             |             |
|----|-------------|-------------|-------------|--------------------------|-------------|-------------|-------------|
| C  | -2.26536000 | 0.27365400  | 3.84247300  | C                        | 1.74090600  | 4.94371600  | -0.84710400 |
| C  | -1.71829900 | 0.83899900  | 2.69985600  | C                        | 1.04719700  | 3.91925300  | -0.20228400 |
| N  | -1.43751900 | 0.14904500  | 1.56977300  | C                        | 0.44387300  | 2.92137200  | -0.97204900 |
| H  | -2.92024700 | -1.61973300 | 4.65512100  | C                        | 0.57699600  | 2.97790600  | -2.35835900 |
| H  | -2.42185900 | -2.87170000 | 2.61444200  | N                        | 1.24947100  | 3.96084900  | -2.98638900 |
| H  | -1.46279900 | 1.89096800  | 2.68019100  | H                        | 2.34572100  | 5.70189600  | -2.77557900 |
| C  | -1.42985700 | -2.04893700 | 0.25711400  | H                        | 2.21423200  | 5.72571600  | -0.26207000 |
| C  | -0.31197800 | -3.03294200 | 0.68884700  | H                        | 0.13902800  | 2.22260900  | -3.00020200 |
| H  | -0.57551100 | -3.51956900 | 1.62925900  | C                        | 0.95989300  | 3.85218000  | 1.30207100  |
| H  | -0.14888600 | -3.82324200 | -0.04363100 | O                        | 0.33856800  | 2.80758800  | 1.76508600  |
| H  | 0.63075000  | -2.49861200 | 0.83487500  | O                        | 1.46029300  | 4.73050000  | 2.00866500  |
| C  | -2.77262500 | -2.85536600 | -0.03972200 | H                        | -2.53018900 | 1.87511300  | -2.01510100 |
| C  | -4.00073200 | -1.94554800 | -0.21920300 | O                        | -2.19759000 | 2.75369400  | 0.24860200  |
| C  | -2.69827700 | -3.84587300 | -1.21465900 | O                        | -3.06001900 | 2.73139400  | -0.72433600 |
| H  | -2.94588700 | -3.46708700 | 0.85212000  | C                        | 1.93642300  | 0.02720600  | -1.02085700 |
| C  | -5.29203300 | -2.77004100 | -0.30445000 | C                        | 3.09295400  | -0.74017300 | -1.00304300 |
| H  | -3.88402300 | -1.35458700 | -1.13486500 | C                        | 3.64233700  | -1.12372800 | 0.22219200  |
| H  | -4.07528000 | -1.23042000 | 0.60644300  | C                        | 3.00143700  | -0.70902500 | 1.39275900  |
| C  | -3.97842900 | -4.69137200 | -1.28739500 | C                        | 1.84805100  | 0.05778700  | 1.30332000  |
| H  | -2.58336200 | -3.30051500 | -2.15774800 | N                        | 1.32602500  | 0.40712600  | 0.11382000  |
| H  | -1.82802700 | -4.50263100 | -1.11930100 | H                        | 1.47482300  | 0.34500300  | -1.94653000 |
| C  | -5.22290400 | -3.80802700 | -1.43010900 | H                        | 3.56807300  | -1.04309000 | -1.92795100 |
| H  | -6.14979200 | -2.10301500 | -0.45193300 | H                        | 3.40592200  | -0.98761500 | 2.35806300  |
| H  | -5.45335600 | -3.28437100 | 0.65342700  | H                        | 1.31995900  | 0.40781700  | 2.18149900  |
| H  | -3.91022800 | -5.39252700 | -2.12773300 | C                        | 4.90856400  | -1.97134200 | 0.28276600  |
| H  | -4.06547200 | -5.29865800 | -0.37559100 | O                        | 5.33100300  | -2.27287100 | 1.43415500  |
| H  | -6.13045100 | -4.42364500 | -1.44026100 | O                        | 5.42420200  | -2.29702700 | -0.82314600 |
| H  | -5.18235300 | -3.28658000 | -2.39683100 | K                        | 7.38756200  | -3.53012400 | 0.40253700  |
| C  | -1.05719000 | -1.35761400 | -1.05693200 |                          |             |             |             |
| C  | -0.29930000 | -2.02885800 | -2.01645000 | <b>6<sup>s</sup>_Pyr</b> |             |             |             |
| N  | -1.63051400 | -0.16423500 | -1.34777000 | C                        | -1.28559300 | -1.36562800 | 1.38015000  |
| C  | -0.20514400 | -1.50223800 | -3.30996100 | C                        | -1.38331900 | -2.21506400 | 2.49805100  |
| H  | 0.18811800  | -2.96524200 | -1.79154400 | C                        | -1.66639300 | -1.70520600 | 3.75467600  |
| C  | -1.55665500 | 0.32113800  | -2.59748300 | C                        | -1.88085900 | -0.33161400 | 3.92779400  |
| C  | -0.85848000 | -0.32562100 | -3.62943400 | C                        | -1.72829200 | 0.45569200  | 2.79554500  |
| H  | 0.37352800  | -2.02679000 | -4.06410300 | N                        | -1.42104800 | -0.04879000 | 1.58408500  |
| H  | -0.83393400 | 0.10817900  | -4.62205700 | H                        | -1.73334300 | -2.37782300 | 4.60517700  |
| O  | -2.16500600 | 1.47910400  | -2.86104000 | H                        | -1.24693000 | -3.28212200 | 2.38518400  |
| C  | -2.56290100 | 1.10129000  | 5.06088800  | H                        | -1.83195200 | 1.53313300  | 2.83406000  |
| H  | -2.25711000 | 2.14100500  | 4.91780300  | C                        | -1.11846700 | -2.00779300 | -0.01368600 |
| H  | -3.63482900 | 1.08879000  | 5.28815300  | C                        | 0.11648200  | -2.93982900 | 0.06710100  |
| H  | -2.04083700 | 0.70660600  | 5.93935700  | H                        | -0.05226500 | -3.74931500 | 0.77939600  |
| Pd | -0.49207800 | 1.52185700  | 0.12150400  | H                        | 0.34937600  | -3.40493800 | -0.88849500 |
| C  | 1.81169100  | 4.92107800  | -2.23755500 | H                        | 0.99552800  | -2.38058100 | 0.39289900  |

|    |             |             |             |              |             |             |             |
|----|-------------|-------------|-------------|--------------|-------------|-------------|-------------|
| C  | -2.46178900 | -2.86168500 | -0.18138600 | H            | -3.18490700 | 2.11211200  | -1.00687600 |
| C  | -3.70170800 | -1.96727200 | -0.34643600 | O            | -2.24875400 | 2.62394500  | 0.51421200  |
| C  | -2.47044300 | -3.95837000 | -1.25780900 | O            | -3.42408500 | 2.08236600  | -0.02427600 |
| H  | -2.57166400 | -3.39167500 | 0.77037700  | C            | 1.80924500  | 0.06966100  | -1.06199800 |
| C  | -4.99152000 | -2.79189800 | -0.24473900 | C            | 3.02945200  | -0.58869400 | -1.11526600 |
| H  | -3.66351700 | -1.47311800 | -1.32527500 | C            | 3.67667600  | -0.93220200 | 0.07379800  |
| H  | -3.70651200 | -1.17053900 | 0.40441400  | C            | 3.06375100  | -0.59348700 | 1.28265600  |
| C  | -3.74635800 | -4.80614400 | -1.13413900 | C            | 1.84105100  | 0.06376000  | 1.26581200  |
| H  | -2.44790500 | -3.51068600 | -2.25599700 | N            | 1.22964000  | 0.37813800  | 0.11055800  |
| H  | -1.58835000 | -4.60068500 | -1.16915900 | H            | 1.27538500  | 0.35531100  | -1.95889400 |
| C  | -5.00500600 | -3.93989900 | -1.26059000 | H            | 3.48119200  | -0.83517700 | -2.06818800 |
| H  | -5.86236500 | -2.14198400 | -0.39150200 | H            | 3.54147500  | -0.84553300 | 2.22139500  |
| H  | -5.07279900 | -3.20470800 | 0.77054200  | H            | 1.32929400  | 0.34865200  | 2.17657500  |
| H  | -3.74416300 | -5.58852600 | -1.90231000 | C            | 5.01587600  | -1.66214800 | 0.05291400  |
| H  | -3.75164300 | -5.31748500 | -0.16144600 | O            | 5.52808400  | -1.93261300 | 1.17485100  |
| H  | -5.90544600 | -4.55254400 | -1.13227100 | O            | 5.49321600  | -1.93194000 | -1.08444200 |
| H  | -5.04943000 | -3.52039300 | -2.27550800 | K            | 7.61219500  | -3.02206500 | 0.01316800  |
| C  | -1.03169900 | -1.10865300 | -1.27238700 |              |             |             |             |
| C  | -0.74217500 | -1.72074400 | -2.48001800 | <b>5_Pyr</b> |             |             |             |
| N  | -1.43030600 | 0.20228200  | -1.27719300 | C            | 1.98815700  | 1.20377300  | -0.53855900 |
| C  | -0.96590900 | -1.03543500 | -3.69258700 | C            | 2.63306600  | 2.21957700  | -1.27070500 |
| H  | -0.40297100 | -2.74351800 | -2.51546800 | C            | 2.51670000  | 3.54870600  | -0.89926100 |
| C  | -1.85786400 | 0.83894100  | -2.43828800 | C            | 1.77862300  | 3.90018300  | 0.24148800  |
| C  | -1.55966000 | 0.19766300  | -3.68589700 | C            | 1.14514400  | 2.85589700  | 0.90087900  |
| H  | -0.70927100 | -1.51822600 | -4.63146100 | N            | 1.22348100  | 1.56477800  | 0.50322500  |
| H  | -1.80619700 | 0.73513500  | -4.59478100 | H            | 3.01065500  | 4.31789000  | -1.48618200 |
| O  | -2.43945500 | 1.95818700  | -2.38400500 | H            | 3.23452900  | 1.97144800  | -2.13421400 |
| C  | -2.23330500 | 0.26645800  | 5.26014100  | H            | 0.50469600  | 3.04542600  | 1.75441500  |
| H  | -2.29962300 | 1.35576200  | 5.19936000  | C            | 2.29340800  | -0.26235700 | -0.92262300 |
| H  | -3.19656000 | -0.11539000 | 5.61658800  | C            | 2.07152600  | -0.38617700 | -2.45267100 |
| H  | -1.48248600 | 0.00824000  | 6.01470600  | H            | 2.82668600  | 0.17749200  | -3.00343000 |
| Pd | -0.65654400 | 1.43363800  | 0.22925000  | H            | 2.13736700  | -1.41756900 | -2.79624100 |
| C  | 1.54359300  | 5.00781300  | -1.98638500 | H            | 1.08333100  | 0.00863100  | -2.70041900 |
| C  | 1.44037100  | 4.95944300  | -0.59957200 | C            | 3.84466100  | -0.40545500 | -0.54869900 |
| C  | 0.77551900  | 3.87060400  | -0.03552500 | C            | 4.08210700  | -0.38907400 | 0.97153500  |
| C  | 0.22730700  | 2.89392600  | -0.86445100 | C            | 4.62774300  | -1.56590200 | -1.18223400 |
| C  | 0.40519300  | 3.01280700  | -2.24039700 | H            | 4.30085200  | 0.50245300  | -0.95684400 |
| N  | 1.05327200  | 4.05358100  | -2.79256600 | C            | 5.57665000  | -0.25212900 | 1.29142000  |
| H  | 2.05157200  | 5.83703000  | -2.47404200 | H            | 3.70193700  | -1.32190100 | 1.40879800  |
| H  | 1.87017600  | 5.72716300  | 0.03573400  | H            | 3.52463400  | 0.42856400  | 1.44125400  |
| H  | 0.04383500  | 2.26279500  | -2.93195900 | C            | 6.12847200  | -1.39837600 | -0.89595600 |
| C  | 0.68223600  | 3.66217800  | 1.44295700  | H            | 4.30768500  | -2.52245100 | -0.75872000 |
| O  | 0.11865300  | 2.51973600  | 1.78202600  | H            | 4.45419500  | -1.61050600 | -2.26212700 |
| O  | 1.11515500  | 4.45806900  | 2.26752300  | C            | 6.40163300  | -1.35149800 | 0.61217100  |

|    |             |             |             |             |             |             |             |
|----|-------------|-------------|-------------|-------------|-------------|-------------|-------------|
| H  | 5.72908700  | -0.27557900 | 2.37691100  | C           | -2.16733400 | 0.65732300  | -2.17290400 |
| H  | 5.92625800  | 0.73018400  | 0.94431700  | O           | -3.17054800 | 1.42098800  | -2.13422900 |
| H  | 6.68537200  | -2.22189200 | -1.35821600 | O           | -0.95474500 | 1.02205300  | -2.23205800 |
| H  | 6.48842700  | -0.47081500 | -1.36229100 | K           | -1.65609500 | 3.37902500  | -1.17206800 |
| H  | 7.47050200  | -1.19851700 | 0.80308900  |             |             |             |             |
| H  | 6.13655300  | -2.32309000 | 1.05223900  | <b>8-ts</b> |             |             |             |
| C  | 1.57834500  | -1.42181200 | -0.19423200 | O           | 1.37111900  | -1.80178200 | -2.51833900 |
| C  | 1.85540100  | -2.72716400 | -0.59865900 | H           | 0.68101500  | -1.32831000 | -1.22122100 |
| N  | 0.83610800  | -1.24654500 | 0.93537100  | O           | -0.87742800 | -0.18308300 | -0.08598300 |
| C  | 1.53308400  | -3.80749800 | 0.22722500  | O           | 0.64666200  | -1.03087000 | -0.24638700 |
| H  | 2.36145800  | -2.91537300 | -1.53172500 | H           | -0.97842900 | 0.12509000  | -1.05659600 |
| C  | 0.60917400  | -2.27298400 | 1.77755600  | C           | -2.89325800 | 3.17223500  | 1.66058000  |
| C  | 0.96242500  | -3.58686700 | 1.46794100  | C           | -2.23972800 | 4.20217000  | 2.34212100  |
| H  | 1.76811500  | -4.81731600 | -0.09262800 | C           | -1.15101300 | 3.91181000  | 3.15934100  |
| H  | 0.74611100  | -4.38350500 | 2.16860900  | C           | -0.69726700 | 2.59836500  | 3.29935900  |
| O  | 0.00130200  | -2.02237100 | 2.94415300  | C           | -1.37796600 | 1.63041300  | 2.56681900  |
| C  | 1.64764700  | 5.32284900  | 0.71011900  | N           | -2.42025300 | 1.91735300  | 1.77620000  |
| H  | 0.94529000  | 5.40171000  | 1.54406000  | H           | -0.64304000 | 4.71806400  | 3.68147800  |
| H  | 2.61605000  | 5.71384300  | 1.04168300  | H           | -2.56377900 | 5.22805000  | 2.23321600  |
| H  | 1.29766700  | 5.97010400  | -0.10135800 | H           | -1.07888900 | 0.58976200  | 2.57841500  |
| Pd | -0.44581300 | 0.37242500  | 1.04062600  | C           | -4.06968400 | 3.38011300  | 0.67869400  |
| C  | -4.81067900 | -1.49671300 | 1.49966000  | C           | -3.40504800 | 3.23364700  | -0.71679800 |
| C  | -4.60063500 | -0.12152100 | 1.46298500  | C           | -3.26341300 | 4.30507600  | -1.58283100 |
| C  | -3.28747100 | 0.33566800  | 1.36292800  | N           | -2.88657500 | 2.01067100  | -1.04399500 |
| C  | -2.21589000 | -0.57156800 | 1.30133400  | C           | -2.64993300 | 4.10683300  | -2.83487600 |
| C  | -2.55435700 | -1.93175800 | 1.30948400  | H           | -3.63145000 | 5.28456800  | -1.32131800 |
| N  | -3.81303900 | -2.39097300 | 1.41454600  | C           | -2.12959600 | 1.82369800  | -2.19428200 |
| H  | -5.81727600 | -1.90116000 | 1.58493600  | C           | -2.11865300 | 2.88525300  | -3.15511300 |
| H  | -5.42635100 | 0.58225600  | 1.49791100  | H           | -2.58534900 | 4.93480500  | -3.53594800 |
| H  | -1.79576500 | -2.70084400 | 1.20626700  | H           | -1.60441900 | 2.70200900  | -4.09072700 |
| C  | -2.95598000 | 1.78669200  | 1.22690300  | O           | -1.46854900 | 0.75998500  | -2.37770800 |
| O  | -1.66456500 | 2.02117300  | 1.11500000  | Pd          | -2.94915600 | 0.41958600  | 0.30749500  |
| O  | -3.79575500 | 2.68575300  | 1.18216000  | C           | -4.08647600 | -3.26658400 | -2.41385700 |
| H  | -0.30197000 | -1.08965500 | 2.93664800  | C           | -3.63968300 | -3.43641600 | -1.10606000 |
| C  | -1.70745600 | -3.12643900 | -1.97751900 | C           | -3.34219600 | -2.29338100 | -0.36369000 |
| C  | -1.40256100 | -1.77232700 | -2.08736800 | C           | -3.47818800 | -1.03418600 | -0.95392000 |
| C  | -2.44193900 | -0.83933300 | -2.10726500 | C           | -3.94965200 | -0.96925200 | -2.26504400 |
| C  | -3.74847300 | -1.32485700 | -2.02377800 | N           | -4.25569300 | -2.06216600 | -2.98621600 |
| C  | -3.95441600 | -2.69926500 | -1.91976500 | H           | -4.33802500 | -4.12947900 | -3.02675900 |
| N  | -2.96075700 | -3.60160500 | -1.89339700 | H           | -3.55385900 | -4.42122200 | -0.65954200 |
| H  | -0.90757800 | -3.86435000 | -1.94857200 | H           | -4.09270600 | -0.01362200 | -2.76120600 |
| H  | -0.37626100 | -1.44098800 | -2.14375600 | C           | -2.94305100 | -2.32537100 | 1.08401300  |
| H  | -4.58013000 | -0.63040900 | -2.02557100 | O           | -2.89766500 | -1.14466200 | 1.64804100  |
| H  | -4.96565500 | -3.09504200 | -1.84535900 | O           | -2.70779700 | -3.37667300 | 1.68439100  |

|    |             |             |             |   |             |             |             |
|----|-------------|-------------|-------------|---|-------------|-------------|-------------|
| C  | -6.80618500 | -0.78211600 | 0.00321800  | O | 1.69130000  | 1.45066000  | 0.79385700  |
| C  | -7.04413300 | -1.95919500 | -0.70281100 | O | 0.60545300  | 3.37614300  | 0.46634400  |
| C  | -6.74463800 | -3.18099200 | -0.09681300 | C | 5.14659800  | 0.58091100  | -1.40607200 |
| C  | -6.25365900 | -3.16083600 | 1.21056600  | C | 6.31693900  | 1.29348600  | -1.61761300 |
| C  | -6.05544600 | -1.93397800 | 1.83782800  | C | 6.61968900  | 2.37951000  | -0.79302000 |
| N  | -6.31272200 | -0.75603600 | 1.25002700  | C | 5.71988300  | 2.70996100  | 0.22281500  |
| H  | -6.98965300 | 0.18469400  | -0.46089800 | C | 4.56404000  | 1.96021300  | 0.38428000  |
| H  | -7.41309900 | -1.94100200 | -1.72137600 | N | 4.29882200  | 0.91335000  | -0.41668400 |
| H  | -5.99693400 | -4.09142400 | 1.70182300  | H | 4.87282100  | -0.27076100 | -2.01498500 |
| H  | -5.63800600 | -1.89073200 | 2.84060700  | H | 6.99371100  | 1.01310500  | -2.41518300 |
| C  | -6.86188500 | -4.48473200 | -0.86972600 | H | 5.92624400  | 3.54666700  | 0.87868200  |
| O  | -6.47772800 | -5.53617600 | -0.27993600 | H | 3.83491500  | 2.17288500  | 1.15551700  |
| O  | -7.31534200 | -4.41236900 | -2.04875900 | C | 7.90023200  | 3.18353500  | -0.99675100 |
| K  | -6.74331300 | -6.91081400 | -2.48204000 | O | 8.08920600  | 4.14970000  | -0.20686200 |
| C  | 3.24951100  | -2.52561800 | 1.71781000  | O | 8.65522400  | 2.80989800  | -1.93673000 |
| C  | 2.66660900  | -3.64656600 | 2.31333700  | K | 10.35358500 | 4.74019500  | -1.40045900 |
| C  | 1.48364300  | -3.50903300 | 3.03328200  | C | -5.17537700 | 2.31871900  | 0.87460100  |
| C  | 0.87187700  | -2.25714400 | 3.16162100  | H | -5.88637100 | 2.36376100  | 0.04816500  |
| C  | 1.45875500  | -1.21228200 | 2.45037200  | H | -4.82476300 | 1.28691400  | 0.93165000  |
| N  | 2.59212200  | -1.35222700 | 1.74211400  | H | -5.71101000 | 2.49745800  | 1.80867400  |
| H  | 1.03763700  | -4.37963100 | 3.50626400  | C | -4.74221600 | 4.78010300  | 0.87522400  |
| H  | 3.13542700  | -4.61802300 | 2.22721500  | C | -5.93129400 | 5.04608000  | -0.07729800 |
| H  | 0.99642000  | -0.23398200 | 2.40093300  | C | -5.26351700 | 5.04403300  | 2.30790400  |
| C  | 4.59280600  | -2.55382100 | 0.96346200  | H | -3.98072300 | 5.54194500  | 0.67042400  |
| C  | 4.17366200  | -2.72611800 | -0.53192400 | C | -6.37135700 | 6.51307800  | 0.01312300  |
| C  | 4.66230400  | -3.77395900 | -1.29107800 | H | -6.77313800 | 4.40772900  | 0.21579200  |
| N  | 3.17886500  | -1.93256300 | -1.07336900 | H | -5.69167900 | 4.78744600  | -1.11041000 |
| C  | 4.15782300  | -4.02658200 | -2.58254100 | C | -5.69005600 | 6.51170000  | 2.45524200  |
| H  | 5.41234200  | -4.43780000 | -0.89821300 | H | -6.13192700 | 4.40405000  | 2.50335100  |
| C  | 2.48477900  | -2.32037000 | -2.21930600 | H | -4.52099500 | 4.79682400  | 3.06893800  |
| C  | 3.08615900  | -3.31875400 | -3.04792700 | C | -6.78109400 | 6.88433800  | 1.44363700  |
| H  | 4.59512800  | -4.82285800 | -3.17818000 | H | -7.20246500 | 6.69793800  | -0.67800100 |
| H  | 2.60722200  | -3.52880900 | -3.99737000 | H | -5.54238500 | 7.15825600  | -0.31045100 |
| Pd | 2.47064600  | -0.14996400 | -0.19699100 | H | -6.04328100 | 6.69636400  | 3.47680400  |
| C  | 1.39572600  | 2.79290900  | -3.73041600 | H | -4.81294900 | 7.15632200  | 2.30310000  |
| C  | 1.03690700  | 3.07619200  | -2.41720200 | H | -7.01581200 | 7.95365000  | 1.50990000  |
| C  | 1.37456100  | 2.14245900  | -1.43771000 | H | -7.70203900 | 6.34237600  | 1.70045100  |
| C  | 2.03420200  | 0.98549900  | -1.82285700 | C | 0.52025700  | 2.24196300  | 4.10338300  |
| C  | 2.38585200  | 0.78397000  | -3.15001700 | H | 0.48863300  | 1.20158600  | 4.43854600  |
| N  | 2.06152700  | 1.68464100  | -4.09226800 | H | 1.41538500  | 2.36094900  | 3.48191300  |
| H  | 1.15318300  | 3.48928100  | -4.52967300 | H | 0.62617600  | 2.88783200  | 4.97986000  |
| H  | 0.52318700  | 3.99054500  | -2.14362100 | C | 5.38500300  | -1.26175300 | 1.27274400  |
| H  | 2.93958000  | -0.08615300 | -3.47841400 | H | 5.89046200  | -1.37217600 | 2.23328100  |
| C  | 1.15573000  | 2.38052300  | 0.02044100  | H | 6.13910400  | -1.06958300 | 0.50966300  |



|               |             |             |             |    |             |             |             |
|---------------|-------------|-------------|-------------|----|-------------|-------------|-------------|
| H             | 4.74113400  | -0.39922300 | 1.35824300  | H  | -3.82218500 | -0.87373200 | 0.50099400  |
| C             | 5.50177100  | -3.74482900 | 1.44530100  | C  | -4.26111000 | -4.44664500 | -1.12045600 |
| C             | 6.94369100  | -3.69306700 | 0.87648800  | H  | -2.95926800 | -3.21208900 | -2.30443100 |
| C             | 5.66319600  | -3.86254100 | 2.98175000  | H  | -2.10180000 | -4.39986000 | -1.32291900 |
| H             | 5.03757700  | -4.67785700 | 1.10671000  | C  | -5.45522300 | -3.48508200 | -1.12568400 |
| C             | 7.68615500  | -5.00207600 | 1.17428600  | H  | -6.10011500 | -1.65371600 | -0.14967800 |
| H             | 7.48204600  | -2.86900600 | 1.35807800  | H  | -5.31226000 | -2.80836000 | 0.92165800  |
| H             | 6.96395000  | -3.48119700 | -0.19406100 | H  | -4.37787500 | -5.20274400 | -1.90611900 |
| C             | 6.38310700  | -5.17135400 | 3.33882200  | H  | -4.23133700 | -4.98691100 | -0.16389500 |
| H             | 6.25595900  | -3.01898900 | 3.35572600  | H  | -6.38787700 | -4.03198700 | -0.94183700 |
| H             | 4.70860300  | -3.82345300 | 3.50678600  | H  | -5.54478900 | -3.03278600 | -2.12340600 |
| C             | 7.76590700  | -5.25873300 | 2.68405000  | C  | -1.26185500 | -0.95458800 | -1.36265300 |
| H             | 8.69347600  | -4.96597100 | 0.74262400  | C  | -1.11405500 | -1.55027200 | -2.60452000 |
| H             | 7.16204800  | -5.83520300 | 0.68533800  | N  | -1.54135200 | 0.39050600  | -1.31099500 |
| H             | 6.47497100  | -5.25643200 | 4.42817200  | C  | -1.35838300 | -0.81787600 | -3.78475800 |
| H             | 5.76644000  | -6.01859800 | 3.00776300  | H  | -0.88158900 | -2.59905100 | -2.69034900 |
| H             | 8.22370100  | -6.23485500 | 2.88480000  | C  | -1.99619300 | 1.08249500  | -2.42854700 |
| H             | 8.42192200  | -4.50233300 | 3.13699900  | C  | -1.83841300 | 0.46010800  | -3.70923800 |
| C             | -0.39415700 | -2.06183500 | 3.94804100  | H  | -1.20992600 | -1.29659600 | -4.74869700 |
| H             | -1.25859900 | -2.42376400 | 3.37820600  | H  | -2.09917200 | 1.04406100  | -4.58469500 |
| H             | -0.35264800 | -2.61333700 | 4.89303300  | O  | -2.49609500 | 2.23904200  | -2.31541000 |
| H             | -0.55932700 | -1.00526000 | 4.17320800  | C  | -1.83793900 | 0.16229600  | 5.31413100  |
|               |             |             |             | H  | -2.02802100 | 1.23859900  | 5.29068900  |
|               |             |             |             | H  | -2.67898400 | -0.32249900 | 5.82235600  |
|               |             |             |             | H  | -0.94528400 | -0.01478600 | 5.92422400  |
| <b>13-ts'</b> |             |             |             | Pd | -0.59961200 | 1.53953400  | 0.16384400  |
| C             | -1.35427400 | -1.32180700 | 1.29900800  | C  | 1.93062000  | 5.04003000  | -1.79403300 |
| C             | -1.23011900 | -2.20373200 | 2.38898700  | C  | 1.90031500  | 4.82932300  | -0.41852200 |
| C             | -1.37194900 | -1.73839200 | 3.68764300  | C  | 0.97069100  | 3.92860800  | 0.09763600  |
| C             | -1.65740800 | -0.38799300 | 3.92745000  | C  | 0.08775600  | 3.29237800  | -0.78328300 |
| C             | -1.74723900 | 0.42273300  | 2.80216700  | C  | 0.18808900  | 3.55596900  | -2.15657800 |
| N             | -1.59445200 | -0.02797000 | 1.54320200  | N  | 1.10253900  | 4.40746200  | -2.64167400 |
| H             | -1.26822600 | -2.42820600 | 4.52084400  | H  | 2.64404800  | 5.73064900  | -2.23678800 |
| H             | -1.03554700 | -3.25534400 | 2.22851400  | H  | 2.59353500  | 5.32448700  | 0.25418400  |
| H             | -1.92551500 | 1.48857400  | 2.90283400  | H  | -0.48519400 | 3.09720600  | -2.86851800 |
| C             | -1.33969000 | -1.90116400 | -0.13129300 | C  | 0.93887200  | 3.54548200  | 1.53857600  |
| C             | -0.19179000 | -2.94144400 | -0.19387900 | O  | 0.23953200  | 2.45739900  | 1.78152500  |
| H             | -0.41184600 | -3.80620000 | 0.43361300  | O  | 1.52608400  | 4.17055300  | 2.41558700  |
| H             | -0.02584300 | -3.32158800 | -1.19844700 | O  | -1.70251900 | 3.23701300  | -0.10515400 |
| H             | 0.74382800  | -2.50060400 | 0.15488800  | C  | 1.69832000  | 0.02139300  | -1.04662700 |
| C             | -2.75937600 | -2.63677300 | -0.21912800 | C  | 2.87661700  | -0.70796500 | -1.11285700 |
| C             | -3.93484800 | -1.64605400 | -0.26630900 | C  | 3.45548800  | -1.18443600 | 0.06594700  |
| C             | -2.93712900 | -3.69246700 | -1.32132900 | C  | 2.82194400  | -0.89889800 | 1.27807100  |
| H             | -2.83171900 | -3.18452900 | 0.72838900  | C  | 1.64689500  | -0.16014000 | 1.27677300  |
| C             | -5.27447600 | -2.37265200 | -0.08663800 |    |             |             |             |
| H             | -3.92981200 | -1.12850900 | -1.23420300 |    |             |             |             |

|           |             |             |             |    |              |             |             |
|-----------|-------------|-------------|-------------|----|--------------|-------------|-------------|
| N         | 1.09833300  | 0.27694000  | 0.12999100  | C  | -5.23506100  | 3.50403900  | -0.19472500 |
| H         | 1.21278100  | 0.41234600  | -1.93261900 | N  | -3.19481100  | 2.36321900  | -0.54473200 |
| H         | 3.34768300  | -0.90873300 | -2.06712500 | C  | -4.82814000  | 4.49973000  | -1.08984900 |
| H         | 3.24815000  | -1.25423900 | 2.20809700  | H  | -6.20803900  | 3.57786200  | 0.26456400  |
| H         | 1.12570800  | 0.09451300  | 2.19098000  | C  | -2.75535200  | 3.36468100  | -1.33539600 |
| C         | 4.74514300  | -1.99833900 | 0.03050200  | C  | -3.55125700  | 4.47941300  | -1.61929100 |
| O         | 5.19168200  | -2.39548700 | 1.14277400  | H  | -5.50520300  | 5.31253400  | -1.33184000 |
| O         | 5.25117800  | -2.20338600 | -1.10790900 | H  | -3.16897400  | 5.26092500  | -2.26433000 |
| K         | 7.24890000  | -3.52176500 | -0.03049400 | O  | -1.54272600  | 3.29483100  | -1.88531800 |
| H         | -2.16192400 | 2.95792700  | -0.96233000 | C  | -1.17734400  | -2.70949100 | 3.26282500  |
|           |             |             |             | H  | -0.30777500  | -2.82598800 | 2.61631000  |
| <b>10</b> |             |             |             | H  | -0.82374800  | -2.49257700 | 4.27642100  |
| C         | -3.74005800 | 0.43565000  | 1.78761600  | H  | -1.71025900  | -3.66572200 | 3.30315600  |
| C         | -4.09295800 | -0.28995000 | 2.94100600  | Pd | -2.42252800  | 0.48105100  | -0.92546400 |
| C         | -3.28426200 | -1.30518700 | 3.42177700  | C  | -2.74118700  | 0.19820100  | -5.63959900 |
| C         | -2.08619200 | -1.62034100 | 2.76918500  | C  | -1.91833300  | -0.66795000 | -4.92352100 |
| C         | -1.80323700 | -0.88379800 | 1.62730800  | C  | -1.82552900  | -0.49234900 | -3.54327300 |
| N         | -2.60588600 | 0.09471300  | 1.15082700  | C  | -2.53444900  | 0.54383600  | -2.91673100 |
| H         | -3.58090800 | -1.85450100 | 4.31081400  | C  | -3.35043600  | 1.33786400  | -3.73038800 |
| H         | -5.00200600 | -0.05454500 | 3.47698800  | N  | -3.45491200  | 1.17817700  | -5.06189000 |
| H         | -0.91729400 | -1.08712500 | 1.03923000  | H  | -2.84275700  | 0.09822200  | -6.71846400 |
| C         | -4.64769400 | 1.63809200  | 1.40867500  | H  | -1.37140600  | -1.46842300 | -5.41185900 |
| C         | -6.10208000 | 1.11269500  | 1.33207500  | H  | -3.95828000  | 2.13381500  | -3.30734600 |
| H         | -6.42075000 | 0.66132600  | 2.27203500  | C  | -1.01272100  | -1.40024700 | -2.66897800 |
| H         | -6.81203800 | 1.90688100  | 1.10615900  | O  | -1.03043000  | -1.05230300 | -1.39231200 |
| H         | -6.17619500 | 0.35944800  | 0.54595400  | O  | -0.39129500  | -2.36408200 | -3.10639400 |
| C         | -4.43216900 | 2.63862900  | 2.63844800  | H  | -1.06331900  | 2.47958800  | -1.60974100 |
| C         | -3.03167200 | 3.27438800  | 2.61077200  | O  | 0.34605300   | 1.25620900  | -1.12397600 |
| C         | -5.48724300 | 3.72835200  | 2.87973400  | O  | 1.54436200   | 1.31569900  | -1.88422200 |
| H         | -4.47695200 | 1.99751900  | 3.52428200  | C  | -5.48326400  | -1.24239700 | -1.81217500 |
| C         | -2.72965900 | 3.98462000  | 3.93533600  | C  | -6.77869400  | -1.48491100 | -1.36065900 |
| H         | -2.98062700 | 4.00276100  | 1.79096900  | C  | -6.96018600  | -2.19214500 | -0.16865300 |
| H         | -2.26864600 | 2.51774600  | 2.40519100  | C  | -5.82068900  | -2.63157800 | 0.51002700  |
| C         | -5.20879400 | 4.42537600  | 4.22197500  | C  | -4.56586800  | -2.35211300 | -0.02546500 |
| H         | -5.45188800 | 4.48143900  | 2.08661000  | N  | -4.38605000  | -1.66449500 | -1.16401800 |
| H         | -6.49616200 | 3.30335900  | 2.88319900  | H  | -5.30938100  | -0.68054700 | -2.72731400 |
| C         | -3.80099200 | 5.03390900  | 4.25881400  | H  | -7.64174500  | -1.12691600 | -1.90998600 |
| H         | -1.73854300 | 4.45167700  | 3.89396000  | H  | -5.92462700  | -3.17590400 | 1.44132700  |
| H         | -2.69450000 | 3.23841100  | 4.74135700  | H  | -3.66308800  | -2.67953700 | 0.48332400  |
| H         | -5.96226100 | 5.20251200  | 4.39657000  | C  | -8.35409800  | -2.44864600 | 0.38750500  |
| H         | -5.31218800 | 3.69565000  | 5.03702600  | O  | -8.42347900  | -3.05531700 | 1.49499800  |
| H         | -3.60827000 | 5.48782100  | 5.23824500  | O  | -9.32821600  | -2.02923400 | -0.30122600 |
| H         | -3.74243500 | 5.84338500  | 3.51773000  | K  | -11.03839200 | -2.94224000 | 1.44773900  |
| C         | -4.36193300 | 2.47204600  | 0.14362300  | C  | 2.50794000   | -1.31598500 | 1.46530300  |

|   |             |             |             |              |             |             |             |
|---|-------------|-------------|-------------|--------------|-------------|-------------|-------------|
| C | 2.21467500  | -1.55584800 | 2.81843400  | Pd           | 3.13676400  | 0.72443200  | -0.77026900 |
| C | 1.48806100  | -0.64138900 | 3.56377800  | C            | 5.59945400  | 3.31049000  | -3.87945000 |
| C | 1.01171600  | 0.53163200  | 2.96866500  | C            | 4.96805300  | 3.89769900  | -2.78476000 |
| C | 1.37814400  | 0.73645100  | 1.64580500  | C            | 4.27479700  | 3.05862200  | -1.91470900 |
| N | 2.10804400  | -0.14799400 | 0.93381100  | C            | 4.22999300  | 1.69495400  | -2.18288100 |
| H | 1.27377100  | -0.84789800 | 4.60798000  | C            | 4.90876100  | 1.18556900  | -3.28227700 |
| H | 2.54011000  | -2.47305400 | 3.28943000  | N            | 5.58356000  | 1.99157300  | -4.12026000 |
| H | 1.09684100  | 1.63940400  | 1.12253000  | H            | 6.15238700  | 3.92192100  | -4.58846700 |
| C | 3.20276300  | -2.44392000 | 0.67291200  | H            | 5.01746900  | 4.96530800  | -2.59786100 |
| C | 4.45924300  | -2.86310000 | 1.47682900  | H            | 4.94311800  | 0.12554400  | -3.50712800 |
| H | 4.17400100  | -3.31886000 | 2.42571400  | C            | 3.61836500  | 3.53650900  | -0.66143100 |
| H | 5.06561100  | -3.59395700 | 0.94536400  | O            | 3.11037200  | 2.55984100  | 0.07720200  |
| H | 5.08535900  | -1.99708100 | 1.69422900  | O            | 3.56955700  | 4.70486400  | -0.31134500 |
| C | 2.11171700  | -3.62492100 | 0.67254400  | H            | 1.83306800  | 0.24463300  | -2.99231400 |
| C | 0.93376500  | -3.29996800 | -0.25166200 | H            | 0.01385500  | 0.32252600  | -1.23301300 |
| C | 2.61699200  | -5.04921500 | 0.39903300  | C            | 5.98630300  | -0.25521300 | -0.36974700 |
| H | 1.73675700  | -3.64238800 | 1.70089400  | C            | 7.19578700  | -0.43821000 | 0.28276500  |
| C | -0.20886000 | -4.30884900 | -0.09996400 | C            | 7.35012200  | 0.02875600  | 1.58976100  |
| H | 1.26071700  | -3.31054400 | -1.29608600 | C            | 6.26830900  | 0.67179200  | 2.19574400  |
| H | 0.55675100  | -2.29087300 | -0.07892900 | C            | 5.08320300  | 0.82793700  | 1.49256900  |
| C | 1.47368700  | -6.05604100 | 0.60886500  | N            | 4.95410600  | 0.35996100  | 0.23724900  |
| H | 2.96161900  | -5.14168400 | -0.63527800 | H            | 5.82920000  | -0.60015100 | -1.38248600 |
| H | 3.46037700  | -5.30079000 | 1.04993600  | H            | 8.01617900  | -0.93898300 | -0.21585900 |
| C | 0.28349500  | -5.74543900 | -0.30688500 | H            | 6.35609300  | 1.04437700  | 3.20870200  |
| H | -0.99641700 | -4.05850400 | -0.81821500 | H            | 4.22372900  | 1.32648800  | 1.92036000  |
| H | -0.64712600 | -4.22217300 | 0.90241600  | C            | 8.66491100  | -0.16543300 | 2.34032400  |
| H | 1.84307500  | -7.07195400 | 0.42539500  | O            | 8.70750800  | 0.27945600  | 3.52038600  |
| H | 1.14588000  | -6.02296200 | 1.65737200  | O            | 9.58724100  | -0.75583200 | 1.71352000  |
| H | -0.52979300 | -6.46001300 | -0.13070600 | K            | 11.18049800 | -0.56622000 | 3.79828000  |
| H | 0.59590000  | -5.87326000 | -1.35304600 |              |             |             |             |
| C | 3.56178700  | -2.22999900 | -0.81278200 | <b>11-ts</b> |             |             |             |
| C | 4.26903200  | -3.22778200 | -1.46967500 | C            | -2.08651000 | 0.58948200  | 2.17278200  |
| N | 3.03443900  | -1.21501500 | -1.56929200 | C            | -2.14936000 | 0.38150900  | 3.56335000  |
| C | 4.28621300  | -3.28441600 | -2.87035500 | C            | -1.22554500 | -0.42327900 | 4.20966700  |
| H | 4.75992000  | -4.00853600 | -0.91162700 | C            | -0.19647200 | -1.03172600 | 3.48372500  |
| C | 2.93512200  | -1.32628400 | -2.91771300 | C            | -0.19081000 | -0.79171800 | 2.11677000  |
| C | 3.55648400  | -2.37684300 | -3.60692300 | N            | -1.10571800 | -0.02329600 | 1.48792000  |
| H | 4.83384200  | -4.07823500 | -3.36746300 | H            | -1.29760000 | -0.57130900 | 5.28335800  |
| H | 3.47341500  | -2.41798500 | -4.68581800 | H            | -2.91988700 | 0.86066100  | 4.15069800  |
| O | 2.28186600  | -0.40971600 | -3.60965400 | H            | 0.55164900  | -1.25164800 | 1.47778600  |
| C | 0.14588900  | 1.51498300  | 3.70210800  | C            | -3.12514300 | 1.56236900  | 1.56009100  |
| H | -0.85388600 | 1.09557500  | 3.86011700  | C            | -4.51539700 | 1.10654200  | 2.07507100  |
| H | 0.56293000  | 1.74958300  | 4.68645600  | H            | -4.60854500 | 1.26600900  | 3.14967600  |
| H | 0.03851500  | 2.44390700  | 3.13773100  | H            | -5.33159500 | 1.65244800  | 1.60763000  |

|    |             |             |             |   |             |             |             |
|----|-------------|-------------|-------------|---|-------------|-------------|-------------|
| H  | -4.66238500 | 0.04431600  | 1.87444800  | O | 0.72601400  | -3.74957400 | -1.87830500 |
| C  | -2.71877800 | 2.98442900  | 2.18141600  | H | -0.18962200 | 1.45070900  | -2.14369000 |
| C  | -1.43341400 | 3.54706700  | 1.55049700  | O | 0.80577500  | 0.61699000  | -1.11870500 |
| C  | -3.80421800 | 4.07147400  | 2.19912900  | O | 2.16402500  | 1.40518000  | -1.86428800 |
| H  | -2.49873100 | 2.77068300  | 3.23260000  | C | -4.52486800 | -1.21695000 | -0.70197000 |
| C  | -0.93054200 | 4.77017700  | 2.32690800  | C | -5.76140300 | -1.71707200 | -0.30511300 |
| H  | -1.63730200 | 3.84845200  | 0.51588900  | C | -5.82957800 | -2.55249300 | 0.81283400  |
| H  | -0.65581000 | 2.77803800  | 1.50358300  | C | -4.64100200 | -2.85046200 | 1.48543300  |
| C  | -3.31240700 | 5.29652700  | 2.98807300  | C | -3.44695800 | -2.30500200 | 1.02313600  |
| H  | -4.04102200 | 4.38965600  | 1.17886800  | N | -3.38858800 | -1.50069900 | -0.04897700 |
| H  | -4.72900500 | 3.69137200  | 2.64459000  | H | -4.43379600 | -0.56149500 | -1.56261900 |
| C  | -2.00984000 | 5.85573700  | 2.40423400  | H | -6.66589300 | -1.46668100 | -0.84681700 |
| H  | -0.02246600 | 5.16361500  | 1.85421500  | H | -4.66196000 | -3.49510200 | 2.35617700  |
| H  | -0.65136000 | 4.46448000  | 3.34384200  | H | -2.50577100 | -2.50239200 | 1.52831500  |
| H  | -4.09140600 | 6.06800900  | 2.99015800  | C | -7.16243100 | -3.11775900 | 1.28929600  |
| H  | -3.14722700 | 5.01075100  | 4.03621400  | O | -7.13094300 | -3.86106400 | 2.31088100  |
| H  | -1.65717100 | 6.70364900  | 3.00351700  | O | -8.18647500 | -2.79555000 | 0.62248000  |
| H  | -2.20545400 | 6.24136700  | 1.39386000  | K | -9.71550100 | -4.26384200 | 2.15664000  |
| C  | -3.18164900 | 1.80723900  | 0.03798600  | C | 4.12229400  | -0.22688900 | 1.66359400  |
| C  | -4.23257300 | 2.55909800  | -0.47997100 | C | 4.07682200  | -0.26222000 | 3.06428900  |
| N  | -2.12232300 | 1.52987300  | -0.77368800 | C | 3.17519500  | 0.52724000  | 3.76469400  |
| C  | -4.11754400 | 3.15310600  | -1.74312500 | C | 2.26905500  | 1.34227600  | 3.08155800  |
| H  | -5.11914600 | 2.74897000  | 0.10388900  | C | 2.37906800  | 1.35045900  | 1.69472300  |
| C  | -1.95148200 | 2.19169000  | -1.93925700 | N | 3.28853100  | 0.61591300  | 1.02703600  |
| C  | -2.94415600 | 3.03354000  | -2.45925100 | H | 3.16310800  | 0.49528000  | 4.84981300  |
| H  | -4.93653000 | 3.75017400  | -2.13121400 | H | 4.73963700  | -0.91561000 | 3.61484500  |
| H  | -2.77651000 | 3.53027800  | -3.40700800 | H | 1.74270500  | 1.97678300  | 1.08250500  |
| O  | -0.83377700 | 2.02793500  | -2.63516500 | C | 5.05104200  | -1.22678900 | 0.94192000  |
| C  | 0.83676400  | -1.90822300 | 4.13204000  | C | 6.44752200  | -1.13013800 | 1.60783100  |
| H  | 1.68025200  | -2.08524100 | 3.46313500  | H | 6.41829200  | -1.53140900 | 2.62188200  |
| H  | 1.21492000  | -1.45142600 | 5.05141100  | H | 7.20416900  | -1.69391800 | 1.06609000  |
| H  | 0.40601600  | -2.87950100 | 4.40274900  | H | 6.77846800  | -0.09310300 | 1.66735400  |
| Pd | -1.22389800 | -0.36875100 | -0.61746200 | C | 4.37610700  | -2.64337400 | 1.27349800  |
| C  | -1.80059900 | -2.15174800 | -4.97880400 | C | 3.03889700  | -2.83484000 | 0.54480100  |
| C  | -0.92595200 | -2.74028600 | -4.06987600 | C | 5.24269300  | -3.90112600 | 1.10324400  |
| C  | -0.78727100 | -2.14293300 | -2.81701600 | H | 4.16101700  | -2.58557300 | 2.34585400  |
| C  | -1.49545000 | -0.97477300 | -2.51558700 | C | 2.28681800  | -4.05670800 | 1.08393400  |
| C  | -2.37247700 | -0.48645900 | -3.48800000 | H | 3.21813700  | -2.97834500 | -0.52770100 |
| N  | -2.52405900 | -1.05650200 | -4.69568700 | H | 2.41285900  | -1.94292500 | 0.63046900  |
| H  | -1.94085500 | -2.58058900 | -5.96889400 | C | 4.50532900  | -5.12092400 | 1.68020900  |
| H  | -0.37669500 | -3.64552600 | -4.30874100 | H | 5.43651600  | -4.09273700 | 0.04351100  |
| H  | -2.99366000 | 0.38438500  | -3.30361100 | H | 6.21182900  | -3.78244200 | 1.59821600  |
| C  | 0.04917600  | -2.73602900 | -1.72591300 | C | 3.14737700  | -5.32192700 | 0.99791200  |
| O  | -0.03158400 | -2.07671800 | -0.58732900 | H | 1.36368300  | -4.17650600 | 0.51272500  |

|    |            |             |             |           |             |            |             |
|----|------------|-------------|-------------|-----------|-------------|------------|-------------|
| H  | 2.01231300 | -3.87861500 | 2.13259500  | C         | 9.64574300  | 2.76411600 | 1.66841300  |
| H  | 5.12941600 | -6.01495400 | 1.56383700  | O         | 9.64222600  | 3.36074400 | 2.78048500  |
| H  | 4.35443800 | -4.97811900 | 2.75937700  | O         | 10.65378400 | 2.40222300 | 1.00082400  |
| H  | 2.62013300 | -6.17464600 | 1.44305200  | K         | 12.27281600 | 3.39712800 | 2.81196400  |
| H  | 3.31255400 | -5.57058700 | -0.06006800 |           |             |            |             |
| C  | 5.18140700 | -1.18024500 | -0.59636100 | <b>12</b> |             |            |             |
| C  | 6.07278100 | -2.05082200 | -1.20733200 | C         | 3.71354800  | 1.50756900 | -1.89542300 |
| N  | 4.32198400 | -0.47697600 | -1.39875700 | C         | 3.91982900  | 1.50692600 | -3.28675900 |
| C  | 5.97621200 | -2.31985300 | -2.58075600 | C         | 2.97165800  | 0.97829800 | -4.14453300 |
| H  | 6.81092200 | -2.57741100 | -0.62423200 | C         | 1.77790500  | 0.44871400 | -3.63922000 |
| C  | 4.12558800 | -0.81754000 | -2.70320400 | C         | 1.64857300  | 0.44235900 | -2.25680900 |
| C  | 4.96114400 | -1.76211400 | -3.32516500 | N         | 2.59295600  | 0.93770200 | -1.42747000 |
| H  | 6.67668300 | -3.00925300 | -3.04086800 | H         | 3.15140100  | 0.98562500 | -5.21574700 |
| H  | 4.80095500 | -1.98909200 | -4.37197300 | H         | 4.81886300  | 1.93831700 | -3.70405300 |
| O  | 3.17184500 | -0.24019400 | -3.39403800 | H         | 0.78083300  | 0.00771500 | -1.77886100 |
| C  | 1.24952600 | 2.19079300  | 3.78628400  | C         | 4.73268500  | 2.26904700 | -1.02197300 |
| H  | 0.24858100 | 2.00898500  | 3.39105700  | C         | 6.14135300  | 1.74681000 | -1.39745600 |
| H  | 1.24015700 | 1.97877800  | 4.85806400  | H         | 6.38214700  | 1.97523200 | -2.43634300 |
| H  | 1.46925500 | 3.25491600  | 3.64994700  | H         | 6.92439400  | 2.19371800 | -0.78874200 |
| Pd | 3.88171200 | 1.49271300  | -0.86206400 | H         | 6.18947400  | 0.66341500 | -1.26663600 |
| C  | 5.21149300 | 4.18958700  | -4.51575100 | C         | 4.53159600  | 3.78519600 | -1.49993000 |
| C  | 4.51771700 | 4.72699300  | -3.43306300 | C         | 3.16437100  | 4.35254500 | -1.08213200 |
| C  | 4.16985800 | 3.86312000  | -2.39663300 | C         | 5.63685300  | 4.78828700 | -1.14083900 |
| C  | 4.51272900 | 2.51896200  | -2.49359400 | H         | 4.53720500  | 3.72772600 | -2.59348200 |
| C  | 5.22748500 | 2.06889400  | -3.59622400 | C         | 2.89239900  | 5.68848100 | -1.78502100 |
| N  | 5.56975500 | 2.89960500  | -4.59619000 | H         | 3.15179500  | 4.50608400 | 0.00422400  |
| H  | 5.50356700 | 4.82243400  | -5.35042300 | H         | 2.36258100  | 3.64244000 | -1.30703600 |
| H  | 4.26219700 | 5.78027600  | -3.38131700 | C         | 5.38646800  | 6.11953800 | -1.86736300 |
| H  | 5.55469900 | 1.03959800  | -3.69369800 | H         | 5.64439300  | 4.97719700 | -0.06294400 |
| C  | 3.49395800 | 4.30992400  | -1.14121700 | H         | 6.62272700  | 4.39643900 | -1.41095500 |
| O  | 3.36255200 | 3.34971700  | -0.24032100 | C         | 4.01174700  | 6.70107900 | -1.51321200 |
| O  | 3.12194700 | 5.45499800  | -0.93258800 | H         | 1.92551500  | 6.09084200 | -1.46019700 |
| H  | 2.64924100 | 0.46137800  | -2.79444100 | H         | 2.81440500  | 5.51312500 | -2.86714700 |
| H  | 1.14679300 | -0.29132900 | -1.21725400 | H         | 6.17827300  | 6.83316000 | -1.61079300 |
| C  | 6.92552200 | 1.47493800  | -0.66917500 | H         | 5.44532200  | 5.95799100 | -2.95265500 |
| C  | 8.17928700 | 1.76348800  | -0.15165500 | H         | 3.83329900  | 7.62696600 | -2.07293300 |
| C  | 8.28142200 | 2.44193700  | 1.06518800  | H         | 4.00106000  | 6.96836600 | -0.44721800 |
| C  | 7.10318800 | 2.80931400  | 1.71996300  | C         | 4.56927700  | 2.29475800 | 0.51330300  |
| C  | 5.87806900 | 2.49808900  | 1.14852500  | C         | 5.56336800  | 2.88296300 | 1.27339300  |
| N  | 5.80285500 | 1.83535300  | -0.01983900 | N         | 3.38534200  | 1.98508100 | 1.12848500  |
| H  | 6.80430800 | 0.94430500  | -1.60431900 | C         | 5.30165000  | 3.27051900 | 2.60597300  |
| H  | 9.07411200 | 1.46457400  | -0.68323300 | H         | 6.51855500  | 3.13135100 | 0.83897300  |
| H  | 7.14991200 | 3.33370700  | 2.66628000  | C         | 3.01243200  | 2.52725600 | 2.35502200  |
| H  | 4.94039000 | 2.77131400  | 1.61476700  | C         | 4.04112600  | 3.15589300 | 3.12651800  |

|    |             |             |             |    |             |             |             |
|----|-------------|-------------|-------------|----|-------------|-------------|-------------|
| H  | 6.09906300  | 3.71460600  | 3.19453100  | H  | -2.98708500 | -0.01702000 | -4.13001200 |
| H  | 3.78130100  | 3.50065400  | 4.12079600  | H  | -1.20568800 | 2.08322600  | -0.12176400 |
| O  | 1.82297400  | 2.41752200  | 2.76735600  | C  | -3.31675400 | -1.58748100 | -1.95299400 |
| C  | 0.71295800  | -0.09498600 | -4.54657600 | C  | -4.66877400 | -1.51027600 | -2.70631300 |
| H  | -0.10538500 | -0.53907800 | -3.98163800 | H  | -4.51399500 | -1.28726400 | -3.76305100 |
| H  | 0.30054200  | 0.70053200  | -5.17662300 | H  | -5.22300200 | -2.44498500 | -2.65802700 |
| H  | 1.12946300  | -0.85494200 | -5.21589900 | H  | -5.29700100 | -0.72364100 | -2.28367600 |
| Pd | 2.43463400  | 0.22414300  | 0.61179600  | C  | -2.25596700 | -2.47040900 | -2.77005300 |
| C  | 1.84613000  | -2.21319500 | 4.64190100  | C  | -0.96459200 | -2.68231600 | -1.96853500 |
| C  | 1.36815600  | -2.69493400 | 3.42680400  | C  | -2.74904600 | -3.81195800 | -3.33275000 |
| C  | 1.60409400  | -1.92308900 | 2.28979800  | H  | -2.00866800 | -1.86176900 | -3.64653500 |
| C  | 2.27363200  | -0.71089500 | 2.41911400  | C  | 0.12850600  | -3.36302800 | -2.79853300 |
| C  | 2.75611700  | -0.32383000 | 3.66418700  | H  | -1.17088700 | -3.30675000 | -1.09420600 |
| N  | 2.53852800  | -1.06981700 | 4.76057300  | H  | -0.59194200 | -1.73438500 | -1.57229100 |
| H  | 1.68145200  | -2.77250900 | 5.55985900  | C  | -1.66042000 | -4.44783800 | -4.21207400 |
| H  | 0.82719000  | -3.63046800 | 3.34630700  | H  | -2.97510200 | -4.50652000 | -2.51841800 |
| H  | 3.33847300  | 0.57723900  | 3.80796100  | H  | -3.66784200 | -3.67833100 | -3.91315700 |
| C  | 1.22086400  | -2.36423900 | 0.91583700  | C  | -0.36989600 | -4.67411800 | -3.41580000 |
| O  | 1.47558500  | -1.45923400 | -0.01751100 | H  | 0.99573300  | -3.53963700 | -2.15451000 |
| O  | 0.76013100  | -3.46481100 | 0.65564800  | H  | 0.45474900  | -2.69267800 | -3.60331700 |
| H  | 0.97942200  | 1.76363700  | 1.69963100  | H  | -2.02831900 | -5.39562200 | -4.62303400 |
| O  | 0.67058400  | 1.17647700  | 0.91435300  | H  | -1.45037000 | -3.79192000 | -5.06884200 |
| O  | -1.13679700 | -0.04220200 | 1.97094900  | H  | 0.40320700  | -5.11574900 | -4.05651600 |
| C  | 5.23487100  | -0.63501800 | 1.23345400  | H  | -0.56931500 | -5.39911800 | -2.61377400 |
| C  | 6.43790900  | -1.29532200 | 1.04044900  | C  | -3.50431500 | -2.31034200 | -0.59571600 |
| C  | 6.59851500  | -2.12536400 | -0.07106300 | C  | -4.16686700 | -3.52371000 | -0.59603700 |
| C  | 5.52608300  | -2.26791100 | -0.95472800 | N  | -2.85506700 | -1.92651400 | 0.55035800  |
| C  | 4.34370000  | -1.58685500 | -0.71147200 | C  | -4.04446800 | -4.40042300 | 0.50545200  |
| N  | 4.21967000  | -0.78282000 | 0.36147000  | H  | -4.71467800 | -3.85376400 | -1.46401000 |
| H  | 5.06720800  | 0.01991500  | 2.07704600  | C  | -2.54965000 | -2.81867400 | 1.58216400  |
| H  | 7.24981100  | -1.16838700 | 1.74554900  | C  | -3.20960500 | -4.09391000 | 1.54335200  |
| H  | 5.62032800  | -2.90554900 | -1.82473500 | H  | -4.58181000 | -5.34446400 | 0.49312000  |
| H  | 3.48163300  | -1.67107200 | -1.35958600 | H  | -3.04367900 | -4.76231200 | 2.38062200  |
| C  | 7.91635800  | -2.85494700 | -0.31832800 | O  | -1.78473000 | -2.48533500 | 2.52039900  |
| O  | 7.97690000  | -3.56539700 | -1.35935400 | C  | -0.54177100 | 3.54375100  | -2.34705900 |
| O  | 8.82447800  | -2.67886400 | 0.53967800  | H  | 0.38834800  | 3.36209600  | -2.89725600 |
| K  | 10.44435200 | -4.27029900 | -0.78598500 | H  | -1.08859600 | 4.32817200  | -2.88046600 |
| C  | -2.70331400 | -0.17167700 | -1.99377700 | H  | -0.28053900 | 3.91688600  | -1.35369200 |
| C  | -2.58382800 | 0.45665500  | -3.24567700 | Pd | -2.93165200 | 0.06005100  | 1.08927800  |
| C  | -1.92309900 | 1.66810200  | -3.37681000 | C  | -4.71308600 | 0.13849600  | 5.47261500  |
| C  | -1.35101100 | 2.28075300  | -2.25723800 | C  | -4.19332000 | 1.28511600  | 4.87786300  |
| C  | -1.56220300 | 1.64492400  | -1.04161300 | C  | -3.70055800 | 1.17454900  | 3.57784100  |
| N  | -2.21457800 | 0.47100000  | -0.92092600 | C  | -3.72961600 | -0.06424600 | 2.94703800  |
| H  | -1.83427300 | 2.12886700  | -4.35615400 | C  | -4.29021700 | -1.15375400 | 3.60306900  |

|    |              |             |             |    |             |             |             |
|----|--------------|-------------|-------------|----|-------------|-------------|-------------|
| N  | -4.77661100  | -1.04947800 | 4.85199200  | H  | -3.94819400 | -0.95964800 | -1.13257000 |
| H  | -5.10774200  | 0.17382600  | 6.48546200  | H  | -3.78302700 | -0.80857800 | 0.61197600  |
| H  | -4.17752200  | 2.24132400  | 5.39051800  | C  | -4.36636600 | -4.27117900 | -1.19410600 |
| H  | -4.37445800  | -2.12831300 | 3.13727100  | H  | -3.06589400 | -3.01283200 | -2.34906300 |
| C  | -3.19682500  | 2.34461700  | 2.79346500  | H  | -2.21143200 | -4.27244200 | -1.45594100 |
| O  | -2.91664300  | 2.05713500  | 1.53678900  | C  | -5.53122600 | -3.27709600 | -1.11122700 |
| O  | -3.09060900  | 3.47313400  | 3.25499600  | H  | -6.09697100 | -1.48814800 | -0.01509300 |
| H  | -1.13820000  | -1.00031400 | 2.24627000  | H  | -5.31126400 | -2.72248100 | 0.96612400  |
| H  | -0.09554700  | 0.53269500  | 1.31952600  | H  | -4.52614600 | -4.97752500 | -2.01712900 |
| C  | -5.82474900  | -0.66394300 | 0.57286600  | H  | -4.32519600 | -4.86470300 | -0.27039900 |
| C  | -7.11590500  | -0.50651700 | 0.09275900  | H  | -6.47376700 | -3.80776800 | -0.93169200 |
| C  | -7.44842500  | 0.64458100  | -0.62458800 | H  | -5.63415200 | -2.76633900 | -2.07890200 |
| C  | -6.45649800  | 1.60664000  | -0.82945700 | C  | -1.28632900 | -0.89295900 | -1.33402000 |
| C  | -5.18326600  | 1.39476200  | -0.32232800 | C  | -1.21169700 | -1.41433100 | -2.61770700 |
| N  | -4.88246400  | 0.27266800  | 0.35694600  | N  | -1.52861400 | 0.44848300  | -1.20771900 |
| H  | -5.52671300  | -1.54310600 | 1.12702200  | C  | -1.54412900 | -0.62073800 | -3.72618500 |
| H  | -7.86252600  | -1.27069500 | 0.26943300  | H  | -0.95937200 | -2.45109100 | -2.77447200 |
| H  | -6.68318700  | 2.50997900  | -1.38194800 | C  | -2.00010500 | 1.19024600  | -2.24480300 |
| H  | -4.38510600  | 2.11428900  | -0.44912400 | C  | -2.01445700 | 0.66209100  | -3.54625600 |
| C  | -8.85682600  | 0.84357900  | -1.17690900 | H  | -1.48393600 | -1.04447900 | -4.72326000 |
| O  | -9.06437700  | 1.91276500  | -1.81480300 | H  | -2.36028700 | 1.28618900  | -4.36105100 |
| O  | -9.68597600  | -0.07990500 | -0.94777600 | O  | -2.40883500 | 2.42120800  | -2.03033200 |
| K  | -11.56508400 | 1.22942500  | -2.23581300 | C  | -1.90054900 | 0.09195700  | 5.34134300  |
|    |              |             |             | H  | -1.88827100 | 1.18458100  | 5.36101100  |
| 7' |              |             |             | H  | -2.86550100 | -0.24719900 | 5.73409000  |
| C  | -1.33786400  | -1.31243800 | 1.30160900  | H  | -1.12484000 | -0.27566600 | 6.02131500  |
| C  | -1.40835000  | -2.23134900 | 2.36304000  | Pd | -0.54829800 | 1.49715900  | 0.29592700  |
| C  | -1.56645400  | -1.79642900 | 3.66903700  | C  | 1.93077900  | 4.93084500  | -1.85256700 |
| C  | -1.68085000  | -0.42914900 | 3.95035300  | C  | 1.88874300  | 4.82695500  | -0.46466700 |
| C  | -1.55802100  | 0.42790300  | 2.86611200  | C  | 1.12817400  | 3.79387300  | 0.08089100  |
| N  | -1.37236000  | -0.00552000 | 1.60305400  | C  | 0.43945500  | 2.93317700  | -0.76760100 |
| H  | -1.61635100  | -2.52294200 | 4.47494100  | C  | 0.55896500  | 3.09158200  | -2.14378700 |
| H  | -1.35901000  | -3.29360800 | 2.16608800  | N  | 1.29433900  | 4.08326500  | -2.67398400 |
| H  | -1.58033100  | 1.50219200  | 2.99837700  | H  | 2.50851000  | 5.71939000  | -2.32855500 |
| C  | -1.34920800  | -1.86551100 | -0.13884200 | H  | 2.43326200  | 5.50932300  | 0.17948500  |
| C  | -0.22605800  | -2.92476700 | -0.24492900 | H  | 0.08560300  | 2.42079900  | -2.85031200 |
| H  | -0.43389500  | -3.77497800 | 0.40580500  | C  | 1.04422100  | 3.52867400  | 1.54618500  |
| H  | -0.12426500  | -3.31711200 | -1.25468200 | O  | 0.30069100  | 2.46960200  | 1.84978800  |
| H  | 0.73387200   | -2.49715400 | 0.05022800  | O  | 1.59862800  | 4.19371300  | 2.40478100  |
| C  | -2.79379500  | -2.55885100 | -0.23874300 | H  | -2.39607200 | 2.63021800  | -1.01608400 |
| C  | -3.93775900  | -1.53163400 | -0.19585200 | O  | -2.18767600 | 2.66435900  | 0.45495700  |
| C  | -3.02623600  | -3.54444500 | -1.39341100 | C  | 1.68969100  | 0.03564600  | -1.09054700 |
| H  | -2.86024300  | -3.15996000 | 0.67349800  | C  | 2.84221800  | -0.72584800 | -1.19768900 |
| C  | -5.29125000  | -2.23150000 | -0.01665800 | C  | 3.48467300  | -1.17127400 | -0.04036500 |

|   |             |             |             |    |             |             |             |
|---|-------------|-------------|-------------|----|-------------|-------------|-------------|
| C | 2.93775700  | -0.82598500 | 1.19744500  | H  | -5.49234300 | -2.95583600 | -2.15272400 |
| C | 1.78179200  | -0.06203900 | 1.24551900  | C  | -1.21671300 | -0.93955100 | -1.31903300 |
| N | 1.17545300  | 0.34676000  | 0.11489900  | C  | -1.05600200 | -1.50314100 | -2.57197500 |
| H | 1.16409900  | 0.39995700  | -1.96263700 | N  | -1.50736900 | 0.39796200  | -1.23747900 |
| H | 3.24383300  | -0.97482700 | -2.17189500 | C  | -1.31472800 | -0.73880000 | -3.73178900 |
| H | 3.41327800  | -1.15559900 | 2.11271900  | H  | -0.80790800 | -2.54667300 | -2.68135200 |
| H | 1.32483900  | 0.23315700  | 2.18073000  | C  | -1.97182200 | 1.13846800  | -2.33159400 |
| C | 4.75215500  | -2.01756400 | -0.12741300 | C  | -1.81076500 | 0.53056400  | -3.62618400 |
| O | 5.26245500  | -2.37743500 | 0.96881300  | H  | -1.16195200 | -1.18962200 | -4.70858500 |
| O | 5.17163600  | -2.27976000 | -1.28804500 | H  | -2.07344200 | 1.13022900  | -4.49066900 |
| K | 7.21223900  | -3.60948800 | -0.29374400 | O  | -2.44573900 | 2.28693600  | -2.17768000 |
| H | -1.85416200 | 3.52864300  | 0.74743400  | C  | -2.00142600 | 0.15230100  | 5.32690300  |
|   |             |             |             | H  | -2.01418000 | 1.24523700  | 5.32121200  |
| 7 |             |             |             | H  | -2.96342700 | -0.19879000 | 5.71679100  |
| C | -1.34363700 | -1.32520100 | 1.32842800  | H  | -1.22672000 | -0.18010700 | 6.02626300  |
| C | -1.42407400 | -2.22555100 | 2.40698500  | Pd | -0.61898100 | 1.48699600  | 0.26778900  |
| C | -1.61545100 | -1.76639900 | 3.70024100  | C  | 1.66683900  | 5.03831900  | -1.87768500 |
| C | -1.75087500 | -0.39469900 | 3.95032300  | C  | 1.56796600  | 4.96635600  | -0.49121700 |
| C | -1.61975900 | 0.44091500  | 2.85004900  | C  | 0.87764800  | 3.88496900  | 0.05623500  |
| N | -1.40354200 | -0.01564800 | 1.60108000  | C  | 0.30141900  | 2.94211100  | -0.79154400 |
| H | -1.67302300 | -2.47678900 | 4.52021700  | C  | 0.47589900  | 3.07969500  | -2.16571200 |
| H | -1.35314200 | -3.29098500 | 2.23405200  | N  | 1.14952000  | 4.11302800  | -2.70074800 |
| H | -1.65580000 | 1.51834000  | 2.95184600  | H  | 2.19423800  | 5.86350800  | -2.35140000 |
| C | -1.30247300 | -1.89813700 | -0.10378900 | H  | 2.02045100  | 5.71068900  | 0.15606000  |
| C | -0.14120300 | -2.92173400 | -0.14841500 | H  | 0.09166100  | 2.35064400  | -2.86845500 |
| H | -0.33156500 | -3.75791200 | 0.52627500  | C  | 0.78552800  | 3.64445900  | 1.53088400  |
| H | 0.00212300  | -3.34270500 | -1.14124400 | O  | 0.22327800  | 2.49685100  | 1.84430300  |
| H | 0.79487400  | -2.44891900 | 0.15525400  | O  | 1.22744900  | 4.42347900  | 2.36808200  |
| C | -2.71603800 | -2.63977500 | -0.22696800 | O  | -2.20567500 | 2.63739100  | 0.49297000  |
| C | -3.89361700 | -1.65010200 | -0.22940300 | C  | 1.72202200  | 0.03472600  | -1.07648100 |
| C | -2.88844000 | -3.64693700 | -1.37378900 | C  | 2.90132500  | -0.68972300 | -1.16837800 |
| H | -2.79262600 | -3.23190000 | 0.69108800  | C  | 3.55076000  | -1.09562500 | -0.00035400 |
| C | -5.23157400 | -2.38788300 | -0.08704300 | C  | 2.98213800  | -0.74804500 | 1.22748800  |
| H | -3.88847300 | -1.08451100 | -1.16972300 | C  | 1.80059100  | -0.02043700 | 1.25042000  |
| H | -3.78578100 | -0.91724200 | 0.57717200  | N  | 1.18470000  | 0.35240900  | 0.11456800  |
| C | -4.21119200 | -4.41203400 | -1.20852600 | H  | 1.18659100  | 0.36648000  | -1.95625100 |
| H | -2.91021300 | -3.12587300 | -2.33550800 | H  | 3.31889900  | -0.94134000 | -2.13538500 |
| H | -2.05086400 | -4.35143300 | -1.40278800 | H  | 3.46281100  | -1.04699200 | 2.15078300  |
| C | -5.40647200 | -3.45225000 | -1.17588200 | H  | 1.32671500  | 0.27770200  | 2.17702300  |
| H | -6.05887200 | -1.66896400 | -0.11957500 | C  | 4.84572900  | -1.89923200 | -0.06422300 |
| H | -5.27047800 | -2.86936600 | 0.90011900  | O  | 5.36463900  | -2.22111200 | 1.04090200  |
| H | -4.32395400 | -5.13315900 | -2.02687300 | O  | 5.28358800  | -2.17112600 | -1.21680200 |
| H | -4.18348200 | -4.99336300 | -0.27631400 | K  | 7.36933900  | -3.38521400 | -0.18647100 |
| H | -6.33929300 | -4.00750800 | -1.02045700 | H  | -2.49823700 | 2.67508500  | -0.44619600 |



|              |             |             |             |           |             |             |             |
|--------------|-------------|-------------|-------------|-----------|-------------|-------------|-------------|
|              |             |             |             | H         | -2.17803800 | 1.43580200  | 5.37102400  |
| <b>13-ts</b> |             |             |             | H         | -2.82025100 | -0.17710500 | 5.73214900  |
| C            | -1.42877600 | -0.76541400 | 1.16814600  | H         | -1.09409400 | 0.13964200  | 5.91615700  |
| C            | -1.19324000 | -1.69583100 | 2.19777600  | Pd        | -1.69974400 | 2.11096500  | 0.26140700  |
| C            | -1.34398200 | -1.34995600 | 3.52846900  | C         | 2.69728900  | 2.59896000  | -1.30529000 |
| C            | -1.74428000 | -0.05388100 | 3.87668900  | C         | 2.30956500  | 3.09115900  | -0.06037700 |
| C            | -1.89734800 | 0.83855400  | 2.82916700  | C         | 0.95269400  | 3.07550800  | 0.26147900  |
| N            | -1.72304500 | 0.49228700  | 1.53051200  | C         | 0.08473100  | 2.55628700  | -0.68786200 |
| H            | -1.15941800 | -2.08991200 | 4.30161400  | C         | 0.52023700  | 2.09180900  | -1.92003900 |
| H            | -0.90121600 | -2.70741200 | 1.95194500  | N         | 1.83157500  | 2.11270500  | -2.20740700 |
| H            | -2.13124600 | 1.87765900  | 3.01672200  | H         | 3.74480100  | 2.59783000  | -1.59559100 |
| C            | -1.39528500 | -1.27527400 | -0.28436200 | H         | 3.02753700  | 3.47502800  | 0.65718100  |
| C            | 0.02410600  | -1.86158200 | -0.49809100 | H         | -0.15258500 | 1.70784100  | -2.67680100 |
| H            | 0.23705700  | -2.65152000 | 0.22367200  | C         | 0.40089100  | 3.54616100  | 1.57792600  |
| H            | 0.15145800  | -2.29093100 | -1.48981600 | O         | -0.86428600 | 3.25133800  | 1.76712100  |
| H            | 0.77048300  | -1.07124200 | -0.37392500 | O         | 1.09004800  | 4.14529700  | 2.39439900  |
| C            | -2.52409300 | -2.40806500 | -0.30184800 | O         | -1.57203600 | 3.80442900  | -0.80746700 |
| C            | -3.93209900 | -1.80615400 | -0.15048000 | H         | -2.25285100 | 3.56164500  | -1.49131400 |
| C            | -2.51546400 | -3.41376800 | -1.46324100 |           |             |             |             |
| H            | -2.33388100 | -3.00876200 | 0.59187600  | <b>14</b> |             |             |             |
| C            | -4.97397000 | -2.90303100 | 0.10115300  | C         | -1.38056100 | 1.26716100  | 1.07899600  |
| H            | -4.19220000 | -1.25934600 | -1.06566900 | C         | -1.50102300 | 2.57602400  | 1.57942000  |
| H            | -3.95508700 | -1.07692000 | 0.66731500  | C         | -0.44405900 | 3.47038300  | 1.56708900  |
| C            | -3.53084700 | -4.53442900 | -1.18792400 | C         | 0.78698000  | 3.08524400  | 1.03073600  |
| H            | -2.79454200 | -2.92073100 | -2.39915500 | C         | 0.86198000  | 1.79057600  | 0.54176300  |
| H            | -1.51671900 | -3.84027200 | -1.60283000 | N         | -0.17129500 | 0.91504100  | 0.57167600  |
| C            | -4.94429300 | -3.97009000 | -0.99981200 | H         | -0.58148300 | 4.47125100  | 1.96592400  |
| H            | -5.97362600 | -2.45868100 | 0.17501800  | H         | -2.44842600 | 2.91047100  | 1.97336500  |
| H            | -4.76638900 | -3.37669500 | 1.07082300  | H         | 1.76977500  | 1.41906200  | 0.08633900  |
| H            | -3.51618200 | -5.25426600 | -2.01476900 | C         | -2.70003300 | 0.42942100  | 1.03896200  |
| H            | -3.23345300 | -5.08426500 | -0.28418000 | C         | -3.46561500 | 0.69635500  | 2.36199200  |
| H            | -5.65025300 | -4.77662500 | -0.76837200 | H         | -3.85197600 | 1.71442900  | 2.41000100  |
| H            | -5.27693600 | -3.51920500 | -1.94534100 | H         | -4.32575000 | 0.03966900  | 2.46549000  |
| C            | -1.72832000 | -0.31455000 | -1.44656800 | H         | -2.80989300 | 0.52859400  | 3.22062900  |
| C            | -1.54718800 | -0.79966000 | -2.73087800 | C         | -3.51374200 | 1.02784700  | -0.19129400 |
| N            | -2.35432200 | 0.89037700  | -1.27357900 | C         | -2.82842900 | 0.77796000  | -1.54507000 |
| C            | -2.11984800 | -0.13173500 | -3.83173900 | C         | -4.98444100 | 0.58553200  | -0.26267900 |
| H            | -1.03490900 | -1.73267800 | -2.89900000 | H         | -3.51813100 | 2.11123100  | -0.01510600 |
| C            | -2.96028900 | 1.57780600  | -2.33075200 | C         | -3.56119100 | 1.50186100  | -2.68292900 |
| C            | -2.86443300 | 0.99895200  | -3.63766900 | H         | -2.81637100 | -0.29993700 | -1.75152800 |
| H            | -1.98175400 | -0.53703200 | -4.83017200 | H         | -1.78397300 | 1.10364300  | -1.51613400 |
| H            | -3.33283600 | 1.53863700  | -4.45274500 | C         | -5.72009700 | 1.32625300  | -1.38891300 |
| O            | -3.51115900 | 2.69273800  | -2.12901600 | H         | -5.03700500 | -0.49204000 | -0.45436300 |
| C            | -1.97135800 | 0.36503400  | 5.30089200  | H         | -5.49139600 | 0.76949000  | 0.68921900  |

|           |             |             |             |    |             |             |             |
|-----------|-------------|-------------|-------------|----|-------------|-------------|-------------|
| C         | -5.03969000 | 1.10366100  | -2.74342000 | H  | -0.96351300 | 4.81485500  | 0.71045200  |
| H         | -3.06583900 | 1.28667200  | -3.63707500 | H  | -2.09198300 | 2.78244000  | 1.46122700  |
| H         | -3.48482500 | 2.58673500  | -2.52465000 | H  | 2.15468400  | 2.33440300  | -0.87457000 |
| H         | -6.76438800 | 0.99423200  | -1.42583600 | C  | -1.44364400 | 0.18496000  | 1.09567100  |
| H         | -5.73773800 | 2.40171700  | -1.16365500 | C  | -1.68120500 | 0.32054900  | 2.61962100  |
| H         | -5.55591700 | 1.66862100  | -3.52877900 | H  | -2.21456900 | 1.24299800  | 2.85673800  |
| H         | -5.11629800 | 0.04118700  | -3.01408900 | H  | -2.27315200 | -0.50327100 | 3.01445000  |
| C         | -2.59859500 | -1.08775400 | 0.85638800  | H  | -0.72221900 | 0.33208400  | 3.14635100  |
| C         | -3.62751100 | -1.98704900 | 1.15100500  | C  | -2.80807200 | 0.33848800  | 0.28372400  |
| N         | -1.51771100 | -1.60560500 | 0.27293500  | C  | -2.59530200 | 0.20495000  | -1.23400900 |
| C         | -3.47187600 | -3.34644900 | 0.82691200  | C  | -3.98179500 | -0.55143700 | 0.72159700  |
| H         | -4.55051700 | -1.65711600 | 1.60229000  | H  | -3.13844200 | 1.36496200  | 0.47403400  |
| C         | -1.30006300 | -2.91631000 | -0.04446700 | C  | -3.86543300 | 0.58565400  | -2.00578800 |
| C         | -2.32120700 | -3.84322400 | 0.23089600  | H  | -2.32125600 | -0.83041000 | -1.47122800 |
| H         | -4.28471900 | -4.02886600 | 1.05818000  | H  | -1.75914500 | 0.83250200  | -1.56234400 |
| H         | -2.19283600 | -4.89348600 | -0.00408700 | C  | -5.26078200 | -0.14869500 | -0.02922500 |
| O         | -0.11761500 | -3.09277300 | -0.55426900 | H  | -3.76242000 | -1.60047800 | 0.50064500  |
| C         | 1.97334200  | 4.00537800  | 0.97302700  | H  | -4.14691900 | -0.47503700 | 1.80118600  |
| H         | 2.83038600  | 3.51463400  | 0.50616400  | C  | -5.07022600 | -0.24403600 | -1.54745100 |
| H         | 1.73707800  | 4.90919300  | 0.40106600  | H  | -3.70024600 | 0.45741300  | -3.08217500 |
| H         | 2.26500900  | 4.32408300  | 1.97970100  | H  | -4.07670800 | 1.65192200  | -1.84335700 |
| Pd        | 0.27084900  | -0.95401100 | -0.12350000 | H  | -6.09208000 | -0.78805200 | 0.29094400  |
| C         | 6.88176700  | -1.03846000 | -0.11591500 | H  | -5.53284400 | 0.88155500  | 0.23979300  |
| C         | 5.56567200  | -1.35806800 | 0.20113400  | H  | -5.97865500 | 0.08164300  | -2.06833200 |
| C         | 4.52643000  | -0.48925500 | -0.14433700 | H  | -4.90713000 | -1.29570900 | -1.82197400 |
| C         | 4.88255900  | 0.70904700  | -0.78553000 | C  | -0.89008200 | -1.21871200 | 0.78073500  |
| C         | 6.23933800  | 0.95026900  | -1.05028100 | C  | -1.51343000 | -2.32935100 | 1.32365700  |
| N         | 7.22072600  | 0.10293800  | -0.73532600 | N  | 0.06073600  | -1.39432700 | -0.17673500 |
| H         | 7.69269300  | -1.71674800 | 0.13783600  | C  | -1.21437700 | -3.61477600 | 0.81286300  |
| H         | 5.32829300  | -2.28112200 | 0.71832200  | H  | -2.27295100 | -2.22682900 | 2.08312500  |
| H         | 6.52475000  | 1.88073900  | -1.54286600 | C  | 0.33110200  | -2.62805500 | -0.79432000 |
| C         | 3.11175700  | -0.87630900 | 0.21774100  | C  | -0.35193800 | -3.77064100 | -0.23738500 |
| O         | 2.21726000  | -0.52194700 | -0.65193200 | H  | -1.70432300 | -4.48117000 | 1.25029900  |
| O         | 2.90385100  | -1.49414900 | 1.26643200  | H  | -0.12302200 | -4.74327300 | -0.66019400 |
| O         | 3.93289400  | 1.62464200  | -1.11419800 | O  | 1.14479600  | -2.68128700 | -1.73414800 |
| H         | 4.36712600  | 2.40478400  | -1.49599600 | C  | 1.41308800  | 4.97865200  | -0.70514500 |
|           |             |             |             | H  | 2.36635600  | 4.71072100  | -1.16727300 |
|           |             |             |             | H  | 0.80605200  | 5.50487900  | -1.45004300 |
| <b>1b</b> |             |             |             | H  | 1.60902300  | 5.68201400  | 0.11103100  |
| C         | -0.61659200 | 1.41834900  | 0.67332500  | Pd | 1.72286400  | -0.26996200 | -0.10863500 |
| C         | -1.15664300 | 2.69366100  | 0.92644000  | C  | 4.19130800  | -0.62466600 | 0.07348000  |
| C         | -0.51992400 | 3.84575500  | 0.50178800  | O  | 3.40732200  | -1.62445700 | 0.00889000  |
| C         | 0.69156300  | 3.76333200  | -0.19744000 | O  | 3.67374800  | 0.55051500  | 0.05442200  |
| C         | 1.20146200  | 2.48965200  | -0.38387500 | C  | 5.67695900  | -0.79549900 | 0.13960800  |
| N         | 0.57162500  | 1.36926900  | 0.04679600  |    |             |             |             |

|    |            |             |             |    |             |             |             |
|----|------------|-------------|-------------|----|-------------|-------------|-------------|
| H  | 6.10406700 | -0.57289600 | -0.84484800 | H  | 5.06710900  | 0.78181600  | 4.28801400  |
| H  | 6.10464800 | -0.09112800 | 0.85784200  | O  | 3.14371800  | -0.04805000 | 2.73087000  |
| H  | 5.93534400 | -1.81946700 | 0.41445500  | C  | 1.25547100  | 0.92065200  | -4.89870500 |
| 7b |            |             |             | H  | 0.42874800  | 0.35563700  | -4.46561900 |
| C  | 4.039563   | 2.10611200  | -1.81952200 | H  | 0.84571200  | 1.76990300  | -5.45129100 |
| C  | 3.93222000 | 2.85607200  | -3.00330800 | H  | 1.76519400  | 0.27104300  | -5.62051300 |
| C  | 3.04285600 | 2.49509500  | -4.00341000 | Pd | 3.78744800  | -0.55717800 | -0.37058600 |
| C  | 2.21631600 | 1.37943800  | -3.83926400 | C  | 5.57209200  | -4.59541100 | 1.43630000  |
| C  | 2.35966000 | 0.68685600  | -2.64585600 | C  | 4.93620600  | -4.56103800 | 0.19792200  |
| N  | 3.24328700 | 1.02731600  | -1.68055300 | C  | 4.42149600  | -3.34006200 | -0.23644300 |
| H  | 2.98716000 | 3.08575200  | -4.91295700 | C  | 4.53316400  | -2.18717300 | 0.56377400  |
| H  | 4.54641600 | 3.73352800  | -3.14973600 | C  | 5.21637100  | -2.34053800 | 1.77761200  |
| H  | 1.78172200 | -0.20750500 | -2.45502400 | N  | 5.72062800  | -3.50972300 | 2.21194600  |
| C  | 5.04186700 | 2.60758700  | -0.74948000 | H  | 5.98595000  | -5.52532100 | 1.82078100  |
| C  | 6.40634500 | 2.76644300  | -1.46568800 | H  | 4.84132900  | -5.44776000 | -0.42088800 |
| H  | 6.34454700 | 3.48249100  | -2.28537900 | H  | 5.38383500  | -1.49823700 | 2.43980500  |
| H  | 7.18712900 | 3.12214300  | -0.79654200 | C  | 3.71115100  | -3.18950700 | -1.55056800 |
| H  | 6.72219000 | 1.80150200  | -1.87382500 | O  | 3.21908200  | -1.97846400 | -1.73551300 |
| C  | 4.44646600 | 4.02448000  | -0.29913200 | O  | 3.58250300  | -4.10165700 | -2.36152700 |
| C  | 3.13918300 | 3.86767400  | 0.49650900  | H  | 2.41133800  | 0.14868600  | 2.09597800  |
| C  | 5.39809300 | 4.97390300  | 0.44354700  | O  | 1.29701800  | 0.99629900  | 1.06487000  |
| H  | 4.19831200 | 4.53082700  | -1.23781900 | O  | 0.29287800  | -0.02772600 | 1.14882400  |
| C  | 2.46006800 | 5.21933900  | 0.74786100  | C  | -2.34161100 | -7.52848700 | 2.39933000  |
| H  | 3.35359400 | 3.39696900  | 1.46303400  | C  | -1.26840300 | -6.74401300 | 1.97937200  |
| H  | 2.45078400 | 3.19964600  | -0.03028200 | C  | -1.35203300 | -6.07971600 | 0.75374000  |
| C  | 4.72404300 | 6.33877900  | 0.65783600  | C  | -2.51978200 | -6.24628600 | 0.00429600  |
| H  | 5.65932400 | 4.56183100  | 1.42341600  | C  | -3.53673800 | -7.05566100 | 0.50493900  |
| H  | 6.33092300 | 5.10390100  | -0.11430300 | N  | -3.46719100 | -7.69268700 | 1.68570900  |
| C  | 3.41342300 | 6.19896800  | 1.44108300  | H  | -2.29757100 | -8.04924200 | 3.35454800  |
| H  | 1.55785800 | 5.06499100  | 1.35100800  | H  | -0.37838300 | -6.63518700 | 2.58876200  |
| H  | 2.13740800 | 5.64704300  | -0.21082000 | H  | -2.62316000 | -5.73338300 | -0.94439700 |
| H  | 5.41366300 | 7.00899900  | 1.18441800  | H  | -4.45483800 | -7.19579700 | -0.06349400 |
| H  | 4.51771000 | 6.80032800  | -0.31794000 | C  | -0.23099500 | -5.16575100 | 0.26725200  |
| H  | 2.93406300 | 7.17782400  | 1.56162400  | O  | -0.44937300 | -4.53756700 | -0.80775400 |
| H  | 3.63772900 | 5.82933100  | 2.45157800  | O  | 0.79951700  | -5.08625000 | 0.99006300  |
| C  | 5.24533700 | 1.81870800  | 0.55909600  | K  | 0.91400100  | -2.46902100 | 0.20814200  |
| C  | 6.28076100 | 2.17714300  | 1.42066500  | C  | -2.04604000 | 0.90050800  | -2.16368400 |
| N  | 4.31107900 | 0.93366400  | 1.00620900  | C  | -2.00807700 | 1.63764600  | -3.36104500 |
| C  | 6.25877200 | 1.75871100  | 2.75629000  | C  | -1.18388700 | 2.74269500  | -3.49742600 |
| H  | 7.07991600 | 2.82197000  | 1.09018500  | C  | -0.34403300 | 3.12410400  | -2.44758700 |
| C  | 4.20686800 | 0.64925000  | 2.32105200  | C  | -0.41686500 | 2.35083500  | -1.29746900 |
| C  | 5.17757200 | 1.04570100  | 3.24336100  | N  | -1.24793000 | 1.29546600  | -1.15894300 |
| H  | 7.06343500 | 2.05221300  | 3.42256600  | H  | -1.18306300 | 3.30243100  | -4.42780300 |
|    |            |             |             | H  | -2.61879800 | 1.34261200  | -4.20224100 |

|    |             |             |             |    |              |             |             |
|----|-------------|-------------|-------------|----|--------------|-------------|-------------|
| H  | 0.17129100  | 2.60401700  | -0.42594700 | H  | -2.06619800  | 0.63909100  | 6.73832000  |
| C  | -2.93878500 | -0.35726400 | -2.12101700 | H  | -0.88461700  | 2.50861200  | 5.52999500  |
| C  | -4.33402600 | 0.09107800  | -2.63195800 | H  | -3.06904900  | -1.22997200 | 3.20096500  |
| H  | -4.27504300 | 0.50929700  | -3.63616300 | C  | -0.73173400  | 2.74878400  | 2.77540300  |
| H  | -5.04544100 | -0.72885900 | -2.68398500 | O  | -0.96354700  | 2.60227400  | 1.48688500  |
| H  | -4.74440000 | 0.85468400  | -1.96524000 | O  | -0.17115100  | 3.73247500  | 3.24199600  |
| C  | -2.22550200 | -1.34627400 | -3.15429400 | H  | 1.62606400   | 0.92789400  | 0.14732300  |
| C  | -0.84866300 | -1.80030000 | -2.64294700 | C  | -4.59610300  | 0.73532100  | 1.10543900  |
| C  | -3.03209700 | -2.57345200 | -3.60392400 | C  | -5.88696000  | 1.20750800  | 0.92298500  |
| H  | -2.06745000 | -0.74253100 | -4.05569000 | C  | -6.08551400  | 2.47155400  | 0.36412000  |
| C  | -0.06947800 | -2.57870200 | -3.70902000 | C  | -4.96204300  | 3.22578500  | 0.01685300  |
| H  | -1.00017700 | -2.46198000 | -1.78566700 | C  | -3.69543700  | 2.70172400  | 0.22661900  |
| H  | -0.26646400 | -0.93647500 | -2.30454300 | N  | -3.52867800  | 1.47441500  | 0.75255300  |
| C  | -2.26600100 | -3.35100100 | -4.68671900 | H  | -4.39926600  | -0.24052600 | 1.52754200  |
| H  | -3.20401600 | -3.23988900 | -2.75289300 | H  | -6.73715100  | 0.59937500  | 1.20575200  |
| H  | -4.01416700 | -2.27406500 | -3.98520200 | H  | -5.08258800  | 4.21088200  | -0.41651000 |
| C  | -0.87978900 | -3.78526200 | -4.19413200 | H  | -2.79708400  | 3.25071800  | -0.02319200 |
| H  | 0.89449300  | -2.90013900 | -3.29842000 | C  | -7.49355500  | 3.01171100  | 0.13177900  |
| H  | 0.15086100  | -1.91800000 | -4.55871500 | O  | -7.57699500  | 4.16107700  | -0.38318200 |
| H  | -2.85376700 | -4.22503000 | -4.99229200 | O  | -8.44752300  | 2.25896700  | 0.47283200  |
| H  | -2.15468700 | -2.71835000 | -5.57887000 | K  | -10.20220900 | 4.04602200  | -0.31958800 |
| H  | -0.34215500 | -4.31390900 | -4.99115400 |    |              |             |             |
| H  | -0.99119100 | -4.48308000 | -3.35474500 | 7c |              |             |             |
| C  | -3.12087500 | -1.14954000 | -0.80144000 | C  | 4.629475     | -2.11765300 | -0.02334200 |
| C  | -4.14310200 | -2.07944400 | -0.74854900 | C  | 4.89691000   | -3.26816800 | 0.74860700  |
| N  | -2.20451200 | -1.12541000 | 0.22199800  | C  | 4.17066100   | -3.54681000 | 1.89974900  |
| C  | -4.22165100 | -3.00814500 | 0.31465000  | C  | 3.15418100   | -2.67707200 | 2.31345500  |
| H  | -4.86390800 | -2.15530000 | -1.54553400 | C  | 2.93123000   | -1.56954500 | 1.50518400  |
| C  | -2.11567900 | -2.16196200 | 1.17064400  | N  | 3.63987300   | -1.30220900 | 0.38547100  |
| C  | -3.22619300 | -3.07317800 | 1.24435100  | H  | 4.39762000   | -4.43950200 | 2.47674000  |
| H  | -5.05999300 | -3.69793000 | 0.35435400  | H  | 5.67987700   | -3.95427000 | 0.45335600  |
| H  | -3.21683600 | -3.80172000 | 2.04651500  | H  | 2.17269500   | -0.83940500 | 1.75940000  |
| O  | -1.12514100 | -2.23752100 | 1.92491500  | C  | 5.51792600   | -1.89285700 | -1.27791000 |
| C  | 0.56309100  | 4.31890900  | -2.52562700 | C  | 6.97728600   | -1.81783200 | -0.75969600 |
| H  | 1.44529700  | 4.18622500  | -1.89790400 | H  | 7.26021000   | -2.74041200 | -0.24802500 |
| H  | 0.88967900  | 4.49673400  | -3.55300800 | H  | 7.69550000   | -1.67840400 | -1.56635700 |
| H  | 0.04009900  | 5.21962500  | -2.18217200 | H  | 7.06446500   | -0.97013100 | -0.07394500 |
| Pd | -1.57147200 | 0.73038500  | 0.92056800  | C  | 5.26467200   | -3.18711300 | -2.18178900 |
| C  | -2.00034100 | 0.64988300  | 5.65278000  | C  | 3.87986600   | -3.15583000 | -2.85117500 |
| C  | -1.33546100 | 1.67933400  | 4.99469300  | C  | 6.33317500   | -3.54902900 | -3.22362300 |
| C  | -1.28668100 | 1.63290400  | 3.60084500  | H  | 5.25909200   | -4.02541900 | -1.48025900 |
| C  | -1.86212200 | 0.55577500  | 2.93208400  | C  | 3.54127600   | -4.52095400 | -3.46036300 |
| C  | -2.54593100 | -0.40685900 | 3.66862100  | H  | 3.87612200   | -2.40159200 | -3.64799700 |
| N  | -2.61295200 | -0.35638000 | 5.00984500  | H  | 3.11213300   | -2.85571700 | -2.13160600 |

|    |             |             |             |   |             |             |             |
|----|-------------|-------------|-------------|---|-------------|-------------|-------------|
| C  | 6.01558600  | -4.92548400 | -3.83202600 | C | 3.91164400  | 4.32418300  | 2.99425100  |
| H  | 6.35212000  | -2.80814900 | -4.02904600 | N | 4.45903600  | 5.17619000  | 2.11384700  |
| H  | 7.33034700  | -3.56629100 | -2.77239500 | H | 5.82644800  | 5.38148500  | 0.57453100  |
| C  | 4.61762100  | -4.95726700 | -4.46266000 | H | 6.59336400  | 3.00127500  | 0.63924600  |
| H  | 2.56016300  | -4.48112300 | -3.94821400 | H | 3.81311100  | 2.33096600  | 3.82917000  |
| H  | 3.46537500  | -5.26653200 | -2.65659400 | H | 3.13995100  | 4.73176300  | 3.64376800  |
| H  | 6.77488900  | -5.18110500 | -4.58046700 | C | 5.73182000  | 1.04088800  | 2.36104900  |
| H  | 6.07711000  | -5.69060000 | -3.04558800 | O | 5.23174000  | 0.34474500  | 3.28989200  |
| H  | 4.39738100  | -5.95984300 | -4.84830800 | O | 6.61834600  | 0.65989300  | 1.53864700  |
| H  | 4.59888600  | -4.27543500 | -5.32439600 | K | 6.96815700  | -1.54688400 | 2.92381200  |
| C  | 5.25226000  | -0.70476400 | -2.22115400 | C | -1.42036600 | -1.79412900 | 1.80462500  |
| C  | 6.14180500  | -0.44809000 | -3.26097800 | C | -1.02474800 | -3.04991100 | 2.29637600  |
| N  | 4.05128500  | -0.06455800 | -2.22135100 | C | -0.18894800 | -3.87406300 | 1.56060800  |
| C  | 5.71653000  | 0.29382000  | -4.37067400 | C | 0.30068400  | -3.44822000 | 0.32285200  |
| H  | 7.13517000  | -0.86927400 | -3.25883900 | C | -0.13757600 | -2.20536700 | -0.11352300 |
| C  | 3.59526600  | 0.55296400  | -3.33002100 | N | -0.97642400 | -1.41801400 | 0.59420400  |
| C  | 4.40964100  | 0.73710000  | -4.45361300 | H | 0.09112800  | -4.84668700 | 1.95383200  |
| H  | 6.40400000  | 0.47168800  | -5.19132700 | H | -1.36428100 | -3.38496300 | 3.26604200  |
| H  | 4.01560600  | 1.24593900  | -5.32462700 | H | 0.16113000  | -1.81673100 | -1.07595900 |
| O  | 2.34710900  | 1.01842500  | -3.36538600 | C | -2.26364900 | -0.90284500 | 2.73769600  |
| C  | 2.36907900  | -2.90245700 | 3.57405100  | C | -3.40521000 | -1.80008000 | 3.29184400  |
| H  | 1.46783500  | -2.28863000 | 3.59469700  | H | -3.01021300 | -2.55112600 | 3.97620600  |
| H  | 2.07735700  | -3.95212000 | 3.67291400  | H | -4.15352900 | -1.23592600 | 3.84284800  |
| H  | 2.97432700  | -2.64579200 | 4.45185200  | H | -3.91147900 | -2.31748300 | 2.47449800  |
| Pd | 3.32876700  | 0.64504700  | -0.40203000 | C | -1.21933700 | -0.51187300 | 3.89174900  |
| C  | 2.97691500  | 5.29626500  | -1.25954200 | C | -0.18562200 | 0.50303800  | 3.38843100  |
| C  | 2.23378700  | 4.69393000  | -0.24766700 | C | -1.78647400 | -0.05347100 | 5.24370900  |
| C  | 2.37746300  | 3.32072700  | -0.06042100 | H | -0.69358300 | -1.44924400 | 4.10340100  |
| C  | 3.22456200  | 2.58045000  | -0.89653500 | C | 0.94718500  | 0.71370100  | 4.39775300  |
| C  | 3.95285500  | 3.29426900  | -1.85472300 | H | -0.67030300 | 1.46801200  | 3.20667300  |
| N  | 3.83765500  | 4.62106200  | -2.03928800 | H | 0.23472900  | 0.20098900  | 2.42715400  |
| H  | 2.89718000  | 6.36608500  | -1.44203300 | C | -0.64348900 | 0.08617100  | 6.26268400  |
| H  | 1.57944600  | 5.26916400  | 0.39922700  | H | -2.27011800 | 0.92315000  | 5.14667700  |
| H  | 4.66724200  | 2.79276400  | -2.50293300 | H | -2.53843400 | -0.75782600 | 5.61477300  |
| C  | 1.70944500  | 2.58136700  | 1.05718600  | C | 0.40643700  | 1.09496500  | 5.78030900  |
| O  | 2.01859200  | 1.29369000  | 1.08720800  | H | 1.61530100  | 1.48850500  | 4.01094700  |
| O  | 0.95673200  | 3.11986500  | 1.86215700  | H | 1.53755800  | -0.20811700 | 4.48437700  |
| H  | 1.85270800  | 0.82090400  | -2.53517500 | H | -1.05218400 | 0.39340900  | 7.23271100  |
| O  | 0.53787600  | 0.42778700  | -1.24348300 | H | -0.16780900 | -0.89286900 | 6.41502700  |
| O  | -0.68405300 | 1.14070200  | -1.27801400 | H | 1.22581100  | 1.16969300  | 6.50585700  |
| C  | 5.40056900  | 4.68350800  | 1.29264800  | H | -0.05751400 | 2.09006600  | 5.72414300  |
| C  | 5.82930500  | 3.35839200  | 1.31967200  | C | -2.85819000 | 0.43550900  | 2.23840300  |
| C  | 5.26353800  | 2.48225600  | 2.24999600  | C | -3.68360100 | 1.11723300  | 3.12856300  |
| C  | 4.27767800  | 2.98412900  | 3.10087100  | N | -2.50743500 | 1.06575200  | 1.07399600  |

|    |             |             |             |    |             |             |             |
|----|-------------|-------------|-------------|----|-------------|-------------|-------------|
| C  | -4.02012600 | 2.45618000  | 2.91760300  | H  | -6.05895800 | 6.45800900  | -2.09445200 |
| H  | -4.03361600 | 0.63487000  | 4.02564500  | H  | -4.56446800 | 6.22894300  | -3.05040400 |
| C  | -2.75191600 | 2.39035900  | 0.90192000  | H  | -5.83689200 | 4.97366000  | -3.03053300 |
| C  | -3.50316000 | 3.12518600  | 1.83141200  | H  | -6.37724400 | 4.32724200  | -0.73882700 |
| H  | -4.65381100 | 2.97220600  | 3.63148600  | C  | -7.96931500 | 2.67312600  | -1.59069000 |
| H  | -3.69272900 | 4.17388000  | 1.64611100  | O  | -7.76690200 | 3.87784200  | -1.45409700 |
| O  | -2.28020400 | 2.94114400  | -0.19882300 | O  | -8.64994000 | 2.20428700  | -2.63689300 |
| C  | 1.24682200  | -4.27224600 | -0.50225400 | H  | -8.87891900 | 2.96389100  | -3.20570700 |
| H  | 2.28286200  | -4.07962100 | -0.20555100 | C  | -7.57958000 | 1.60321900  | -0.61891200 |
| H  | 1.05647900  | -5.34051500 | -0.36496200 | H  | -6.85676000 | 1.98552100  | 0.10042800  |
| H  | 1.15339500  | -4.03455900 | -1.56433100 | H  | -8.48022400 | 1.28332500  | -0.08222200 |
| Pd | -2.16720300 | -0.07254200 | -0.66041200 | H  | -7.17429400 | 0.73688200  | -1.14289500 |
| C  | -4.95985700 | 1.78759700  | -4.01166900 |    |             |             |             |
| C  | -4.00647500 | 0.82021900  | -4.31741200 | 7d |             |             |             |
| C  | -3.22346300 | 0.32821900  | -3.27254400 | C  | -0.60952600 | 1.39232100  | 0.61076800  |
| C  | -3.40127600 | 0.83768600  | -1.99146300 | C  | -0.88275000 | 2.64680700  | 1.18711400  |
| C  | -4.39874100 | 1.77649200  | -1.76944900 | C  | -0.27871300 | 3.80083100  | 0.72094000  |
| N  | -5.16530700 | 2.24587400  | -2.76767400 | C  | 0.61491700  | 3.73909800  | -0.35510500 |
| H  | -5.59856700 | 2.20128600  | -4.78803100 | C  | 0.89711500  | 2.47291300  | -0.84047200 |
| H  | -3.88085900 | 0.43679000  | -5.32472400 | N  | 0.32476800  | 1.34609300  | -0.35358300 |
| H  | -4.62029300 | 2.16803300  | -0.78678700 | H  | -0.51108200 | 4.75527000  | 1.18413400  |
| C  | -2.25808200 | -0.79952700 | -3.42980100 | H  | -1.58990900 | 2.72289600  | 2.00113800  |
| O  | -1.76840800 | -1.23135900 | -2.27958900 | H  | 1.62854100  | 2.33133100  | -1.62457500 |
| O  | -1.97344400 | -1.31873900 | -4.49893000 | C  | -1.46447200 | 0.19460700  | 1.06885700  |
| H  | 0.89827700  | 0.64990300  | -0.35313700 | C  | -1.29001900 | 0.09608500  | 2.60592500  |
| C  | -4.99173500 | -0.79785000 | 0.29821100  | H  | -1.63947200 | 1.00449900  | 3.09888300  |
| C  | -6.08880700 | -1.60085000 | 0.57051700  | H  | -1.84920600 | -0.73324400 | 3.03433300  |
| C  | -6.01026700 | -2.97459200 | 0.33142800  | H  | -0.23488200 | -0.04506900 | 2.85350100  |
| C  | -4.81764900 | -3.48946700 | -0.18233200 | C  | -2.95304200 | 0.63405000  | 0.67825600  |
| C  | -3.75720000 | -2.63188800 | -0.43945900 | C  | -3.15474400 | 0.69443300  | -0.84557200 |
| N  | -3.84953800 | -1.31346000 | -0.19104200 | C  | -4.10985200 | -0.14527600 | 1.32286400  |
| H  | -5.01555700 | 0.26832600  | 0.47587800  | H  | -3.05159600 | 1.65548200  | 1.05750500  |
| H  | -6.99980300 | -1.16924800 | 0.96557200  | C  | -4.49457300 | 1.35472100  | -1.19681300 |
| H  | -4.72542700 | -4.55040900 | -0.37925800 | H  | -3.13317000 | -0.32336200 | -1.25478500 |
| H  | -2.81916600 | -2.98484800 | -0.84871200 | H  | -2.33422900 | 1.24154900  | -1.32329700 |
| C  | -7.19660900 | -3.88745900 | 0.62666400  | C  | -5.44676500 | 0.54109600  | 1.00075200  |
| O  | -7.03437500 | -5.11605300 | 0.38792500  | H  | -4.14507900 | -1.16716300 | 0.93367900  |
| O  | -8.23329700 | -3.33051700 | 1.08330800  | H  | -3.97792300 | -0.21272700 | 2.40760300  |
| K  | -9.49730500 | -5.63284500 | 1.14750400  | C  | -5.66802500 | 0.64361900  | -0.51286500 |
| C  | -4.66106800 | 5.06456400  | -1.26406800 | H  | -4.63307900 | 1.36068300  | -2.28442600 |
| O  | -5.44540000 | 4.44377600  | -0.39303500 | H  | -4.47008100 | 2.40526100  | -0.87526200 |
| O  | -3.44378200 | 5.08425400  | -1.07886400 | H  | -6.26723500 | -0.01555700 | 1.46878600  |
| H  | -2.72262900 | 3.82049300  | -0.39616200 | H  | -5.45600000 | 1.54808500  | 1.44050400  |
| C  | -5.31621700 | 5.73172200  | -2.43865300 | H  | -6.60789300 | 1.16610100  | -0.72754700 |

|       |             |             |             |    |             |             |             |
|-------|-------------|-------------|-------------|----|-------------|-------------|-------------|
| H     | -5.76615800 | -0.36901700 | -0.92865000 | H  | 7.23346700  | 0.78915000  | -0.05163100 |
| C     | -1.24762100 | -1.19063600 | 0.42403600  | H  | 6.13322600  | 1.03103800  | -1.40839300 |
| C     | -1.92517300 | -2.26678500 | 0.96772000  | C  | 5.42815200  | 2.13549700  | 1.88099200  |
| N     | -0.58001900 | -1.36091300 | -0.75966300 | C  | 4.24289300  | 2.04517900  | 2.85746500  |
| C     | -2.01032600 | -3.48689100 | 0.26100400  | C  | 6.73822800  | 1.86620000  | 2.63484300  |
| H     | -2.45216700 | -2.17028900 | 1.90287600  | H  | 5.49386500  | 3.17506500  | 1.54359900  |
| C     | -0.74065800 | -2.50328400 | -1.55807100 | C  | 4.39657900  | 3.06099900  | 3.99627400  |
| C     | -1.47622500 | -3.59768400 | -0.99166100 | H  | 4.19721700  | 1.03405000  | 3.28089600  |
| H     | -2.53483100 | -4.32419400 | 0.71270900  | H  | 3.29427900  | 2.20997400  | 2.33746700  |
| H     | -1.54561600 | -4.50585600 | -1.57973900 | C  | 6.91193500  | 2.89924800  | 3.76055700  |
| O     | -0.21469200 | -2.54826400 | -2.69586500 | H  | 6.72250400  | 0.86693800  | 3.08098700  |
| C     | 1.25666500  | 4.96283400  | -0.94305700 | H  | 7.59623400  | 1.90783500  | 1.95622800  |
| H     | 1.98437300  | 4.69769400  | -1.71388800 | C  | 5.72737000  | 2.87277400  | 4.73424400  |
| H     | 0.50144300  | 5.61578400  | -1.39449300 | H  | 3.55549200  | 2.96880800  | 4.69358900  |
| H     | 1.76802800  | 5.54330800  | -0.16809100 | H  | 4.35117900  | 4.07640000  | 3.57838700  |
| Pd    | 1.22363300  | -0.41010300 | -1.05461000 | H  | 7.84834100  | 2.70385500  | 4.29619200  |
| C     | 3.35477300  | -1.26303400 | 3.01624600  | H  | 7.00170000  | 3.90270900  | 3.32204700  |
| C     | 3.90428700  | -0.36537200 | 2.10271500  | H  | 5.84986800  | 3.64369800  | 5.50431300  |
| C     | 3.23642700  | -0.17929700 | 0.89362200  | H  | 5.71394000  | 1.90471900  | 5.25434700  |
| C     | 2.05303600  | -0.87437300 | 0.69884900  | C  | 4.93779900  | -0.15115100 | 0.98925100  |
| C     | 1.58143000  | -1.79334000 | 1.61969000  | C  | 6.01292000  | -0.87648400 | 1.47047000  |
| N     | 2.23919400  | -1.96695800 | 2.78046800  | N  | 3.68248900  | -0.66293400 | 1.18695700  |
| H     | 3.84050000  | -1.44061200 | 3.97265400  | C  | 5.79728000  | -2.02817600 | 2.25839400  |
| H     | 4.82917900  | 0.16699800  | 2.29989800  | H  | 7.02269600  | -0.52534700 | 1.32889300  |
| H     | 0.69090600  | -2.38715700 | 1.46061200  | C  | 3.41474700  | -1.65847600 | 2.11326300  |
| C     | 3.74419700  | 0.67903400  | -0.22610400 | C  | 4.52889600  | -2.38745100 | 2.63033000  |
| O     | 2.99276600  | 0.62064100  | -1.30265100 | H  | 6.65286300  | -2.59423400 | 2.61389400  |
| O     | 4.76741100  | 1.34452700  | -0.14541600 | H  | 4.32206900  | -3.22440500 | 3.28710300  |
| O     | 2.20054500  | -1.97793700 | -1.74783600 | O  | 2.21474300  | -1.92311200 | 2.43268700  |
| H     | 1.47150500  | -2.41411200 | -2.23620800 | C  | 0.78688700  | 4.66290500  | -1.36228800 |
|       |             |             |             | H  | -0.14513700 | 4.10268200  | -1.43003800 |
|       |             |             |             | H  | 0.64882000  | 5.46307700  | -0.62677200 |
|       |             |             |             | H  | 0.98189100  | 5.13986600  | -2.32823000 |
|       |             |             |             | Pd | 2.30325400  | -0.46616800 | -0.33863100 |
|       |             |             |             | C  | 0.84058700  | -4.81606600 | -1.60370100 |
|       |             |             |             | C  | 0.43893300  | -3.67881400 | -2.29744900 |
|       |             |             |             | C  | 0.90703300  | -2.44691500 | -1.84318900 |
|       |             |             |             | C  | 1.74666700  | -2.40599600 | -0.73466500 |
|       |             |             |             | C  | 2.09735200  | -3.59082000 | -0.09491900 |
|       |             |             |             | N  | 1.64799500  | -4.77844800 | -0.53390700 |
|       |             |             |             | H  | 0.49913700  | -5.80069200 | -1.91403000 |
|       |             |             |             | H  | -0.22783300 | -3.72631300 | -3.15019700 |
|       |             |             |             | H  | 2.74419100  | -3.61687600 | 0.77118700  |
|       |             |             |             | C  | 0.52882900  | -1.15379900 | -2.48774800 |
| 12_BQ |             |             |             |    |             |             |             |
| C     | 4.02169100  | 2.09445300  | -0.12642200 |    |             |             |             |
| C     | 4.28118800  | 3.41669600  | -0.52791600 |    |             |             |             |
| C     | 3.25363000  | 4.24391100  | -0.94724900 |    |             |             |             |
| C     | 1.93319500  | 3.77760500  | -0.96716600 |    |             |             |             |
| C     | 1.74915100  | 2.44833700  | -0.61082000 |    |             |             |             |
| N     | 2.76214700  | 1.64558400  | -0.22307700 |    |             |             |             |
| H     | 3.47305400  | 5.26410200  | -1.24865500 |    |             |             |             |
| H     | 5.28797200  | 3.80866400  | -0.48828900 |    |             |             |             |
| H     | 0.76929600  | 1.99173300  | -0.64741500 |    |             |             |             |
| C     | 5.17033900  | 1.30490300  | 0.53331400  |    |             |             |             |
| C     | 6.39572500  | 1.38456600  | -0.40840900 |    |             |             |             |
| H     | 6.75412600  | 2.41094100  | -0.49836500 |    |             |             |             |

|   |             |             |             |    |             |             |             |
|---|-------------|-------------|-------------|----|-------------|-------------|-------------|
| O | 0.98100900  | -0.09418200 | -1.83861900 | H  | -4.16854900 | -2.76290500 | -3.30670100 |
| O | -0.12250200 | -1.06640700 | -3.51718000 | O  | -2.35815200 | -2.48284600 | -1.45085800 |
| H | 1.33494400  | -1.03496900 | 1.75055500  | C  | 0.44529200  | 3.42733200  | 2.80638600  |
| O | 0.88379300  | -0.37409300 | 1.05454200  | H  | 1.31913700  | 3.78888300  | 2.25230300  |
| O | -1.19456600 | -1.53660100 | 0.60476800  | H  | 0.16831000  | 4.20553600  | 3.52459300  |
| C | -2.65491900 | 2.44313600  | -0.02302700 | H  | 0.74329100  | 2.53285600  | 3.35929100  |
| C | -2.35430500 | 3.78935200  | 0.24905200  | Pd | -2.84265300 | -0.50337900 | 0.94098800  |
| C | -1.38576200 | 4.13087000  | 1.18000500  | C  | -4.57578900 | -4.62248200 | 2.55553200  |
| C | -0.68442700 | 3.13061900  | 1.86112800  | C  | -3.88092100 | -3.74452800 | 3.38206900  |
| C | -1.08327200 | 1.82621500  | 1.60412000  | C  | -3.40599700 | -2.56117600 | 2.81790800  |
| N | -2.02737800 | 1.50118400  | 0.69868800  | C  | -3.64324700 | -2.30634200 | 1.47093200  |
| H | -1.16124900 | 5.17737000  | 1.36341700  | C  | -4.34027800 | -3.24280800 | 0.71396600  |
| H | -2.86219200 | 4.57711300  | -0.28996100 | N  | -4.80491100 | -4.38109900 | 1.25682300  |
| H | -0.63945900 | 1.00318800  | 2.14346400  | H  | -4.96515800 | -5.55906800 | 2.94768900  |
| C | -3.62088600 | 2.14322000  | -1.18719000 | H  | -3.70424900 | -3.95776200 | 4.43113800  |
| C | -4.89744900 | 2.98742300  | -0.94297000 | H  | -4.54789500 | -3.10307500 | -0.33859800 |
| H | -4.68752800 | 4.05234500  | -1.05364900 | C  | -2.65600700 | -1.53809300 | 3.60930400  |
| H | -5.69461600 | 2.74766500  | -1.64329500 | O  | -2.34463300 | -0.45989000 | 2.91994700  |
| H | -5.27880900 | 2.82607900  | 0.06762500  | O  | -2.36952100 | -1.67488500 | 4.79111900  |
| C | -2.82709900 | 2.67559900  | -2.47609100 | H  | -1.45839700 | -1.99219700 | -0.25840300 |
| C | -1.64092300 | 1.76768200  | -2.82935700 | H  | -0.02856100 | -0.84719200 | 0.73748900  |
| C | -3.65664600 | 2.96117500  | -3.73716200 | C  | -6.34374200 | -0.55139800 | 0.34322500  |
| H | -2.42388100 | 3.64592600  | -2.16653100 | C  | -5.81815200 | 0.41379000  | 1.31106200  |
| C | -0.76158500 | 2.37562800  | -3.92711400 | C  | -6.74717700 | 1.28983200  | 2.03830900  |
| H | -2.01009700 | 0.79927700  | -3.18111400 | C  | -8.07153900 | 1.19392900  | 1.83850900  |
| H | -1.03501500 | 1.55233000  | -1.94547400 | C  | -8.62917100 | 0.20913500  | 0.87811000  |
| C | -2.77456000 | 3.62216300  | -4.80839200 | C  | -7.66899000 | -0.65273300 | 0.14580900  |
| H | -4.05193500 | 2.02894600  | -4.15139700 | H  | -5.64216200 | -1.16960800 | -0.19394900 |
| H | -4.51133200 | 3.60546100  | -3.50694800 | H  | -6.30671500 | 1.99551700  | 2.73453500  |
| C | -1.58266900 | 2.72868600  | -5.17213900 | H  | -8.78243100 | 1.82247000  | 2.36480700  |
| H | 0.03241700  | 1.66371300  | -4.17346700 | H  | -8.08748600 | -1.35948900 | -0.56326200 |
| H | -0.27703800 | 3.28469400  | -3.54999400 | O  | -4.59942700 | 0.54932300  | 1.56097200  |
| H | -3.37773900 | 3.83710600  | -5.69855600 | O  | -9.83708400 | 0.11506500  | 0.69271300  |
| H | -2.40640900 | 4.58810600  | -4.43498400 | C  | 6.39254900  | -1.83562400 | -3.78953500 |
| H | -0.95074100 | 3.22041900  | -5.92180900 | C  | 6.77980800  | -3.01037800 | -2.96912800 |
| H | -1.95827600 | 1.80362600  | -5.63218400 | C  | 6.02886800  | -3.24533300 | -1.71057800 |
| C | -3.99754200 | 0.67845500  | -1.51290100 | C  | 5.03352100  | -2.42870300 | -1.32496500 |
| C | -4.95567600 | 0.45589700  | -2.48473100 | C  | 4.65650400  | -1.29260500 | -2.16465300 |
| N | -3.26000000 | -0.39354300 | -1.07572800 | C  | 5.39350700  | -1.02466200 | -3.40524400 |
| C | -5.05714500 | -0.80750500 | -3.10895300 | H  | 6.95065300  | -1.66965700 | -4.70513400 |
| H | -5.57697500 | 1.26158800  | -2.84129800 | H  | 6.32927100  | -4.09930000 | -1.11229400 |
| C | -3.19313600 | -1.59748900 | -1.77443100 | H  | 4.49404900  | -2.59248300 | -0.40522400 |
| C | -4.16155600 | -1.79761500 | -2.81369500 | H  | 5.08292100  | -0.15992600 | -3.98167800 |
| H | -5.82300800 | -0.96597800 | -3.86247400 | O  | 7.69007400  | -3.75457800 | -3.31330500 |



|                    |             |             |             |                    |             |             |             |
|--------------------|-------------|-------------|-------------|--------------------|-------------|-------------|-------------|
| O                  | 3.72044900  | -0.50139300 | -1.89130400 | C                  | 0.67046400  | 3.90249700  | 2.94413200  |
|                    |             |             |             | H                  | -0.22486500 | 3.62519600  | 3.50650200  |
| 6 <sup>t</sup> _BQ |             |             |             | H                  | 1.48366900  | 4.08131600  | 3.65603400  |
| C                  | 1.64241800  | 0.81897700  | 0.08925000  | H                  | 0.47577400  | 4.84733800  | 2.42474900  |
| C                  | 2.43498200  | 1.97780300  | 0.17898900  | Pd                 | -1.09005100 | -0.46998400 | 0.31520500  |
| C                  | 2.14220100  | 2.97390000  | 1.09498900  | C                  | -5.17550900 | -2.03734700 | -1.53930700 |
| C                  | 1.04443000  | 2.83869900  | 1.95321700  | C                  | -5.14324400 | -0.97379700 | -0.64007300 |
| C                  | 0.27931000  | 1.69279500  | 1.78874000  | C                  | -3.90570300 | -0.59197300 | -0.12611600 |
| N                  | 0.56103200  | 0.72984500  | 0.88569900  | C                  | -2.74167900 | -1.28593400 | -0.48985500 |
| H                  | 2.76529600  | 3.86186200  | 1.14156700  | C                  | -2.89046600 | -2.31684900 | -1.42574400 |
| H                  | 3.29837500  | 2.09954500  | -0.46010400 | N                  | -4.07432800 | -2.69106100 | -1.94265000 |
| H                  | -0.62892600 | 1.54462800  | 2.35989300  | H                  | -6.11892800 | -2.37098100 | -1.96733400 |
| C                  | 2.16095900  | -0.32471900 | -0.82142300 | H                  | -6.04450200 | -0.44015100 | -0.35449000 |
| C                  | 2.42935900  | 0.27148300  | -2.22540200 | H                  | -2.02928600 | -2.86931500 | -1.79401700 |
| H                  | 3.09829000  | 1.13081400  | -2.17728900 | C                  | -3.72892600 | 0.60028300  | 0.76730600  |
| H                  | 2.89486700  | -0.45167700 | -2.89291100 | O                  | -2.46758000 | 0.88973500  | 1.00392600  |
| H                  | 1.48795100  | 0.58768100  | -2.67835500 | O                  | -4.67144500 | 1.25716100  | 1.20198200  |
| C                  | 3.52262600  | -0.75337100 | -0.08927600 | H                  | -1.49613700 | -2.66417000 | 1.08763600  |
| C                  | 3.25128600  | -1.43854800 | 1.26176200  | O                  | -1.81967800 | -1.62984800 | 3.56243700  |
| C                  | 4.54860600  | -1.57602900 | -0.88535000 | O                  | -2.97439800 | -1.27840300 | 3.69165000  |
| H                  | 4.02410200  | 0.19569700  | 0.12314500  | C                  | 0.98144900  | 4.46980000  | -2.01084000 |
| C                  | 4.54532200  | -1.58947800 | 2.07233800  | C                  | 0.23087300  | 4.80382200  | -0.77528200 |
| H                  | 2.81681300  | -2.43099000 | 1.08283100  | C                  | -0.90446500 | 3.92736000  | -0.40699600 |
| H                  | 2.51453300  | -0.87338700 | 1.84223200  | C                  | -1.24256200 | 2.86962400  | -1.16133000 |
| C                  | 5.85820800  | -1.68582000 | -0.08755400 | C                  | -0.48831800 | 2.53120700  | -2.38679300 |
| H                  | 4.17504300  | -2.58837000 | -1.06543400 | C                  | 0.64535900  | 3.41071700  | -2.76395000 |
| H                  | 4.74534200  | -1.12040900 | -1.86108500 | H                  | 1.81074000  | 5.12335300  | -2.26372000 |
| C                  | 5.62286900  | -2.33816800 | 1.27975600  | H                  | -1.43808200 | 4.17866800  | 0.50390600  |
| H                  | 4.33577000  | -2.10707900 | 3.01590500  | H                  | -2.05063900 | 2.20495600  | -0.88106200 |
| H                  | 4.91779000  | -0.58984500 | 2.33608500  | H                  | 1.18281200  | 3.14871200  | -3.67008700 |
| H                  | 6.59123500  | -2.26291600 | -0.66345200 | O                  | 0.54449000  | 5.77252800  | -0.08563200 |
| H                  | 6.28466700  | -0.68305000 | 0.05380700  | O                  | -0.78223600 | 1.54878000  | -3.06800900 |
| H                  | 6.55811500  | -2.37718900 | 1.85090800  |                    |             |             |             |
| H                  | 5.30037700  | -3.37789500 | 1.12836700  | 6 <sup>s</sup> _BQ |             |             |             |
| C                  | 1.34746500  | -1.62440000 | -0.99398400 | C                  | 1.56654600  | 1.20217900  | 0.43142500  |
| C                  | 1.84233700  | -2.59982600 | -1.85939400 | C                  | 2.22871700  | 2.39364700  | 0.78375700  |
| N                  | 0.27362800  | -1.93825900 | -0.21789800 | C                  | 1.83472500  | 3.12863600  | 1.88943200  |
| C                  | 1.37055900  | -3.91305900 | -1.78929700 | C                  | 0.77804700  | 2.68275500  | 2.69240400  |
| H                  | 2.62970300  | -2.36513200 | -2.55706800 | C                  | 0.14793200  | 1.51943500  | 2.27660200  |
| C                  | -0.12911000 | -3.21970900 | -0.09046000 | N                  | 0.51782800  | 0.82589700  | 1.17904300  |
| C                  | 0.41843000  | -4.25637900 | -0.84744200 | H                  | 2.35822900  | 4.04744500  | 2.13805800  |
| H                  | 1.78031700  | -4.66804100 | -2.45223500 | H                  | 3.06851200  | 2.74659300  | 0.20193600  |
| H                  | 0.05615400  | -5.26803600 | -0.71434100 | H                  | -0.71213800 | 1.12947500  | 2.80699100  |
| O                  | -1.10584300 | -3.50831600 | 0.77817900  | C                  | 2.15875400  | 0.35057100  | -0.71482700 |

|    |             |             |             |   |             |             |             |
|----|-------------|-------------|-------------|---|-------------|-------------|-------------|
| C  | 2.39009000  | 1.30537400  | -1.91206000 | H | -1.70397600 | -2.86999500 | -1.78294000 |
| H  | 3.07109700  | 2.11158800  | -1.64154800 | C | -3.68279200 | -0.01708200 | 1.28196100  |
| H  | 2.83581100  | 0.80840200  | -2.76925200 | O | -2.47621700 | 0.50677800  | 1.39327700  |
| H  | 1.44973900  | 1.75211600  | -2.23638900 | O | -4.66075100 | 0.43212700  | 1.86731000  |
| C  | 3.56822400  | -0.13009900 | -0.12024800 | H | -0.59971000 | -3.31843800 | 1.18894600  |
| C  | 3.41458000  | -1.07714700 | 1.08180500  | O | -0.71349700 | -1.57846000 | 2.27588500  |
| C  | 4.56946600  | -0.72545100 | -1.12234700 | O | -1.28055200 | -2.77183600 | 2.28894900  |
| H  | 4.03042000  | 0.79211900  | 0.24961300  | C | -1.35459000 | 4.16437800  | -0.57785100 |
| C  | 4.76577100  | -1.31696700 | 1.76813700  | C | -0.97735700 | 4.83035100  | -1.84835400 |
| H  | 3.01041000  | -2.03745300 | 0.73973000  | C | -0.78513800 | 3.97009200  | -3.04280100 |
| H  | 2.69678100  | -0.67477600 | 1.80389000  | C | -0.89524500 | 2.63446900  | -2.96000500 |
| C  | 5.93062800  | -0.94777100 | -0.44389600 | C | -1.17742100 | 1.98124400  | -1.66583900 |
| H  | 4.20321800  | -1.68710200 | -1.49641600 | C | -1.47170100 | 2.82928400  | -0.49547300 |
| H  | 4.69465300  | -0.06746100 | -1.98770700 | H | -1.53887500 | 4.81200200  | 0.27372400  |
| C  | 5.80505900  | -1.86018100 | 0.78125000  | H | -0.54413700 | 4.47522300  | -3.97299600 |
| H  | 4.63754500  | -2.00940700 | 2.60849200  | H | -0.74465400 | 1.98025300  | -3.81276200 |
| H  | 5.12667300  | -0.36911400 | 2.19126400  | H | -1.77468700 | 2.32303800  | 0.41356000  |
| H  | 6.63531300  | -1.37482900 | -1.16721300 | O | -0.84071200 | 6.04809300  | -1.91350700 |
| H  | 6.34422600  | 0.02210800  | -0.13442600 | O | -1.13472700 | 0.74412000  | -1.58826600 |
| H  | 6.77797000  | -1.97397500 | 1.27415800  |   |             |             |             |
| H  | 5.49731200  | -2.86252800 | 0.45165400  |   |             |             |             |
| C  | 1.44829000  | -0.94124400 | -1.19185100 |   |             |             |             |
| C  | 1.87446200  | -1.51958900 | -2.37937200 |   |             |             |             |
| N  | 0.61476200  | -1.66090300 | -0.37195100 |   |             |             |             |
| C  | 1.57808200  | -2.86270500 | -2.65997500 |   |             |             |             |
| H  | 2.49963900  | -0.97784200 | -3.07021900 |   |             |             |             |
| C  | 0.43638300  | -2.99498600 | -0.56086000 |   |             |             |             |
| C  | 0.91868200  | -3.62646600 | -1.72787600 |   |             |             |             |
| H  | 1.91976300  | -3.30382600 | -3.59103200 |   |             |             |             |
| H  | 0.72111100  | -4.68295600 | -1.86310200 |   |             |             |             |
| O  | -0.20541600 | -3.74357500 | 0.30144600  |   |             |             |             |
| C  | 0.32805700  | 3.42561800  | 3.91771500  |   |             |             |             |
| H  | -0.52253500 | 2.92933400  | 4.39160000  |   |             |             |             |
| H  | 1.13868200  | 3.49428600  | 4.65144500  |   |             |             |             |
| H  | 0.03204600  | 4.44938600  | 3.66399200  |   |             |             |             |
| Pd | -0.96681300 | -0.55122600 | 0.49032900  |   |             |             |             |
| C  | -4.87968500 | -2.77111900 | -1.02140400 |   |             |             |             |
| C  | -4.93713900 | -1.77927700 | -0.04587100 |   |             |             |             |
| C  | -3.74073700 | -1.17351800 | 0.33493600  |   |             |             |             |
| C  | -2.53761300 | -1.59236800 | -0.23687200 |   |             |             |             |
| C  | -2.59078300 | -2.55534000 | -1.24392700 |   |             |             |             |
| N  | -3.73999000 | -3.13982500 | -1.62609600 |   |             |             |             |
| H  | -5.78531000 | -3.27712000 | -1.34934100 |   |             |             |             |
| H  | -5.87673100 | -1.46462500 | 0.39711300  |   |             |             |             |
